# Supplementary material for: Calculation of the Surface Tension of Ordinary Organic and Ionic Liquids by Means of a Generally Applicable Computer Algorithm Based on the Group&mdash;Additivity Method
Source: Preprints.org preprint supplement (doi:10.20944/preprints201804.0210.v1), 2018-04-16
Supplement: Supplementary file 1 [file S1. Experimental and Calculated Surface-Tension Data Table.doc]

|  | **Molecules sorted by deviation** |  |  |  |  |
| --- | --- | --- | --- | --- | --- |
| **Entry** | **Molecule name** | **Surface tension exp** | **Surface tension calc** | **Surface tension test** | **Deviation** |
| 1 | 4-(2,2,6-Trimethyl-2-cyclohexenyl)-2-butanol | 30.89 | 30.91 | 30.89 | 0.00 |
| 2 | Methyl cyclobutanecarboxylate | 30.79 | 30.85 | 30.78 | 0.01 |
| 3 | 6-Undecanone | 27.60 | 27.58 | 27.61 | -0.01 |
| 4 | Dodecamethylpentasiloxane | 17.08 | 17.03 | 17.09 | -0.01 |
| 5 | Propyl hydrocinnamate | 34.17 | 34.09 | 34.19 | -0.02 |
| 6 | 3-Ethylhexane | 21.54 | 21.65 | 21.56 | -0.02 |
| 7 | Allyl cyanide | 29.23 | 29.02 | 29.21 | 0.02 |
| 8 | 1,1-Dipropoxyethane | 23.09 | 23.11 | 23.11 | -0.02 |
| 9 | 2,6-Dimethylheptane | 21.00 | 20.96 | 20.98 | 0.02 |
| 10 | Methyl (Z) 9-octadecenoate | 31.30 | 31.28 | 31.32 | -0.02 |
| 11 | Dipropyl pentylmalonate | 28.69 | 28.61 | 28.71 | -0.02 |
| 12 | Ethyl N-methylcarbamate | 32.48 | 32.45 |  | 0.03 |
| 13 | Ethyl mesaconate | 31.54 | 31.48 | 31.51 | 0.03 |
| 14 | t-Butylbenzene | 28.13 | 28.07 | 28.10 | 0.03 |
| 15 | Dipentyl carbonate | 27.47 | 27.48 | 27.44 | 0.03 |
| 16 | 1-Butylnaphthalene | 35.69 | 35.59 | 35.72 | -0.03 |
| 17 | Diisopropyl succinate | 28.24 | 28.28 | 28.21 | 0.03 |
| 18 | Tetrahydrofuran | 26.40 | 26.43 | 26.43 | -0.03 |
| 19 | 1-Hexyl-3-methylimidazolium iodide | 43.50 | 43.48 | 43.47 | 0.03 |
| 20 | Butyl butanoate | 24.75 | 24.70 | 24.72 | 0.03 |
| 21 | 3-Pentanone ketazine | 26.66 | 26.72 | 26.69 | -0.03 |
| 22 | Propyl propylxanthate | 32.86 | 32.85 | 32.83 | 0.03 |
| 23 | 1-Bromononane | 29.57 | 29.84 | 29.53 | 0.04 |
| 24 | 3-Ethyl-2-methylpentane | 20.59 | 20.52 | 20.55 | 0.04 |
| 25 | Ethyl trichloroacetate | 30.82 | 30.84 | 30.86 | -0.04 |
| 26 | N-Butyl-3-methylpyridinium bis(trifluoromethylsulfonyl)amide | 33.60 | 33.58 | 33.64 | -0.04 |
| 27 | Butyl 3-butoxypropanoate | 26.76 | 26.73 | 26.72 | 0.04 |
| 28 | (2-Iodoethyl)benzene | 40.71 | 40.85 | 40.66 | 0.05 |
| 29 | 4-(2,2,6-Trimethyl-1-cyclohexenyl)-2-butanol acetate | 29.67 | 29.55 | 29.72 | -0.05 |
| 30 | 4-Methylanisole | 34.06 | 34.29 | 34.11 | -0.05 |
| 31 | 3-Pentanone O-ethyloxime | 23.78 | 23.79 | 23.73 | 0.05 |
| 32 | Hexadecamethylheptasiloxane | 17.61 | 17.67 | 17.66 | -0.05 |
| 33 | Methyl isoamyl ketone | 25.57 | 25.65 | 25.52 | 0.05 |
| 34 | 2-Nitropropane | 29.87 | 29.88 | 29.92 | -0.05 |
| 35 | Diethylene glycol dimethyl ether | 30.14 | 30.23 | 30.08 | 0.06 |
| 36 | 1-Chlorononane | 28.34 | 28.21 | 28.28 | 0.06 |
| 37 | Diisobutylsulfide | 24.91 | 24.92 | 24.97 | -0.06 |
| 38 | Lauronitrile | 29.82 | 29.90 | 29.88 | -0.06 |
| 39 | Ethyl 2-bromopropionate | 30.36 | 30.35 | 30.30 | 0.06 |
| 40 | Butyl propanoate | 24.39 | 24.50 | 24.45 | -0.06 |
| 41 | 1,3-Dimethylbenzene | 28.47 | 28.42 | 28.41 | 0.06 |
| 42 | Diethylcarbonate | 26.44 | 26.28 | 26.50 | -0.06 |
| 43 | Acetone O-propyloxime | 23.65 | 23.59 | 23.59 | 0.06 |
| 44 | Tetradecamethylhexasiloxane | 17.42 | 17.35 | 17.36 | 0.06 |
| 45 | 1-Ethyl-3-methylimidazolium butylsulfate | 39.64 | 39.14 | 39.58 | 0.06 |
| 46 | Ethyl 2-acetylpentanoate | 29.86 | 29.89 | 29.92 | -0.06 |
| 47 | Tetraethylsilane | 23.06 | 22.99 |  | 0.07 |
| 48 | 1-Pentyl-3-methylimidazolium tris(pentafluoroethyl)trifluorophosphate | 32.40 | 32.63 | 32.47 | -0.07 |
| 49 | n-Butyl acetate | 24.35 | 24.30 | 24.28 | 0.07 |
| 50 | 1-Tridecyne | 27.56 | 27.61 | 27.63 | -0.07 |
| 51 | Diethyl phthalate | 36.54 | 36.66 | 36.47 | 0.07 |
| 52 | Dimethyl phthalate | 41.85 | 41.74 | 41.77 | 0.08 |
| 53 | 4-Ethyl-4-heptanol | 25.63 | 25.63 | 25.55 | 0.08 |
| 54 | 3,5-Dimethylheptane | 20.90 | 20.96 | 20.98 | -0.08 |
| 55 | 1-Bromoundecane | 30.22 | 30.24 | 30.30 | -0.08 |
| 56 | 1-Butyl-3-methylimidazolium acetate | 37.87 | 37.87 | 37.79 | 0.08 |
| 57 | 3,3-Dimethylheptane | 21.13 | 21.14 | 21.21 | -0.08 |
| 58 | Dimethyl chlorofumarate | 37.52 | 37.51 | 37.44 | 0.08 |
| 59 | Butyl ethylxanthate | 32.78 | 32.85 | 32.87 | -0.09 |
| 60 | 2,2,5-Trimethylhexane | 20.03 | 20.01 | 19.94 | 0.09 |
| 61 | 1,4-Diethylbenzene | 29.00 | 28.88 | 29.09 | -0.09 |
| 62 | Dipropyl butylphosphonate | 28.02 | 28.30 | 27.93 | 0.09 |
| 63 | Ethyl 2-cyano-3-ethylvalerate | 30.96 | 31.08 | 31.05 | -0.09 |
| 64 | 2-Propoxy-4-methyl-1,3,2-dioxaphospholane | 28.06 | 28.03 | 28.15 | -0.09 |
| 65 | Methyl crotonate | 28.62 | 28.48 | 28.52 | 0.10 |
| 66 | Propyl 3-butynoate | 29.88 | 29.86 | 29.98 | -0.10 |
| 67 | Tripropoxymethane | 24.80 | 24.70 |  | 0.10 |
| 68 | Butyl ethyl carbonate | 26.59 | 26.68 | 26.69 | -0.10 |
| 69 | 3-(2-Thienyl)-1-propanol | 36.77 | 36.62 | 36.66 | 0.11 |
| 70 | 2-Chloro-2-methyloctane | 25.85 | 25.82 | 25.74 | 0.11 |
| 71 | 2-Ethoxy-4-methyl-1,3,2-dioxaphospholane | 27.75 | 27.83 | 27.86 | -0.11 |
| 72 | Dibutyl phosphite | 28.24 | 28.59 | 28.35 | -0.11 |
| 73 | 2,3-Dimethylpentane | 19.97 | 20.08 | 20.08 | -0.11 |
| 74 | Methyl diethylmalonate | 31.04 | 31.06 | 31.15 | -0.11 |
| 75 | (trans-1-Butenyl)benzene | 32.01 | 31.79 | 31.89 | 0.12 |
| 76 | Octadecamethyloctasiloxane | 18.03 | 17.99 | 17.91 | 0.12 |
| 77 | Ethyl 2-cyano-3-propyl-2-pentenoate | 34.37 | 34.46 | 34.25 | 0.12 |
| 78 | 2-Nitroanisol | 45.70 | 46.12 | 45.82 | -0.12 |
| 79 | alpha-Methylbenzenepropanol | 35.73 | 35.89 | 35.85 | -0.12 |
| 80 | Methyl beta-bromocinnamate | 44.36 | 44.48 |  | -0.12 |
| 81 | Propyl 2-naphthoate | 38.59 | 39.01 | 38.72 | -0.13 |
| 82 | N,N-Diisobutylaniline | 30.75 | 30.55 | 30.62 | 0.13 |
| 83 | Ethyl acrylate | 24.66 | 24.82 | 24.79 | -0.13 |
| 84 | Diisobutyl maleate | 28.79 | 28.72 | 28.66 | 0.13 |
| 85 | Aconitic acid triethylester | 34.56 | 34.46 | 34.43 | 0.13 |
| 86 | 1-Octanol | 27.10 | 27.23 | 27.23 | -0.13 |
| 87 | 4-Ethyl-2-methylhexane | 20.85 | 20.96 | 20.98 | -0.13 |
| 88 | 1-Nonanol | 27.51 | 27.43 | 27.38 | 0.13 |
| 89 | Ethyl 1,1-cyclopropanedicarboxylate | 32.91 | 33.06 | 33.05 | -0.14 |
| 90 | p-Cymene | 28.10 | 27.75 | 27.96 | 0.14 |
| 91 | Dibutyl carbonate | 27.19 | 27.08 | 27.05 | 0.14 |
| 92 | Butyl ethyl sulfide | 26.47 | 26.78 | 26.61 | -0.14 |
| 93 | Docosane | 28.97 | 28.94 | 29.11 | -0.14 |
| 94 | 2-(2-Octyloxyethoxy)ethanol | 30.70 | 30.89 | 30.84 | -0.14 |
| 95 | beta-Ethyl-beta-methylstyrene | 31.80 | 31.66 | 31.66 | 0.14 |
| 96 | Methyl allylmalonate | 32.57 | 32.53 | 32.43 | 0.14 |
| 97 | 1-Methylcyclopentanol | 29.75 | 29.97 | 29.89 | -0.14 |
| 98 | 3-Ethylheptane | 21.89 | 22.09 | 22.03 | -0.14 |
| 99 | Dipropyl azodicarboxylate | 32.14 | 32.28 |  | -0.14 |
| 100 | 3-Phenylpropene | 30.37 | 30.64 | 30.51 | -0.14 |
| 101 | 3-Methylisoxazole | 35.13 | 34.95 | 35.27 | -0.14 |
| 102 | Diisopentyl acetylenedicarboxylate | 30.68 | 30.58 | 30.53 | 0.15 |
| 103 | Propyl phenylpropiolate | 37.07 | 37.19 | 37.22 | -0.15 |
| 104 | Di-n-propylsulfite | 28.69 | 28.71 | 28.54 | 0.15 |
| 105 | 2-Methyloctane | 21.88 | 22.09 | 22.03 | -0.15 |
| 106 | Butyl isobutanoate | 23.50 | 23.57 | 23.65 | -0.15 |
| 107 | 4-Hydroxy-4-methyl-2-pentanone | 31.00 | 31.15 | 31.15 | -0.15 |
| 108 | Methylacetoacetate | 33.09 | 32.96 | 32.94 | 0.15 |
| 109 | 2-Pentanone ketazine | 27.01 | 26.72 | 26.85 | 0.16 |
| 110 | Dipropyl propylphosphonate | 27.97 | 28.10 | 28.13 | -0.16 |
| 111 | 1,4-Dimethylbenzene | 28.55 | 28.42 | 28.39 | 0.16 |
| 112 | 2-Ethylthiophene | 29.86 | 30.05 | 30.02 | -0.16 |
| 113 | Propyl valerate | 24.79 | 24.70 | 24.63 | 0.16 |
| 114 | 4-Propylpyridine | 32.08 | 32.34 | 32.24 | -0.16 |
| 115 | Ethyl 2-cyano-3-methylvalerate | 30.81 | 30.88 | 30.97 | -0.16 |
| 116 | 2,2,3-Trimethylpentane | 19.77 | 19.57 | 19.60 | 0.17 |
| 117 | 4-Ethylheptane | 21.89 | 22.09 | 22.06 | -0.17 |
| 118 | 1-Methyl-1-propylpyrrolidinium bis(trifluoromethanesulfonyl) amide | 32.30 | 32.38 | 32.47 | -0.17 |
| 119 | 3-Hexyloxypropanenitrile | 30.33 | 30.73 | 30.50 | -0.17 |
| 120 | 2-Heptanone | 26.65 | 26.78 | 26.82 | -0.17 |
| 121 | Ethyl propyl carbonate | 26.60 | 26.48 | 26.43 | 0.17 |
| 122 | Methyl 3-methyl-3-propylglutarate | 31.20 | 31.46 | 31.37 | -0.17 |
| 123 | 3-(Diethylamino)propionitrile | 30.18 | 30.73 | 30.35 | -0.17 |
| 124 | Butyl propyl carbonate | 26.93 | 26.88 | 27.10 | -0.17 |
| 125 | Dimethyl disulfide | 34.06 | 34.64 | 34.23 | -0.17 |
| 126 | Diethyl cyclopropane-1,1-dicarboxylate | 31.76 | 31.60 | 31.58 | 0.18 |
| 127 | Ethyl pentyl carbonate | 27.03 | 26.88 | 26.85 | 0.18 |
| 128 | N-Propylaniline | 34.79 | 35.22 | 34.97 | -0.18 |
| 129 | Undecane | 24.21 | 24.10 | 24.03 | 0.18 |
| 130 | 3-Pentyloxypropanenitrile | 30.36 | 30.53 | 30.54 | -0.18 |
| 131 | Ethyl 2-cyano-3-methyl-2-pentenoate | 33.86 | 34.06 | 34.04 | -0.18 |
| 132 | 2-Butoxy-4-methyl-1,3,2-dioxaphospholane | 28.32 | 28.23 | 28.14 | 0.18 |
| 133 | n-Butyl cinnamate | 35.75 | 35.93 | 35.93 | -0.18 |
| 134 | 2-Butylnaphthalene | 35.32 | 35.59 | 35.50 | -0.18 |
| 135 | Pentachloroethane | 34.14 | 34.29 | 34.32 | -0.18 |
| 136 | 2-Chloroanisole | 38.60 | 38.31 | 38.78 | -0.18 |
| 137 | 2-Chlorotoluene | 32.44 | 32.20 | 32.26 | 0.18 |
| 138 | 2-Pentanone O-ethyloxime | 23.56 | 23.79 | 23.74 | -0.18 |
| 139 | 1-Butyl-1-methylpyrrolidinium trifluoroacetate | 35.70 | 35.61 | 35.88 | -0.18 |
| 140 | Trimethylisoxazole | 33.56 | 33.75 |  | -0.19 |
| 141 | Isobutyl acetate | 23.06 | 23.17 | 23.25 | -0.19 |
| 142 | Bromodiethylmethylsilane | 23.97 | 24.16 |  | -0.19 |
| 143 | Methyl 3-ethoxypropanoate | 28.71 | 28.47 | 28.52 | 0.19 |
| 144 | 5-Methyl-5-decanol | 26.14 | 26.03 | 25.95 | 0.19 |
| 145 | Di-n-butylsulfide | 27.23 | 27.18 | 27.42 | -0.19 |
| 146 | 1-Hexyl-3-methylimidazolium bis(trifluoromethanesulfonyl) amide | 32.31 | 32.53 | 32.51 | -0.20 |
| 147 | Methylsalicylate | 39.80 | 39.99 | 39.60 | 0.20 |
| 148 | Decane | 23.39 | 23.66 | 23.59 | -0.20 |
| 149 | 2-Propylnaphthalene | 35.70 | 35.36 | 35.50 | 0.20 |
| 150 | Propyl 1-naphthylketone | 41.45 | 41.29 | 41.25 | 0.20 |
| 151 | Ethyl fumarate | 31.79 | 31.64 | 31.59 | 0.20 |
| 152 | Ethyl hexanoate | 24.83 | 24.70 | 24.63 | 0.20 |
| 153 | 3-Butoxypropanenitrile | 29.90 | 30.33 | 30.10 | -0.20 |
| 154 | 3-Propylpyridine | 32.48 | 32.34 | 32.27 | 0.21 |
| 155 | 4-(2,2,6-Trimethyl-1-cyclohexenyl)-2-butanol | 31.68 | 31.68 | 31.47 | 0.21 |
| 156 | Methyl cyclopropanecarboxylate | 30.79 | 30.65 | 30.58 | 0.21 |
| 157 | Methyl 3,3-diethylglutarate | 31.74 | 31.46 | 31.53 | 0.21 |
| 158 | Ethyl-n-hexylether | 22.08 | 22.29 | 22.29 | -0.21 |
| 159 | Ethyl 2-cyano-3-methylbutyrate | 30.47 | 30.68 | 30.68 | -0.21 |
| 160 | 2-Butanone O-ethyloxime | 23.75 | 23.59 | 23.54 | 0.21 |
| 161 | Propyl 2-thiophenecarboxylate | 34.06 | 34.29 | 34.27 | -0.21 |
| 162 | Dipropyl disulfide | 30.53 | 30.54 | 30.31 | 0.22 |
| 163 | Methacrylic acid | 26.50 | 26.12 | 26.28 | 0.22 |
| 164 | Propyl isovalerate | 23.75 | 23.57 | 23.53 | 0.22 |
| 165 | Dibutyl maleate | 30.73 | 30.98 | 30.95 | -0.22 |
| 166 | 2-Butanone O-propyloxime | 23.95 | 23.79 | 23.73 | 0.22 |
| 167 | Propanoic anhydride | 29.70 | 29.44 | 29.48 | 0.22 |
| 168 | 2-Dodecyloxyethanol | 29.60 | 29.86 | 29.82 | -0.22 |
| 169 | 4-Methyl-4-heptanol | 25.17 | 25.43 | 25.39 | -0.22 |
| 170 | Bis(5-H-perfluoropentyl) adipate | 27.70 | 28.00 | 27.92 | -0.22 |
| 171 | Amylamine | 25.20 | 25.51 | 25.42 | -0.22 |
| 172 | 3-(6-Hydroxyhexyl)-imidazolium chloride | 51.30 | 51.52 |  | -0.22 |
| 173 | 2-Methyl-2-heptanol | 25.24 | 25.43 | 25.47 | -0.23 |
| 174 | 2-Octanone | 26.79 | 26.98 | 27.02 | -0.23 |
| 175 | cis-1,2-Dimethylcyclohexane | 25.20 | 25.46 | 25.43 | -0.23 |
| 176 | Amyl acetate | 24.68 | 24.50 | 24.45 | 0.23 |
| 177 | Tripropylamine | 22.82 | 22.89 | 23.05 | -0.23 |
| 178 | 7-H-Perfluoroheptyl methyl ether | 22.10 | 22.78 | 22.33 | -0.23 |
| 179 | Dipropyl carbonate | 26.91 | 26.68 | 26.67 | 0.24 |
| 180 | 4-Pentylpyridine | 32.41 | 32.74 | 32.65 | -0.24 |
| 181 | 4,4-Dimethylheptane | 21.13 | 21.14 | 20.89 | 0.24 |
| 182 | 4-Butylpyridine | 32.37 | 32.54 | 32.61 | -0.24 |
| 183 | Carbitol | 29.53 | 29.69 | 29.77 | -0.24 |
| 184 | 1-Phenyldodecane | 31.60 | 31.99 | 31.84 | -0.24 |
| 185 | 3-Ethyltoluene | 29.08 | 28.65 | 28.84 | 0.24 |
| 186 | 1-Bromotetradecane | 31.17 | 30.84 | 30.93 | 0.24 |
| 187 | 1-Butoxy-1-ethoxyethane | 23.26 | 23.11 | 23.02 | 0.24 |
| 188 | 2-Pentoxy-4-methyl-1,3,2-dioxaphospholane | 28.24 | 28.43 | 28.48 | -0.24 |
| 189 | Isobutylcyclohexane | 26.51 | 26.34 | 26.27 | 0.24 |
| 190 | 1,1-Dibutylhydrazine | 26.17 | 26.01 | 25.92 | 0.25 |
| 191 | 1-Ethyl-3-methylimidazolium diethylphosphate | 37.10 | 36.86 | 36.85 | 0.25 |
| 192 | 1-Fluorohexane | 21.41 | 21.23 | 21.16 | 0.25 |
| 193 | Ethyl propanoate | 23.80 | 24.10 | 24.05 | -0.25 |
| 194 | Allyl phenyl ether | 33.90 | 33.74 | 33.65 | 0.25 |
| 195 | 3-(Propylamino)propionitrile | 31.37 | 31.71 | 31.63 | -0.26 |
| 196 | Dihexyl carbonate | 28.06 | 27.88 | 27.80 | 0.26 |
| 197 | Ethyl allylmalonate | 29.65 | 29.99 | 29.91 | -0.26 |
| 198 | Dimethyldiphenylsilane | 32.91 | 33.17 |  | -0.26 |
| 199 | n-Decyl alcohol | 27.32 | 27.63 | 27.58 | -0.26 |
| 200 | Dibutyl propylmalonate | 28.39 | 28.61 | 28.65 | -0.26 |
| 201 | Dibutyl ethylphosphonate | 28.05 | 28.30 | 28.31 | -0.26 |
| 202 | Di-n-pentyl oxalate | 29.67 | 29.34 | 29.40 | 0.27 |
| 203 | Triisopropyl phosphate | 27.96 | 27.82 | 27.69 | 0.27 |
| 204 | Isopentyl formate | 24.89 | 24.75 | 24.62 | 0.27 |
| 205 | Dipropyl octylphosphonate | 28.77 | 29.10 | 29.04 | -0.27 |
| 206 | Propyl 2-picolinate | 36.98 | 36.62 | 36.71 | 0.27 |
| 207 | 2-Hexoxy-4-methyl-1,3,2-dioxaphospholane | 28.39 | 28.63 | 28.66 | -0.27 |
| 208 | 1-Nitropropane | 29.85 | 30.11 | 30.12 | -0.27 |
| 209 | beta-Isopropylstyrene | 31.40 | 30.89 | 31.13 | 0.27 |
| 210 | 1-Butyl-3-methylimidazolium lactate | 44.00 | 44.11 | 44.27 | -0.27 |
| 211 | 2-Methyl-2-octanol | 25.84 | 25.63 | 25.56 | 0.28 |
| 212 | Dipropyl acetylenedicarboxylate | 32.18 | 32.04 | 31.90 | 0.28 |
| 213 | Ethyl amyl ether | 22.20 | 22.09 | 21.92 | 0.28 |
| 214 | Cyclohexyl ethyl ether | 27.29 | 26.90 | 27.01 | 0.28 |
| 215 | 1-Butyl-2,3-dimethylimidazolium hexafluorophosphate | 44.42 | 44.14 |  | 0.28 |
| 216 | 1-Cyanooctadecane | 31.60 | 31.30 | 31.32 | 0.28 |
| 217 | Diethyl 1,1-cyclobutanedicarboxylate | 31.54 | 31.80 | 31.82 | -0.28 |
| 218 | 5-Dodecanol | 27.45 | 27.70 | 27.73 | -0.28 |
| 219 | 1,3-Dichloropropane | 33.93 | 34.16 | 34.21 | -0.28 |
| 220 | Butyl glycolate | 30.43 | 30.67 | 30.71 | -0.28 |
| 221 | 1-Butyl-3-methylimidazolium glycine | 43.50 | 43.12 | 43.22 | 0.28 |
| 222 | 1-Heptanol | 26.71 | 27.03 | 26.99 | -0.28 |
| 223 | Bis(7-H-perfluoroheptyl) 3-methylglutarate | 25.60 | 25.31 | 25.31 | 0.29 |
| 224 | Bis(5-H-perfluoropentyl) glutarate | 27.50 | 27.80 | 27.79 | -0.29 |
| 225 | 1,6-Hexanediol bis(perfluorobutyrate) | 22.20 | 21.96 | 21.91 | 0.29 |
| 226 | Benzyl alcohol | 35.97 | 35.62 | 35.68 | 0.29 |
| 227 | 3,3-Dimethylhexane | 20.17 | 20.70 | 20.46 | -0.29 |
| 228 | 1,3-Diethylbenzene | 29.17 | 28.88 | 28.88 | 0.29 |
| 229 | Chlorobenzene | 32.99 | 33.27 | 33.28 | -0.29 |
| 230 | 3,4-Dimethylhexane | 20.76 | 20.52 | 20.47 | 0.29 |
| 231 | beta-Ionone | 33.46 | 33.40 | 33.16 | 0.30 |
| 232 | 4-Dodecanol | 27.83 | 27.70 | 27.53 | 0.30 |
| 233 | Pentyl 3-propoxypropanoate | 27.10 | 26.73 | 26.80 | 0.30 |
| 234 | Tetracosane | 29.29 | 29.82 | 29.59 | -0.30 |
| 235 | Dipentyl sulfide | 27.80 | 27.58 | 27.50 | 0.30 |
| 236 | 2,3-Dimethylhexane | 20.09 | 20.52 | 20.39 | -0.30 |
| 237 | 1-Phenyl-3-pentanone | 36.52 | 36.17 | 36.22 | 0.30 |
| 238 | 2,2-Dimethylheptane | 20.89 | 21.14 | 21.19 | -0.30 |
| 239 | n-Hexylformate | 25.89 | 26.08 | 26.19 | -0.30 |
| 240 | Nonane | 22.96 | 23.22 | 23.26 | -0.30 |
| 241 | trans-2-Methylcyclohexanol | 30.91 | 30.51 | 30.60 | 0.31 |
| 242 | 3-Methyl-3-heptanol | 25.68 | 25.43 | 25.37 | 0.31 |
| 243 | Ethyl pentanoate | 24.14 | 24.50 | 24.45 | -0.31 |
| 244 | Anisole | 35.70 | 35.36 | 35.39 | 0.31 |
| 245 | Ethyl 2-allylacetoacetate | 30.30 | 30.41 | 30.61 | -0.31 |
| 246 | n-Propyl acetate | 23.80 | 24.10 | 24.11 | -0.31 |
| 247 | 2-Propyn-1-butyrate | 30.04 | 29.86 | 29.73 | 0.31 |
| 248 | Butyl 3-propoxypropanoate | 26.79 | 26.53 | 26.48 | 0.31 |
| 249 | Ethyl butanoate | 23.94 | 24.30 | 24.25 | -0.31 |
| 250 | Methyl 3-methoxypropanoate | 30.83 | 31.01 | 31.14 | -0.31 |
| 251 | Dipropyl thiosulfate | 29.60 | 29.39 | 29.29 | 0.31 |
| 252 | Dipropyl heptylphosphonate | 28.54 | 28.90 | 28.85 | -0.31 |
| 253 | Decylcyclopentane | 29.34 | 29.67 | 29.65 | -0.31 |
| 254 | 1,2,3,4-Tetrahydronaphthalene | 33.64 | 33.82 | 33.95 | -0.31 |
| 255 | n-Butylbenzoate | 33.67 | 33.89 | 33.98 | -0.31 |
| 256 | 1-Hexyl-3-methylimidazolium hexafluorophosphate | 39.02 | 38.79 | 38.70 | 0.32 |
| 257 | 2-Butanone ketazine | 26.58 | 26.32 | 26.26 | 0.32 |
| 258 | Tributoxymethane | 25.62 | 25.30 |  | 0.32 |
| 259 | Dihexyl sulfide | 28.41 | 27.98 | 28.09 | 0.32 |
| 260 | 4-Methyloctane | 22.34 | 22.09 | 22.01 | 0.33 |
| 261 | Isobutyl valerate | 23.40 | 23.77 | 23.73 | -0.33 |
| 262 | 3-Methylheptane | 21.31 | 21.65 | 21.64 | -0.33 |
| 263 | Methyl trichloroacetate | 33.13 | 33.38 | 33.46 | -0.33 |
| 264 | Decanenitrile | 29.36 | 29.50 | 29.69 | -0.33 |
| 265 | 2,3-Dimethyl-2-butanol | 24.24 | 23.90 | 23.90 | 0.34 |
| 266 | Propyl 2-naphthaleneacetate | 38.81 | 39.21 | 39.15 | -0.34 |
| 267 | Diethyl pentylmalonate | 28.53 | 28.21 | 28.19 | 0.34 |
| 268 | Dimethyl ethylmalonate | 32.38 | 32.69 | 32.72 | -0.34 |
| 269 | 5-Nonanone | 26.77 | 27.18 | 27.11 | -0.34 |
| 270 | Decylcyclohexane | 29.77 | 30.11 | 30.11 | -0.34 |
| 271 | 3-Octanone | 26.68 | 26.98 | 27.02 | -0.34 |
| 272 | Isopropylcyclohexane | 25.50 | 25.90 | 25.84 | -0.34 |
| 273 | 3-Nonanone | 27.43 | 27.18 | 27.09 | 0.34 |
| 274 | Butyl pentanoate | 25.22 | 24.90 | 24.88 | 0.34 |
| 275 | Di-n-butylsulfite | 28.81 | 29.11 | 29.15 | -0.34 |
| 276 | Propyl nicotinate | 36.11 | 36.38 | 36.45 | -0.34 |
| 277 | Allyl iodide | 31.75 | 31.98 | 32.09 | -0.34 |
| 278 | Iodobenzene | 38.71 | 39.05 |  | -0.34 |
| 279 | Pentyl butyrate | 25.20 | 24.90 | 24.85 | 0.35 |
| 280 | 1-Bromohexadecane | 31.65 | 31.24 | 31.30 | 0.35 |
| 281 | 3-Ethyl-3-methylpentane | 21.08 | 20.70 | 20.73 | 0.35 |
| 282 | Propyl 3-methoxypropanoate | 28.42 | 28.67 | 28.77 | -0.35 |
| 283 | Ethyl butylxanthate | 32.90 | 32.85 | 33.25 | -0.35 |
| 284 | 2,7-Dimethyloctane | 21.60 | 21.40 | 21.25 | 0.35 |
| 285 | Diethylsulfoxide | 34.60 | 34.95 |  | -0.35 |
| 286 | N-Methylaniline | 37.38 | 38.05 | 37.73 | -0.35 |
| 287 | Isoamyl acetate | 23.78 | 23.37 | 23.42 | 0.36 |
| 288 | Butyl cyclopropanecarboxylate | 28.91 | 28.51 | 28.55 | 0.36 |
| 289 | Propyl 3-pentyloxypropanoate | 27.00 | 26.73 | 26.64 | 0.36 |
| 290 | Methyl cellosolve | 30.84 | 30.40 | 30.48 | 0.36 |
| 291 | 3-Methyloctane | 22.34 | 22.09 | 21.98 | 0.36 |
| 292 | 2,4-Dimethylhexane | 20.05 | 20.52 | 20.41 | -0.36 |
| 293 | Dibutyl ethylmalonate | 28.79 | 28.41 | 28.43 | 0.36 |
| 294 | Propyl phenylacetate | 34.29 | 33.89 | 33.93 | 0.36 |
| 295 | 2,11-Dichloro-2,11-dimethyldodecane | 31.19 | 31.58 | 31.55 | -0.36 |
| 296 | Methyl 3-ethyl-3-propylglutarate | 31.38 | 31.66 | 31.74 | -0.36 |
| 297 | 1-Butyl-3-methylimidazolium tetrafluoroborate | 44.80 | 44.94 | 44.44 | 0.36 |
| 298 | 4-Propyl-4-heptanol | 25.45 | 25.83 | 25.81 | -0.36 |
| 299 | 4-Fluorotoluene | 28.22 | 27.89 | 27.85 | 0.37 |
| 300 | Butyl isovalerate | 24.22 | 23.77 | 23.85 | 0.37 |
| 301 | 2,2,4-Trimethylhexane | 19.67 | 20.01 | 20.04 | -0.37 |
| 302 | 1-Butyl-3-methylimidazolium tris(pentafluoroethyl)trifluorophosphate | 32.58 | 32.43 | 32.21 | 0.37 |
| 303 | 1-Bromooctadecane | 32.01 | 31.64 | 31.64 | 0.37 |
| 304 | 2-Methyl-1-pentanol | 25.34 | 25.70 | 25.71 | -0.37 |
| 305 | 3-Methyl-1-pentanol | 25.30 | 25.70 | 25.67 | -0.37 |
| 306 | Methyl 1,1-cyclohexanedicarboxylate | 35.80 | 36.20 | 36.17 | -0.37 |
| 307 | Phenyl n-propyl sulfide | 35.37 | 35.63 | 35.74 | -0.37 |
| 308 | Butylcyclohexane | 27.03 | 27.47 | 27.40 | -0.37 |
| 309 | N,N-Dipropylaniline | 32.92 | 32.41 | 32.55 | 0.37 |
| 310 | Butyl 3-ethoxypropanoate | 26.78 | 26.33 | 26.40 | 0.38 |
| 311 | 2-Heptanol | 26.34 | 26.70 | 26.72 | -0.38 |
| 312 | Octadecanenitrile | 31.50 | 31.10 | 31.12 | 0.38 |
| 313 | 6-Methyl-6-dodecanol | 26.07 | 26.43 | 26.45 | -0.38 |
| 314 | 2-Propyn-1-valerate | 29.80 | 30.06 | 30.18 | -0.38 |
| 315 | Dibutyl pentylmalonate | 28.44 | 29.01 | 28.82 | -0.38 |
| 316 | Methylenecyclohexane | 25.69 | 26.17 | 26.07 | -0.38 |
| 317 | Methyl 3-propoxypropanoate | 28.26 | 28.67 | 28.64 | -0.38 |
| 318 | Butyl 3-pentyloxypropanoate | 27.35 | 26.93 | 26.97 | 0.38 |
| 319 | Ethylbenzene | 29.29 | 29.69 | 29.67 | -0.38 |
| 320 | Methyl 9-decynoate | 33.10 | 33.40 | 33.48 | -0.38 |
| 321 | 1-Hexyl-3-methylimidazolium L-alanine | 41.80 | 42.43 | 42.19 | -0.39 |
| 322 | 2,4,4-Trimethylhexane | 20.33 | 20.01 | 19.94 | 0.39 |
| 323 | Butyl vinyl ether | 21.99 | 22.14 | 22.38 | -0.39 |
| 324 | Pentyl 3-methoxypropanoate | 28.59 | 29.07 | 28.98 | -0.39 |
| 325 | Triptane | 18.75 | 19.13 | 19.14 | -0.39 |
| 326 | Pentyl cyclobutanecarboxylate | 29.34 | 28.91 | 28.95 | 0.39 |
| 327 | Butanal | 24.82 | 25.18 | 25.21 | -0.39 |
| 328 | Hexyl 3-propoxypropanoate | 27.32 | 26.93 | 26.92 | 0.40 |
| 329 | N-Propyl-2-methylpyridinium bis(trifluoromethylsulfonyl)amide | 36.89 | 37.29 |  | -0.40 |
| 330 | 5-Propyl-5-decanol | 26.70 | 26.43 | 26.30 | 0.40 |
| 331 | Tripropyl phosphate | 29.08 | 28.81 | 28.68 | 0.40 |
| 332 | Ethyl isovalerate | 23.78 | 23.37 | 23.38 | 0.40 |
| 333 | Dipropyl pentylphosphonate | 28.20 | 28.50 | 28.60 | -0.40 |
| 334 | 2,5,8,11,14-Pentaoxopentadecane | 33.91 | 33.89 | 34.31 | -0.40 |
| 335 | 1-Butyl-1-methylpyrrolidinium bis(trifluoromethylsulfonyl)amide | 32.30 | 32.58 | 32.70 | -0.40 |
| 336 | 4-Methyl-4-nonanol | 26.15 | 25.83 | 25.74 | 0.41 |
| 337 | Triheptyl borate | 26.15 | 25.84 | 25.74 | 0.41 |
| 338 | 3-Methyl-4-(2,6,6-trimethyl-2-cyclohexen-1-yl)-3-buten-2-one | 32.17 | 32.47 | 32.58 | -0.41 |
| 339 | Methyl decanoate | 27.59 | 28.04 | 28.00 | -0.41 |
| 340 | Hexylbenzene | 30.14 | 30.61 | 30.55 | -0.41 |
| 341 | 3-Heptanone | 26.30 | 26.78 | 26.71 | -0.41 |
| 342 | Propyl 1-naphthoate | 39.60 | 39.01 | 39.19 | 0.41 |
| 343 | 3-Methyl-3-hexanol | 24.90 | 25.23 | 25.31 | -0.41 |
| 344 | 2-Butyrylthiophene | 36.78 | 36.57 | 36.37 | 0.41 |
| 345 | 1,2-Dibromopropane | 34.50 | 34.89 | 34.91 | -0.41 |
| 346 | 3-Decanone | 27.82 | 27.38 | 27.40 | 0.42 |
| 347 | 5-Methyl-5-undecanol | 26.54 | 26.23 | 26.12 | 0.42 |
| 348 | 1-Bromododecane | 30.83 | 30.44 | 30.41 | 0.42 |
| 349 | 4-Chloro-4-methylheptane | 25.22 | 25.62 | 25.64 | -0.42 |
| 350 | 1-Bromo-2-ethoxyethane | 29.72 | 30.27 | 30.14 | -0.42 |
| 351 | Ethyl-t-butylsulfide | 23.54 | 23.84 | 23.96 | -0.42 |
| 352 | Pentyl 3-butoxypropanoate | 27.41 | 26.93 | 26.98 | 0.43 |
| 353 | Dipropyl ethylphosphonate | 28.25 | 27.90 | 27.82 | 0.43 |
| 354 | (2-Methyl-1-propenyl)benzene | 31.86 | 31.43 | 31.43 | 0.43 |
| 355 | Methyl dimethylmalonate | 31.04 | 30.66 | 30.61 | 0.43 |
| 356 | 1,1-Diethylhydrazine | 24.87 | 25.21 | 25.30 | -0.43 |
| 357 | 2-Methyl-1-butanol | 25.10 | 25.50 | 25.53 | -0.43 |
| 358 | 1,7-Heptanediol dinitrate | 40.10 | 41.04 | 40.53 | -0.43 |
| 359 | 4-Nonanone | 26.76 | 27.18 | 27.19 | -0.43 |
| 360 | Methyl 3-butynoate | 32.94 | 32.20 | 32.51 | 0.43 |
| 361 | Methyl 3-butenoate | 27.38 | 27.56 | 27.81 | -0.43 |
| 362 | beta,beta-Diethylstyrene | 32.22 | 31.89 | 31.78 | 0.44 |
| 363 | 1-m-tolyl-1-o-tolylethane | 36.10 | 36.45 | 36.54 | -0.44 |
| 364 | Pentyl cyclopropanecarboxylate | 29.12 | 28.71 | 28.68 | 0.44 |
| 365 | 1-Chlorodecane | 28.89 | 28.41 | 28.45 | 0.44 |
| 366 | 1-Undecyne | 26.59 | 27.15 | 27.03 | -0.44 |
| 367 | Butyl 3-methoxypropanoate | 28.48 | 28.87 | 28.92 | -0.44 |
| 368 | Dimethyl chloromaleate | 37.54 | 37.51 | 37.98 | -0.44 |
| 369 | Methyl 3,3-dimethylglutarate | 31.42 | 31.06 | 30.97 | 0.45 |
| 370 | Butylmethylketone | 26.00 | 26.58 | 26.45 | -0.45 |
| 371 | 9-H-Perfluorononyl butyrate | 22.70 | 22.27 | 22.25 | 0.45 |
| 372 | 4-Chloro-4-propylheptane | 26.40 | 26.02 | 25.95 | 0.45 |
| 373 | Tributyl borate | 24.42 | 24.04 | 23.97 | 0.45 |
| 374 | 3-Cyclohexylpropyne | 29.81 | 30.27 | 30.26 | -0.45 |
| 375 | 1-Butanethiol | 25.22 | 25.55 | 25.67 | -0.45 |
| 376 | 1-Dodecyne | 27.70 | 27.38 | 27.24 | 0.46 |
| 377 | beta-Isobutyl-alpha-methylstyrene | 31.38 | 30.99 | 30.92 | 0.46 |
| 378 | n-Hexylamine | 26.22 | 25.71 | 25.76 | 0.46 |
| 379 | 2-Ethylpyridine | 32.01 | 32.38 | 32.47 | -0.46 |
| 380 | 2,5-Dimethylheptane | 20.42 | 20.96 | 20.88 | -0.46 |
| 381 | 2-Pentanone oxime | 28.90 | 29.02 | 29.36 | -0.46 |
| 382 | 3-Hexanone O-ethyloxime | 24.25 | 23.99 | 23.79 | 0.46 |
| 383 | Dodecane | 24.93 | 24.54 | 24.47 | 0.46 |
| 384 | 4-Methylcyclohexanone | 30.96 | 30.59 | 30.49 | 0.47 |
| 385 | 1-Bromo-4-fluorobenzene | 34.68 | 35.10 | 35.15 | -0.47 |
| 386 | 1,4-Dichlorobutane | 34.80 | 34.36 | 34.33 | 0.47 |
| 387 | alpha-Ionone | 32.20 | 32.63 | 32.67 | -0.47 |
| 388 | cis-1,2-Dichloroethylene | 26.40 | 25.92 |  | 0.48 |
| 389 | 4-Chloro-4-ethylheptane | 26.30 | 25.82 | 25.82 | 0.48 |
| 390 | Dipropyl propylmalonate | 28.68 | 28.21 | 28.20 | 0.48 |
| 391 | Hexyl 3-methoxypropanoate | 28.76 | 29.27 | 29.24 | -0.48 |
| 392 | 1-Pentylnaphthalene | 35.18 | 35.82 | 35.66 | -0.48 |
| 393 | Diisopropyl oxalate | 28.43 | 27.88 | 27.94 | 0.49 |
| 394 | 3-Chloro-3-ethylhexane | 26.02 | 25.62 | 25.53 | 0.49 |
| 395 | 4-Methylheptane | 21.12 | 21.65 | 21.61 | -0.49 |
| 396 | Bis(perfluorohexyl) 3-methylglutarate | 19.90 | 19.51 | 19.41 | 0.49 |
| 397 | 1,6-Hexanediol bis(6-H-perfluoroheptanoate) | 25.90 | 26.20 | 26.39 | -0.49 |
| 398 | 2-(2-Pentyloxyethoxy)ethanol | 29.90 | 30.29 | 30.39 | -0.49 |
| 399 | 3-Propoxypropanenitrile | 29.75 | 30.13 | 30.24 | -0.49 |
| 400 | Ethyl orthoformate | 23.60 | 24.10 |  | -0.50 |
| 401 | 2-Methyl-1-propanethiol | 24.01 | 24.42 | 24.51 | -0.50 |
| 402 | 1,1,2-Trichloroethane | 34.02 | 34.50 | 34.52 | -0.50 |
| 403 | 4-Methylpent-3-en-2-one | 28.40 | 27.86 | 27.89 | 0.51 |
| 404 | Heptadecanonitrile | 31.37 | 30.90 | 30.86 | 0.51 |
| 405 | Butyl perfluorooctanoate | 18.70 | 19.25 | 19.21 | -0.51 |
| 406 | 2-Pentylthiophene | 30.09 | 30.65 | 30.60 | -0.51 |
| 407 | Isopropyl hydrocinnamate | 33.09 | 33.76 | 33.60 | -0.51 |
| 408 | Dihexyl phosphite | 28.73 | 29.39 | 29.24 | -0.51 |
| 409 | Ethyl acetate | 23.39 | 23.90 | 23.90 | -0.51 |
| 410 | 3-Butylpyridine | 31.90 | 32.54 | 32.41 | -0.51 |
| 411 | Propyl 1-naphthaleneacetate | 38.88 | 39.21 | 39.40 | -0.52 |
| 412 | Dihexyloxymethane | 27.02 | 25.39 | 26.50 | 0.52 |
| 413 | Propyl 3-butoxypropanoate | 27.11 | 26.53 | 26.59 | 0.52 |
| 414 | 4-Methyl-4-decanol | 26.47 | 26.03 | 25.95 | 0.52 |
| 415 | Bis(perfluorobutyl) sebacate | 22.40 | 23.00 | 22.92 | -0.52 |
| 416 | Dipentyl maleate | 30.81 | 31.38 | 31.33 | -0.52 |
| 417 | Butyl butoxyacetate | 27.13 | 26.53 | 26.60 | 0.53 |
| 418 | Methyl tetradecanoate | 29.40 | 28.84 | 28.87 | 0.53 |
| 419 | n-Propylchloroacetate | 30.74 | 31.25 | 31.27 | -0.53 |
| 420 | 4-Methyl-4-octanol | 26.10 | 25.63 | 25.57 | 0.53 |
| 421 | Diisobutylsulfite | 27.10 | 26.85 | 26.57 | 0.53 |
| 422 | Ethanethiol | 24.70 | 25.15 | 25.23 | -0.53 |
| 423 | 2,4-Xylidine | 37.35 | 37.86 | 37.88 | -0.53 |
| 424 | Butyrophenone | 35.49 | 35.97 | 36.02 | -0.53 |
| 425 | 1-Propanethiol | 24.84 | 25.35 | 25.38 | -0.54 |
| 426 | 1,10-Decanediol bis(perfluorobutyrate) | 23.00 | 22.76 | 22.46 | 0.54 |
| 427 | 1,7-Diiodoheptane | 43.93 | 43.46 | 43.39 | 0.54 |
| 428 | Di-n-pentyl succinate | 30.27 | 29.74 | 29.73 | 0.54 |
| 429 | 3-Methylcyclopentanone | 29.72 | 30.39 | 30.26 | -0.54 |
| 430 | Cumene | 28.20 | 28.79 | 28.74 | -0.54 |
| 431 | 3-Chloro-3-methylhexane | 24.83 | 25.42 | 25.38 | -0.55 |
| 432 | Isopentylamine | 23.81 | 24.38 | 24.36 | -0.55 |
| 433 | Bis(5-H-perfluoropentyl) sebacate | 28.20 | 28.80 | 28.75 | -0.55 |
| 434 | 4-Methyl-3-penten-2-one oxime | 30.84 | 30.50 | 30.29 | 0.55 |
| 435 | Pentyl 3-pentyloxypropanoate | 27.68 | 27.13 | 27.13 | 0.55 |
| 436 | Isovaleraldehyde | 23.69 | 24.25 | 24.24 | -0.55 |
| 437 | Tris(2-propoxyethyl) phosphite | 28.94 | 29.51 | 29.49 | -0.55 |
| 438 | Methyl dichloroacetate | 34.56 | 34.13 | 34.01 | 0.55 |
| 439 | 1-Pentyl-3-methylimidazolium bis(trifluoromethanesulfonyl) amide | 32.90 | 32.33 | 32.34 | 0.56 |
| 440 | Hexacosane | 29.89 | 30.70 | 30.45 | -0.56 |
| 441 | Caprylene | 21.28 | 21.82 | 21.84 | -0.56 |
| 442 | 2,4-Dimethylheptane | 20.42 | 20.96 | 20.98 | -0.56 |
| 443 | 1-Pentyl-3-methylimidazolium tetracyanoborate | 43.10 | 42.70 | 42.54 | 0.56 |
| 444 | 3-Tolunitrile | 36.82 | 36.42 | 36.26 | 0.56 |
| 445 | 4-(1-Propybutyl)pyridine | 31.46 | 32.01 | 32.02 | -0.56 |
| 446 | m-Toluidine | 38.37 | 38.93 | 38.94 | -0.57 |
| 447 | 1,1-Dipropylhydrazine | 25.16 | 25.61 | 25.73 | -0.57 |
| 448 | 2,10-Dichloro-2,10-dimethylundecane | 30.78 | 31.38 | 31.35 | -0.57 |
| 449 | 1-Methylcyclohexene | 26.60 | 27.09 | 27.17 | -0.57 |
| 450 | Ethyl heptanoate | 25.50 | 24.90 | 24.92 | 0.58 |
| 451 | Triethylmethanol | 25.68 | 25.23 | 25.10 | 0.58 |
| 452 | 1-Bromodecane | 29.55 | 30.04 | 30.13 | -0.58 |
| 453 | Propyl butyrate | 25.06 | 24.50 | 24.48 | 0.58 |
| 454 | Decamethyltetrasiloxane | 16.20 | 16.71 | 16.78 | -0.58 |
| 455 | 3-Hexanone ketazine | 26.61 | 27.12 | 27.19 | -0.58 |
| 456 | s-Butylbenzene | 28.52 | 29.02 | 29.11 | -0.59 |
| 457 | 2-n-Propylthiophene | 29.68 | 30.25 | 30.27 | -0.59 |
| 458 | 1,3,5-Trimethylbenzene | 28.00 | 27.38 | 27.41 | 0.59 |
| 459 | Methyl methacrylate | 28.00 | 27.20 | 27.41 | 0.59 |
| 460 | Hexyl butoxyacetate | 27.59 | 26.93 | 27.00 | 0.59 |
| 461 | 2-Octanol | 26.32 | 26.90 | 26.91 | -0.59 |
| 462 | Methyl butoxyacetate | 28.12 | 28.67 | 28.71 | -0.59 |
| 463 | 3-Nitrotoluene | 40.99 | 40.01 | 40.40 | 0.59 |
| 464 | trans-Hexahydro-2-methyleneindan | 28.83 | 29.54 | 29.42 | -0.59 |
| 465 | 2-Chloro-2-methylheptane | 24.97 | 25.62 | 25.56 | -0.59 |
| 466 | 1-Hexyl-3-methylimidazolium tetracyanoborate | 41.50 | 42.90 | 42.09 | -0.59 |
| 467 | Diisopentyl sulfide | 25.97 | 25.32 | 25.37 | 0.60 |
| 468 | Diisobutyl carbonate | 25.31 | 24.82 | 24.71 | 0.60 |
| 469 | Dipentyl phosphite | 28.51 | 28.99 | 29.11 | -0.60 |
| 470 | 1,1,1,3,3,3-Hexachloro-2,2-difluoropropane | 32.60 | 33.15 | 32.00 | 0.60 |
| 471 | Bromodimethylphenylsilane | 28.65 | 29.25 |  | -0.60 |
| 472 | Ethyl 3,3-dimethylcyclopropane-trans-1,2-dicarboxylate | 30.65 | 31.20 | 31.25 | -0.60 |
| 473 | n-Valeraldehyde | 25.94 | 25.38 | 25.34 | 0.60 |
| 474 | Decylbenzene | 30.97 | 31.53 | 31.57 | -0.60 |
| 475 | 3-Hexanone oxime | 28.70 | 29.22 | 29.30 | -0.60 |
| 476 | Heptyl 3-methoxypropanoate | 28.86 | 29.47 | 29.47 | -0.61 |
| 477 | 1-Phenyl-2-butanone | 36.57 | 35.97 | 35.96 | 0.61 |
| 478 | Cyclopentyl ethyl ether | 26.12 | 26.70 | 26.73 | -0.61 |
| 479 | Dibutyl methylmalonate | 28.81 | 28.21 | 28.20 | 0.61 |
| 480 | Diisopentyl maleate | 28.60 | 29.12 | 29.21 | -0.61 |
| 481 | Propyl 3-propoxypropanoate | 26.99 | 26.33 | 26.38 | 0.61 |
| 482 | 4-Methylvaleronitrile | 27.06 | 27.77 | 27.67 | -0.61 |
| 483 | N-Hexylpyridinium bis(trifluoromethanesulfonyl) amide | 34.20 | 35.05 | 34.81 | -0.61 |
| 484 | Triethyl phosphite | 23.95 | 23.42 | 23.33 | 0.62 |
| 485 | 4-Heptanone O-ethyloxime | 24.76 | 24.19 | 24.14 | 0.62 |
| 486 | 1,3-Dipentylimidazolium bis(trifluoromethylsulfonyl) amide | 30.10 | 29.90 | 29.48 | 0.62 |
| 487 | Hexyl 3-pentyloxypropanoate | 27.94 | 27.33 | 27.32 | 0.62 |
| 488 | 4-Methyl-1-methylenecyclohexane | 24.72 | 25.27 | 25.34 | -0.62 |
| 489 | 2,3-Dimethylheptane | 21.46 | 20.96 | 20.84 | 0.62 |
| 490 | 3-Methylcyclohexanone | 31.21 | 30.59 | 30.59 | 0.62 |
| 491 | Perfluorohexane | 11.91 | 12.68 | 12.53 | -0.62 |
| 492 | Thiophene | 31.34 | 30.98 | 30.72 | 0.62 |
| 493 | Heptyl 3-Hexyloxypropanoate | 28.41 | 27.73 | 27.78 | 0.63 |
| 494 | Heptyl butoxyacetate | 27.75 | 27.13 | 27.12 | 0.63 |
| 495 | 1-Ethyl-3-methylimidazolium tetrafluoroborate | 44.30 | 44.54 | 44.93 | -0.63 |
| 496 | 2,3,5-Trimethylhexane | 20.38 | 19.83 | 19.75 | 0.63 |
| 497 | 3-Ethyl-3-hexanol | 25.99 | 25.43 | 25.36 | 0.63 |
| 498 | Methyl octanoate | 26.92 | 27.64 | 27.55 | -0.63 |
| 499 | 2,5-Dimethylhexane | 19.86 | 20.52 | 20.49 | -0.63 |
| 500 | t-Butyl nicotinate | 33.94 | 34.78 | 34.58 | -0.64 |
| 501 | Isobutyl formate | 23.90 | 24.55 | 24.54 | -0.64 |
| 502 | Dipropyl sulfide | 26.29 | 26.78 | 26.93 | -0.64 |
| 503 | Pentyl 3-ethoxypropanoate | 27.23 | 26.53 | 26.59 | 0.64 |
| 504 | Propyl propanoate | 23.68 | 24.30 | 24.32 | -0.64 |
| 505 | Di-n-butylether | 22.91 | 22.29 | 22.27 | 0.64 |
| 506 | Propyl isobutanoate | 22.78 | 23.37 | 23.42 | -0.64 |
| 507 | Bicyclohexyl | 32.74 | 32.16 | 32.09 | 0.65 |
| 508 | Diisopentyl disulfide | 28.46 | 29.08 | 29.11 | -0.65 |
| 509 | Propylcyclohexane | 26.33 | 27.03 | 26.98 | -0.65 |
| 510 | Methyl 3-butoxypropanoate | 28.27 | 28.87 | 28.92 | -0.65 |
| 511 | trans-Decalin | 30.50 | 31.28 | 31.15 | -0.65 |
| 512 | 1-Nitrobutane | 29.77 | 30.31 | 30.43 | -0.66 |
| 513 | Ethyl hexyl carbonate | 27.66 | 27.08 | 27.00 | 0.66 |
| 514 | 5-Chloro-5-methylnonane | 26.70 | 26.02 | 26.04 | 0.66 |
| 515 | Dibutyldisulfide | 30.55 | 30.94 | 31.21 | -0.66 |
| 516 | Dipentyl sulfite | 28.92 | 29.51 | 29.58 | -0.66 |
| 517 | Propyl 3-Hexyloxypropanoate | 27.59 | 26.93 | 26.92 | 0.67 |
| 518 | 1,6-Hexanediol dinitrate | 41.20 | 40.84 | 40.53 | 0.67 |
| 519 | Tridecanonitrile | 30.70 | 30.10 | 30.03 | 0.67 |
| 520 | Hexyl 3-butoxypropanoate | 27.74 | 27.13 | 27.07 | 0.67 |
| 521 | Triisobutyl phosphate | 26.40 | 26.02 | 27.07 | -0.67 |
| 522 | Dipentyl ethylphosphonate | 27.97 | 28.70 | 28.64 | -0.67 |
| 523 | Tridecane | 25.55 | 24.98 | 24.88 | 0.67 |
| 524 | Propyl trichloroacetate | 30.43 | 31.04 | 31.10 | -0.67 |
| 525 | 2-Butylthiophene | 29.75 | 30.45 | 30.42 | -0.67 |
| 526 | 2-t-Butylnaphthalene | 34.18 | 33.51 | 33.51 | 0.67 |
| 527 | 1-Chloroundecane | 29.30 | 28.61 | 28.62 | 0.68 |
| 528 | Octylbenzene | 30.46 | 31.07 | 31.14 | -0.68 |
| 529 | n-Butylformate | 25.03 | 25.68 | 25.71 | -0.68 |
| 530 | Eicosane | 28.56 | 28.06 | 27.87 | 0.69 |
| 531 | Butyl 3-butynoate | 29.42 | 30.06 | 30.11 | -0.69 |
| 532 | Ethyl 3-methoxypropanoate | 29.26 | 28.47 | 28.57 | 0.69 |
| 533 | 1-Pentanethiol | 26.35 | 25.75 | 25.66 | 0.69 |
| 534 | Dipropyl hexylphosphonate | 28.06 | 28.70 | 28.75 | -0.69 |
| 535 | Ethyl 3-Heptyloxypropanoate | 27.57 | 26.93 | 26.88 | 0.69 |
| 536 | 1,2-Dimethoxycyclohexane | 34.20 | 33.48 | 33.51 | 0.69 |
| 537 | 1-Hexanol | 26.21 | 26.83 | 26.90 | -0.69 |
| 538 | Butyl 3-Heptyloxypropanoate | 28.01 | 27.33 | 27.31 | 0.70 |
| 539 | 3-Methylbutanoic acid | 25.51 | 24.83 | 24.81 | 0.70 |
| 540 | Propanoic acid | 26.20 | 25.56 | 25.50 | 0.70 |
| 541 | 3,3-Dimethylpentane | 19.60 | 20.26 | 20.30 | -0.70 |
| 542 | Methyl 3-Hexyloxypropanoate | 28.54 | 29.27 | 29.24 | -0.70 |
| 543 | Tris(2-butoxyethyl) phosphite | 29.33 | 30.11 | 30.04 | -0.71 |
| 544 | 1-Decyl-1,8-diazabicyclo(5,4,0)undec-7-enium dicyanamide | 30.65 | 31.24 | 31.36 | -0.71 |
| 545 | N-Nitrosodipropylamine | 31.64 | 31.03 | 30.93 | 0.71 |
| 546 | Allyl isothiocyanate | 34.61 | 34.20 | 33.90 | 0.71 |
| 547 | Perfluorotributylamine | 16.30 | 17.01 |  | -0.71 |
| 548 | Dihexyl oxalate | 30.45 | 29.74 | 29.73 | 0.72 |
| 549 | Dibutyl oxalate | 29.63 | 28.94 | 28.91 | 0.72 |
| 550 | Methyl 3-pentyloxypropanoate | 28.37 | 29.07 | 29.09 | -0.72 |
| 551 | Di-n-propylsulfate | 32.03 | 32.75 |  | -0.72 |
| 552 | trans-1,3-Dimethylcyclohexane | 24.67 | 25.46 | 25.39 | -0.72 |
| 553 | Triethyl nitrilotriacetate | 34.67 | 35.01 | 35.39 | -0.72 |
| 554 | 4-Ethyltoluene | 29.44 | 28.65 | 28.72 | 0.72 |
| 555 | Perfluoro(butylcyclohexane) | 17.70 | 18.38 | 18.42 | -0.72 |
| 556 | 4-Chlorotoluene | 32.77 | 32.20 | 32.05 | 0.72 |
| 557 | Propyl cyclobutanecarboxylate | 29.15 | 28.51 | 28.42 | 0.73 |
| 558 | Tetrapropyl silicate | 23.58 | 23.23 | 22.85 | 0.73 |
| 559 | Di-n-hexylether | 23.78 | 23.09 | 23.05 | 0.73 |
| 560 | 4-(2-Thienyl)-1-butanol | 36.27 | 36.82 | 37.00 | -0.73 |
| 561 | Propyl mesaconate | 30.91 | 31.68 | 31.64 | -0.73 |
| 562 | 1-Octyl-1,8-diazabicyclo(5,4,0)undec-7-enium dicyanamide | 31.61 | 30.84 | 30.88 | 0.73 |
| 563 | 3-Ethylpentane | 20.46 | 21.21 | 21.19 | -0.73 |
| 564 | 1-Butyl-3-methylimidazolium trifluoromethylsulfonate | 35.52 | 35.98 | 36.26 | -0.74 |
| 565 | Acetonitrile | 28.66 | 27.90 | 27.92 | 0.74 |
| 566 | Diethyl disulfide | 30.91 | 30.14 | 30.17 | 0.74 |
| 567 | 4-Chloro-4-methyldecane | 26.93 | 26.22 | 26.19 | 0.74 |
| 568 | 1,1-Dipentylhydrazine | 26.95 | 26.41 | 26.21 | 0.74 |
| 569 | 4-Chloro-4-methyloctane | 26.47 | 25.82 | 25.73 | 0.74 |
| 570 | Methyl ethylpropylmalonate | 30.53 | 31.26 | 31.27 | -0.74 |
| 571 | Chloroacetic acid ethylester | 31.83 | 31.05 | 31.09 | 0.74 |
| 572 | 5-Decanone | 26.63 | 27.38 | 27.37 | -0.74 |
| 573 | 3-Methylmethylenecyclohexane | 24.70 | 25.27 | 25.44 | -0.74 |
| 574 | 1-Octyl-3-methylimidazolium bis(trifluoromethanesulfonyl) amide | 31.93 | 32.93 | 32.67 | -0.74 |
| 575 | Bis(perfluorobutyl) 3-methylglutarate | 20.50 | 21.07 | 21.24 | -0.74 |
| 576 | Propyl 3-Heptyloxypropanoate | 27.87 | 27.13 | 27.12 | 0.75 |
| 577 | Ethoxybenzene | 33.46 | 32.82 | 32.71 | 0.75 |
| 578 | Isopentyl butanoate | 24.48 | 23.77 | 23.73 | 0.75 |
| 579 | 2,2,4,4-Tetramethylpentane | 19.91 | 19.06 | 19.16 | 0.75 |
| 580 | 1-Heptyl-3-methylimidazolium bis(trifluoromethanesulfonyl) amide | 32.00 | 32.73 | 32.75 | -0.75 |
| 581 | 2,6-Dimethylheptan-4-one | 25.54 | 24.92 | 24.79 | 0.75 |
| 582 | 2-Methoxy-4-methyl-1,3,2-dioxaphospholane | 29.65 | 30.37 | 30.40 | -0.75 |
| 583 | beta-Ethyl-alpha-methylstyrene | 32.25 | 31.66 | 31.49 | 0.76 |
| 584 | (Isopropylthio)benzene | 33.46 | 34.22 |  | -0.76 |
| 585 | 2-Propyn-1-hexanoate | 29.46 | 30.26 | 30.22 | -0.76 |
| 586 | Dibutyl thiosulfate | 29.28 | 29.79 | 30.04 | -0.76 |
| 587 | Propyl 9-decynoate | 31.74 | 31.06 | 30.98 | 0.76 |
| 588 | 1,5-Pentanediol bis(perfluorooctanoate) | 19.10 | 18.64 | 18.34 | 0.76 |
| 589 | 4-Octanone | 26.15 | 26.98 | 26.91 | -0.76 |
| 590 | Diisobutyl disulfide | 27.97 | 28.68 | 28.73 | -0.76 |
| 591 | n-Propyl benzoate | 34.41 | 33.69 | 33.65 | 0.76 |
| 592 | Octylcyanide | 28.50 | 29.30 | 29.26 | -0.76 |
| 593 | 1-Bromooctane | 28.89 | 29.64 | 29.65 | -0.76 |
| 594 | Dimethyl azelate | 35.32 | 34.62 | 34.55 | 0.77 |
| 595 | Butyl hydrocinnamate | 33.49 | 34.29 | 34.26 | -0.77 |
| 596 | Butyl cyclobutanecarboxylate | 29.35 | 28.71 | 28.58 | 0.77 |
| 597 | 4-Heptanone O-propyloxime | 24.96 | 24.39 | 24.19 | 0.77 |
| 598 | Pentyl butoxyacetate | 27.41 | 26.73 | 26.64 | 0.77 |
| 599 | cis-2-Octene | 21.91 | 22.74 | 22.68 | -0.77 |
| 600 | Propyl citraconate | 31.08 | 31.68 | 31.85 | -0.77 |
| 601 | Propyl dichloroacetate | 30.74 | 31.79 | 31.51 | -0.77 |
| 602 | 1-Pentanol | 25.79 | 26.63 | 26.56 | -0.77 |
| 603 | 2-Chloroaniline | 43.66 | 42.95 | 42.88 | 0.78 |
| 604 | Ethyl 3-butynoate | 30.43 | 29.66 | 29.65 | 0.78 |
| 605 | 1-Butyl-1-methylpyrrolidinium acetate | 37.40 | 38.32 | 38.18 | -0.78 |
| 606 | Ethyl 2-cyano-3-ethylhexanoate | 30.47 | 31.28 | 31.25 | -0.78 |
| 607 | 2-Octyloxyethanol | 29.80 | 29.06 | 29.02 | 0.78 |
| 608 | 1,8-Diiodooctane | 43.25 | 43.66 | 44.03 | -0.78 |
| 609 | Propyl cyclopropanecarboxylate | 29.00 | 28.31 | 28.22 | 0.78 |
| 610 | 1,4-Bis(butanoyloxy)-2-butyne | 33.15 | 32.44 | 32.37 | 0.78 |
| 611 | n-Hexylacetate | 25.53 | 24.70 | 24.74 | 0.79 |
| 612 | Nopinene | 26.82 | 27.46 | 27.61 | -0.79 |
| 613 | Methyl 10-undecenoate | 29.95 | 28.96 | 29.16 | 0.79 |
| 614 | Butanoic acid | 26.51 | 25.76 | 25.72 | 0.79 |
| 615 | 1-Butyl-3-methylimidazolium thiocyanate | 47.45 | 47.96 | 48.24 | -0.79 |
| 616 | Butyl cyanoacetate | 32.00 | 32.74 | 32.80 | -0.80 |
| 617 | 5-Butyl-5-decanol | 27.29 | 26.63 | 26.49 | 0.80 |
| 618 | Methyl 1,1-cyclopentanedicarboxylate | 35.21 | 36.00 | 36.01 | -0.80 |
| 619 | Bromotrimethylsilane | 20.38 | 19.58 |  | 0.80 |
| 620 | Heptyl 3-propoxypropanoate | 27.88 | 27.13 | 27.08 | 0.80 |
| 621 | 3,12-Dichloro-3,12-diethyltetradecane | 33.33 | 32.38 | 32.53 | 0.80 |
| 622 | 1-Chloroheptane | 27.02 | 27.81 | 27.82 | -0.80 |
| 623 | Butyl 3-Hexyloxypropanoate | 27.84 | 27.13 | 27.04 | 0.80 |
| 624 | N,N-Dibutylaniline | 32.30 | 32.81 | 33.10 | -0.80 |
| 625 | 2-Methyl-3-pentanol | 24.60 | 25.37 | 25.40 | -0.80 |
| 626 | 2-Pentyloxyethanol | 27.60 | 28.46 | 28.40 | -0.80 |
| 627 | 1,1-Di(2-chloroethoxy)ethane | 36.22 | 37.01 | 37.02 | -0.80 |
| 628 | 3,6-Dichloro-3,6-diethyloctane | 31.80 | 31.18 | 30.99 | 0.81 |
| 629 | 2-Hexylthiophene | 30.08 | 30.85 | 30.89 | -0.81 |
| 630 | Dibutyl acetylenedicarboxylate | 31.72 | 32.44 | 32.53 | -0.81 |
| 631 | Acetone oxime | 29.26 | 28.62 | 28.44 | 0.82 |
| 632 | Methyl cyclobutane-1,1-dicarboxylate | 35.11 | 35.80 | 35.93 | -0.82 |
| 633 | Pentyl 3-Heptyloxypropanoate | 28.32 | 27.53 | 27.50 | 0.82 |
| 634 | Methyl hexadecanoate | 29.95 | 29.24 | 29.13 | 0.82 |
| 635 | Ethyl 2-cyano-3-propylcrotonate | 33.21 | 34.26 | 34.03 | -0.82 |
| 636 | Isobutyl butanoate | 22.78 | 23.57 | 23.60 | -0.82 |
| 637 | 1,4-Bis(valeroyloxy)-2-butyne | 32.03 | 32.84 | 32.85 | -0.82 |
| 638 | 3-Pentanone O-propyloxime | 24.73 | 23.99 | 23.90 | 0.83 |
| 639 | 2-Nonanone | 26.39 | 27.18 | 27.22 | -0.83 |
| 640 | Ethyl 3-pentyloxypropanoate | 27.36 | 26.53 | 26.53 | 0.83 |
| 641 | Isohexylamine | 23.39 | 24.58 | 24.22 | -0.83 |
| 642 | Methyl 3-ethyl-3-methylglutarate | 32.04 | 31.26 | 31.21 | 0.83 |
| 643 | Bis(7-H-perfluoroheptyl) adipate | 26.10 | 26.44 | 26.93 | -0.83 |
| 644 | 4-Heptanone | 25.99 | 26.78 | 26.82 | -0.83 |
| 645 | Chlorocyclopentane | 30.40 | 29.85 | 29.56 | 0.84 |
| 646 | 1,9-Dibromononane | 39.55 | 38.62 | 38.71 | 0.84 |
| 647 | Isooctane | 18.77 | 19.57 | 19.61 | -0.84 |
| 648 | Heptyl 3-pentyloxypropanoate | 28.34 | 27.53 | 27.50 | 0.84 |
| 649 | n-Propyl cinnamate | 36.59 | 35.73 | 35.75 | 0.84 |
| 650 | 1-Propyl-3-methylimidazolium acetate | 36.80 | 37.67 | 37.64 | -0.84 |
| 651 | 2-Pentanone O-propyloxime | 24.63 | 23.99 | 23.79 | 0.84 |
| 652 | Hexyl 3-ethoxypropanoate | 27.63 | 26.73 | 26.78 | 0.85 |
| 653 | Propyl fumarate | 31.01 | 31.84 | 31.86 | -0.85 |
| 654 | Hexyl 3-Hexyloxypropanoate | 28.35 | 27.53 | 27.50 | 0.85 |
| 655 | 3-Methyl-3-nonanol | 26.55 | 25.83 | 25.70 | 0.85 |
| 656 | Tetradecane | 26.14 | 25.42 | 25.29 | 0.85 |
| 657 | Ethyl 3-butoxypropanoate | 27.23 | 26.33 | 26.38 | 0.85 |
| 658 | Butyl phenylacetate | 33.33 | 34.09 | 34.19 | -0.86 |
| 659 | Heptyl 3-butoxypropanoate | 28.17 | 27.33 | 27.31 | 0.86 |
| 660 | 3-Methyl-1-butanethiol | 25.60 | 24.62 | 24.74 | 0.86 |
| 661 | Octadecane | 27.87 | 27.18 | 27.01 | 0.86 |
| 662 | 1-Nonyl-3-methylimidazolium bis(trifluoromethanesulfonyl) amide | 32.00 | 33.13 | 32.86 | -0.86 |
| 663 | Perfluoroheptane | 13.19 | 12.29 | 12.33 | 0.86 |
| 664 | Methyl pentadecanoate | 29.79 | 29.04 | 28.93 | 0.86 |
| 665 | 2,6-Lutidine | 31.65 | 31.35 | 30.79 | 0.86 |
| 666 | 2-Heptylthiophene | 30.40 | 31.05 | 31.26 | -0.86 |
| 667 | Diisopentyl sulfite | 27.86 | 27.25 | 26.99 | 0.87 |
| 668 | 1-Butyl-3-methylimidazolium tricyanomethanide | 47.04 | 46.17 |  | 0.87 |
| 669 | n-Propylbromoacetate | 31.96 | 32.88 | 32.83 | -0.87 |
| 670 | 2,2,3-Trimethylhexane | 20.97 | 20.01 | 20.10 | 0.87 |
| 671 | 2-Isopropylnaphthalene | 35.01 | 34.23 | 34.14 | 0.87 |
| 672 | 3-Dodecanol | 28.60 | 27.70 | 27.73 | 0.87 |
| 673 | Dimethyl butyl isopropylammonium bis(trifluoromethylsulfonyl)amide | 32.80 | 31.99 | 31.93 | 0.87 |
| 674 | Dibutoxymethane | 24.57 | 24.59 | 23.70 | 0.87 |
| 675 | 3-Hexanone O-propyloxime | 25.00 | 24.19 | 24.13 | 0.87 |
| 676 | Ethyl 1,1-cyclohexanedicarboxylate | 32.99 | 33.66 | 33.87 | -0.88 |
| 677 | 6-Chloro-6-methyldodecane | 27.46 | 26.62 | 26.58 | 0.88 |
| 678 | Methyl hydrocinnamate | 37.30 | 36.43 | 36.42 | 0.88 |
| 679 | Cetane | 27.05 | 26.30 | 26.17 | 0.88 |
| 680 | Perfluoro-2-methylbutane | 10.48 | 11.15 | 11.36 | -0.88 |
| 681 | Propanone | 25.14 | 25.98 | 26.02 | -0.88 |
| 682 | 2-Nitrobutane | 29.53 | 30.08 | 30.41 | -0.88 |
| 683 | 1,1-Diisobutoxyethane | 22.40 | 21.25 | 21.52 | 0.88 |
| 684 | Methyl 1,1-cyclopropanedicarboxylate | 36.41 | 35.60 | 35.52 | 0.89 |
| 685 | 2-Phenyl-3-methyl-2-butene | 32.04 | 31.30 | 31.15 | 0.89 |
| 686 | 2,3,4-Trimethylpentane | 20.24 | 19.39 | 19.35 | 0.89 |
| 687 | trans-2-Methylenedecalin | 30.84 | 29.77 | 29.95 | 0.89 |
| 688 | 5-Ethyl-5-decanol | 27.02 | 26.23 | 26.13 | 0.89 |
| 689 | 1,8-Dichlorooctane | 36.11 | 35.16 | 35.21 | 0.90 |
| 690 | Dimethyl sulfite | 33.97 | 33.39 | 33.07 | 0.90 |
| 691 | Heptyl bromide | 28.56 | 29.44 | 29.46 | -0.90 |
| 692 | 2-n-Hexoxyethanol | 27.70 | 28.66 | 28.60 | -0.90 |
| 693 | Amylbenzene | 29.45 | 30.38 | 30.35 | -0.90 |
| 694 | Methylbenzene | 28.52 | 29.46 | 29.42 | -0.90 |
| 695 | 3-Chloro-3-methyloctane | 26.69 | 25.82 | 25.78 | 0.91 |
| 696 | 5-Chloro-5-propyldecane | 27.44 | 26.62 | 26.53 | 0.91 |
| 697 | Trichloroethylene | 28.80 | 27.89 |  | 0.91 |
| 698 | Isobutylyl cyanoacetate | 30.66 | 31.61 | 31.57 | -0.91 |
| 699 | 5-Methyl-5-nonanol | 26.70 | 25.83 | 25.79 | 0.91 |
| 700 | Ethyl 3-Hexyloxypropanoate | 27.63 | 26.73 | 26.72 | 0.91 |
| 701 | 2-Pentanoylthiophene | 35.65 | 36.77 | 36.56 | -0.91 |
| 702 | 3-Methyl-3-octanol | 26.52 | 25.63 | 25.60 | 0.92 |
| 703 | Pentyl 3-Hexyloxypropanoate | 28.20 | 27.33 | 27.28 | 0.92 |
| 704 | Ethyl citraconate | 32.15 | 31.48 | 31.23 | 0.92 |
| 705 | 3-Chloro-3-methylnonane | 26.83 | 26.02 | 25.91 | 0.92 |
| 706 | Diisopropyl adipate | 29.33 | 28.68 | 28.41 | 0.92 |
| 707 | Ethyl 2-cyano-3-methylhexanoate | 30.11 | 31.08 | 31.03 | -0.92 |
| 708 | trans-1,2-Dichloroethylene | 25.00 | 25.92 |  | -0.92 |
| 709 | Dipropylamine | 22.82 | 23.47 | 23.74 | -0.92 |
| 710 | Butyl 3-butenoate | 26.58 | 25.42 | 25.65 | 0.93 |
| 711 | 2-Methylpropanoic acid | 25.55 | 24.63 | 24.62 | 0.93 |
| 712 | Amyl formate | 25.02 | 25.88 | 25.95 | -0.93 |
| 713 | 1,4-Difluorobenzene | 27.00 | 27.60 | 27.93 | -0.93 |
| 714 | n-Octanoic acid | 27.50 | 26.56 | 26.57 | 0.93 |
| 715 | Acetone O-ethyloxime | 22.48 | 23.39 | 23.41 | -0.93 |
| 716 | Diisopropyl acetylenedicarboxylate | 30.67 | 31.38 | 31.61 | -0.94 |
| 717 | Ethyl 3-hydroxyatropate | 37.67 | 38.21 | 38.61 | -0.94 |
| 718 | Di-n-butylamine | 24.60 | 23.87 | 23.66 | 0.94 |
| 719 | 1-Decyl-3-methylimidazolium bis(trifluoromethanesulfonyl) amide | 32.20 | 33.33 | 33.14 | -0.94 |
| 720 | cis-1,4-Dimethylcyclohexane | 24.43 | 25.46 | 25.37 | -0.94 |
| 721 | 3-Ethyl-2-methylhexane | 21.87 | 20.96 | 20.92 | 0.95 |
| 722 | 1,3-Dihexylimidazolium bis(trifluoromethylsulfonyl) amide | 29.50 | 30.30 | 30.45 | -0.95 |
| 723 | 1-(2-Hydroxyethyl)-3-methylimidazolium tris(pentafluoroethyl)trifluorophosphate | 38.70 | 38.40 | 37.75 | 0.95 |
| 724 | Octane | 21.78 | 22.78 | 22.73 | -0.95 |
| 725 | Ethyl isobutyrate | 22.19 | 23.17 | 23.14 | -0.95 |
| 726 | Dioctyl ethylphosphonate | 28.99 | 29.90 | 29.94 | -0.95 |
| 727 | Bis(2-propoxyethyl)phosphite | 30.97 | 31.85 | 31.92 | -0.95 |
| 728 | Ethyl 3-methyl-1,1-cyclohexanedicarboxylate | 31.73 | 32.73 | 32.69 | -0.96 |
| 729 | (2-Bromoethyl)benzene | 38.92 | 38.23 | 37.96 | 0.96 |
| 730 | Dimethylketazine | 26.67 | 25.92 | 25.71 | 0.96 |
| 731 | Isopentylbenzene | 28.34 | 29.25 | 29.30 | -0.96 |
| 732 | 2-Bromotoluene | 34.63 | 35.39 | 35.59 | -0.96 |
| 733 | Ethanesulfonic acid | 44.09 | 45.05 |  | -0.96 |
| 734 | Diethyl chlorofumarate | 33.20 | 32.43 | 32.23 | 0.97 |
| 735 | Butyl 1-naphthoate | 38.18 | 39.21 | 39.15 | -0.97 |
| 736 | 4-(2,2,6-Trimethyl-2-cyclohexenyl)-2-butanol acetate | 29.59 | 28.78 | 28.62 | 0.97 |
| 737 | Tris(2-pentoxyethyl) phosphite | 29.62 | 30.71 | 30.59 | -0.97 |
| 738 | 2-Chlorooctane | 26.40 | 25.51 | 25.42 | 0.98 |
| 739 | 1-Chlorooctane | 27.15 | 28.01 | 28.13 | -0.98 |
| 740 | Hexyl 3-Heptyloxypropanoate | 28.71 | 27.73 | 27.73 | 0.98 |
| 741 | Ethylcyclohexane | 25.57 | 26.59 | 26.55 | -0.98 |
| 742 | Heptyl 3-Heptyloxypropanoate | 28.77 | 27.93 | 27.79 | 0.98 |
| 743 | 3,11-Dichloro-3,11-diethyltridecane | 33.05 | 32.18 | 32.06 | 0.99 |
| 744 | 3,4-Dimethylheptane | 21.91 | 20.96 | 20.92 | 0.99 |
| 745 | Diethyleneglycol-di-n-butylether | 27.00 | 25.95 | 26.01 | 0.99 |
| 746 | 3-Chloro-3-methylpentane | 24.23 | 25.22 | 25.22 | -0.99 |
| 747 | Bis(2-ethylhexyl) adipate | 30.20 | 29.08 | 29.21 | 0.99 |
| 748 | Perfluoro-1,4-dimethylcyclohexane | 16.30 | 17.24 | 17.29 | -0.99 |
| 749 | 1-Ethyl-3-methylimidazolium acetate | 38.10 | 37.47 | 37.11 | 0.99 |
| 750 | 2,2,3,3,4,4,5,5-Octafluoro-1-pentanol | 24.50 | 25.44 | 25.49 | -0.99 |
| 751 | N-Butyl-2-methylpyridinium bis(trifluoromethanesulfonyl) amide | 36.50 | 37.49 |  | -0.99 |
| 752 | Dipropyl ethylmalonate | 28.99 | 28.01 | 27.99 | 1.00 |
| 753 | Ethyl 2-cyano-3,3-diethylacrylate | 33.51 | 34.26 | 34.51 | -1.00 |
| 754 | 2-Ethoxyethanol | 28.80 | 27.86 | 27.80 | 1.00 |
| 755 | 3-Methyl-4-(2,2,6-trimethyl-2-cyclohexenyl)-2-butanol | 30.63 | 29.98 | 29.63 | 1.00 |
| 756 | Allyl butyrate | 26.13 | 25.22 | 25.13 | 1.00 |
| 757 | Methyl alpha-bromo-cis-cinnamate | 43.48 | 44.48 |  | -1.00 |
| 758 | Hexanenitrile | 27.83 | 28.70 | 28.84 | -1.01 |
| 759 | Isopropylcyclopentane | 24.38 | 25.46 | 25.39 | -1.01 |
| 760 | Heptanonitrile | 27.75 | 28.90 | 28.76 | -1.01 |
| 761 | Butylbenzene | 29.23 | 30.15 | 30.24 | -1.01 |
| 762 | 2,2,3,3,4,4,5,5,6,6,7,7-Dodecafluoro-1-heptanol | 23.80 | 24.66 | 24.81 | -1.01 |
| 763 | Dibutyl acetal | 24.44 | 23.51 | 23.42 | 1.02 |
| 764 | Ethyl 3-butenoate | 26.16 | 25.02 | 25.14 | 1.02 |
| 765 | 3-(Butylamino)propionitrile | 30.80 | 31.91 | 31.82 | -1.02 |
| 766 | Dimethyl thiosulfate | 32.76 | 33.78 |  | -1.02 |
| 767 | 1,4,7,10-Tetraoxahexadecane | 31.00 | 32.32 | 32.02 | -1.02 |
| 768 | 3,5-Dimethylisoxazole | 32.89 | 33.91 |  | -1.02 |
| 769 | Diisopentyl oxalate | 28.09 | 27.08 | 27.06 | 1.03 |
| 770 | Phenylpropylether | 32.16 | 33.02 | 33.19 | -1.03 |
| 771 | cis-Decalin | 32.18 | 31.28 | 31.15 | 1.03 |
| 772 | Caprylonitrile | 28.10 | 29.10 | 29.13 | -1.03 |
| 773 | 4-Chloro-4-methylnonane | 26.99 | 26.02 | 25.96 | 1.03 |
| 774 | 3-Pentylpyridine | 31.61 | 32.74 | 32.65 | -1.04 |
| 775 | Butyl 2-picolinate | 35.86 | 36.82 | 36.90 | -1.04 |
| 776 | Dipropyl phosphite | 29.25 | 28.19 | 28.21 | 1.04 |
| 777 | t-Pentylbenzene | 29.02 | 28.30 | 27.98 | 1.04 |
| 778 | 1-Butanol | 25.39 | 26.43 | 26.43 | -1.04 |
| 779 | 3-Chloro-3-ethylpentane | 26.36 | 25.42 | 25.32 | 1.04 |
| 780 | 4-Methylvaleronitrile | 26.53 | 27.57 | 27.57 | -1.04 |
| 781 | Diethylene glycol monohexyl ether | 29.60 | 30.49 | 30.64 | -1.04 |
| 782 | Ethyl cyclopropanecarboxylate | 29.08 | 28.11 | 28.04 | 1.04 |
| 783 | 3-Hexanone | 25.58 | 26.58 | 26.62 | -1.04 |
| 784 | Ethyl 4-methyl-1,1-cyclohexanedicarboxylate | 31.74 | 32.73 | 32.78 | -1.04 |
| 785 | Methyl 3-Heptyloxypropanoate | 28.33 | 29.47 | 29.38 | -1.05 |
| 786 | Butyronitrile | 27.44 | 28.30 | 28.49 | -1.05 |
| 787 | Propyl isonicotinate | 35.22 | 36.38 | 36.27 | -1.05 |
| 788 | Tripropyl borate | 22.48 | 23.44 | 23.54 | -1.06 |
| 789 | 4,13-Dichloro-4,13-dipropylhexadecane | 32.00 | 33.18 | 33.06 | -1.06 |
| 790 | 2-Methyl-2-hexanol | 24.18 | 25.23 | 25.25 | -1.07 |
| 791 | 4-Heptylpyridine | 32.18 | 33.14 | 33.25 | -1.07 |
| 792 | 2,3,3-Trimethylpentane | 20.66 | 19.57 | 19.59 | 1.07 |
| 793 | 1-o-tolyl-1-p-tolylethane | 35.50 | 36.45 | 36.57 | -1.07 |
| 794 | Dihexyl ethylphosphonate | 28.07 | 29.10 | 29.14 | -1.07 |
| 795 | Dipentyl acetylenedicarboxylate | 31.42 | 32.84 | 32.49 | -1.07 |
| 796 | Methyl benzoate | 37.17 | 36.03 | 36.09 | 1.08 |
| 797 | Ethyl dichloroacetate | 32.57 | 31.59 | 31.49 | 1.08 |
| 798 | Hexamethyldisiloxane | 15.48 | 16.07 | 16.56 | -1.08 |
| 799 | 5-Chloro-5-butyldecane | 27.90 | 26.82 | 26.82 | 1.08 |
| 800 | Propyl butoxyacetate | 27.40 | 26.33 | 26.32 | 1.08 |
| 801 | trans-2-Decalone | 36.12 | 35.00 | 35.04 | 1.08 |
| 802 | 4-Heptanone ketazine | 26.57 | 27.52 | 27.65 | -1.08 |
| 803 | Bis(2-butoxyethyl)phosphite | 30.96 | 32.25 | 32.05 | -1.09 |
| 804 | 1-Hexyl-3-methylimidazolium tris(pentafluoroethyl)trifluorophosphate | 31.81 | 32.83 | 32.90 | -1.09 |
| 805 | Tributylamine | 24.39 | 23.49 | 23.30 | 1.09 |
| 806 | Ethyl hydrocinnamate | 35.02 | 33.89 | 33.93 | 1.09 |
| 807 | Isobutylcyclopentane | 24.73 | 25.90 | 25.82 | -1.09 |
| 808 | Isocumene | 28.98 | 29.92 | 30.07 | -1.09 |
| 809 | Diethylketone | 25.26 | 26.38 | 26.35 | -1.09 |
| 810 | Dipropoxymethane | 23.26 | 24.19 | 24.35 | -1.09 |
| 811 | o-Toluidine | 40.03 | 38.93 | 38.94 | 1.09 |
| 812 | 1-Nonene | 23.02 | 22.05 | 21.92 | 1.10 |
| 813 | Cyclohexene | 26.17 | 27.22 | 27.27 | -1.10 |
| 814 | 1,7-Dichloroheptane | 36.03 | 34.96 | 34.93 | 1.10 |
| 815 | Pentyl 3-butenoate | 26.78 | 25.62 | 25.68 | 1.10 |
| 816 | 2-Propyn-1-heptanoate | 29.68 | 30.46 | 30.78 | -1.10 |
| 817 | Dipropyl cyclopropane-1,1-dicarboxylate | 30.99 | 32.00 | 32.09 | -1.10 |
| 818 | Pentadecane | 27.07 | 25.86 | 25.96 | 1.11 |
| 819 | Diheptyl phosphite | 28.72 | 29.79 | 29.83 | -1.11 |
| 820 | Propyl allylmalonate | 29.29 | 30.19 | 30.40 | -1.11 |
| 821 | Dimethyl 2-butynedioate | 37.91 | 36.72 | 36.79 | 1.12 |
| 822 | Benzophenone | 44.05 | 45.16 | 45.17 | -1.12 |
| 823 | N-(3-Hydroxypropyl)pyridinium tris(pentafluoroethyl)trifluorophosphate | 39.98 | 41.12 | 41.11 | -1.13 |
| 824 | 2-Bromobutane | 25.01 | 26.31 | 26.14 | -1.13 |
| 825 | Diheptyl ethylphosphonate | 28.47 | 29.50 | 29.60 | -1.13 |
| 826 | Anethole | 35.14 | 36.33 | 36.27 | -1.13 |
| 827 | Dipentyloxymethane | 25.97 | 24.99 | 24.83 | 1.14 |
| 828 | n-Propyliodoacetate | 34.44 | 35.50 | 35.58 | -1.14 |
| 829 | Ethyl 3,3-dimethylglutarate | 29.65 | 28.52 | 28.51 | 1.14 |
| 830 | Diisopropyl disulfide | 28.37 | 27.72 | 27.23 | 1.14 |
| 831 | Propyl glycolate | 31.55 | 30.47 | 30.41 | 1.14 |
| 832 | 5-Chloro-5-methylundecane | 27.50 | 26.42 | 26.36 | 1.14 |
| 833 | Butyl phenyl sulfide | 34.50 | 35.83 | 35.64 | -1.14 |
| 834 | Nitroisobutane | 28.37 | 29.18 | 29.51 | -1.14 |
| 835 | 1-Hexylnaphthalene | 35.06 | 36.05 | 36.20 | -1.14 |
| 836 | Methyl alpha-bromocinnamate | 45.63 | 44.48 |  | 1.15 |
| 837 | Phenylisothiocyanate | 40.56 | 40.47 | 39.41 | 1.15 |
| 838 | Hexachlorobutadiene | 36.00 | 36.40 | 37.15 | -1.15 |
| 839 | Nonadecane | 28.59 | 27.62 | 27.44 | 1.15 |
| 840 | Ethyl 9-decynoate | 31.97 | 30.86 | 30.82 | 1.15 |
| 841 | 1,5-Pentanediol bis(perfluorobutyrate) | 20.60 | 21.76 | 21.75 | -1.15 |
| 842 | Ethyl 4-pyridinecarboxylate | 37.15 | 36.18 | 36.00 | 1.15 |
| 843 | 1-Ethyl-3-methylimidazolium butyltrifluoroborate | 34.20 | 35.35 |  | -1.15 |
| 844 | Tripropyl phosphite | 25.06 | 24.02 | 23.90 | 1.16 |
| 845 | Dimethyl methylmalonate | 33.51 | 32.49 | 32.35 | 1.16 |
| 846 | 2,2-Dimethylhexane | 19.61 | 20.70 | 20.77 | -1.16 |
| 847 | n-Butyltrichloroacetate | 30.18 | 31.24 | 31.34 | -1.16 |
| 848 | n-Propylvinylacetate | 26.29 | 25.22 | 25.13 | 1.16 |
| 849 | Propyl 3-ethoxypropanoate | 27.25 | 26.13 | 26.08 | 1.17 |
| 850 | Diethyl sulfate | 33.52 | 32.35 |  | 1.17 |
| 851 | Acrylic acid | 27.60 | 26.28 | 26.43 | 1.17 |
| 852 | t-Butylacetate | 21.38 | 22.50 | 22.55 | -1.17 |
| 853 | Furfuranol | 38.00 | 36.83 |  | 1.17 |
| 854 | 1,6-Dichlorohexane | 35.99 | 34.76 | 34.81 | 1.18 |
| 855 | (Chloromethyl)benzene | 37.50 | 36.40 | 36.32 | 1.18 |
| 856 | Diheptyl oxalate | 31.29 | 30.14 | 30.11 | 1.18 |
| 857 | Propyl thiocyanate | 32.74 | 33.51 | 33.92 | -1.18 |
| 858 | 2-Chloro-2-methylhexane | 24.15 | 25.42 | 25.33 | -1.18 |
| 859 | Ethyl cyclohexane-1,1-diacetate | 32.98 | 34.06 | 34.16 | -1.18 |
| 860 | 3-(6-Hydroxyhexyl)-1-methylimidazolium chloride | 50.00 | 49.85 | 51.19 | -1.19 |
| 861 | Diethyl propylmalonate | 28.93 | 27.81 | 27.74 | 1.19 |
| 862 | 4-Methyl-1-pentanol | 24.44 | 25.70 | 25.63 | -1.19 |
| 863 | 2-(2-Dodecyloxyethoxy)ethanol | 30.60 | 31.69 | 31.79 | -1.19 |
| 864 | 2-Methylthiophene | 30.83 | 29.85 | 29.64 | 1.19 |
| 865 | Allylamine | 24.92 | 25.83 | 26.11 | -1.19 |
| 866 | Phenyltrimethylsilane | 24.69 | 23.50 |  | 1.19 |
| 867 | 1-Chlorododecane | 29.87 | 28.81 | 28.68 | 1.19 |
| 868 | 3,4-Diethylhexane | 22.62 | 21.40 | 21.43 | 1.19 |
| 869 | s-Butylcyclohexane | 27.46 | 26.34 | 26.27 | 1.19 |
| 870 | Ethyl butoxyacetate | 27.39 | 26.13 | 26.20 | 1.19 |
| 871 | 1-Propylnaphthalene | 36.70 | 35.36 | 35.51 | 1.19 |
| 872 | 1,1,2,2-Tetrachloroethane | 35.58 | 35.04 | 34.38 | 1.20 |
| 873 | 1-Decyne | 25.93 | 26.92 | 27.13 | -1.20 |
| 874 | 3,8-Dichloro-3,8-diethyldecane | 32.63 | 31.58 | 31.43 | 1.20 |
| 875 | 1-Fluoropentane | 20.06 | 21.03 | 21.26 | -1.20 |
| 876 | Benzyl ethyl ether | 32.18 | 31.08 | 30.97 | 1.21 |
| 877 | Trioctyl phosphite | 28.31 | 27.02 | 27.10 | 1.21 |
| 878 | 1,6-Diiodohexane | 44.49 | 43.26 | 43.28 | 1.21 |
| 879 | N-Nitrosodibutylamine | 30.36 | 31.43 | 31.57 | -1.21 |
| 880 | Trihexyl tetradecyl phosphonium decanoate | 29.00 | 28.30 | 27.79 | 1.21 |
| 881 | Pentanenitrile | 27.44 | 28.50 | 28.65 | -1.21 |
| 882 | Diheptyl sulfide | 29.32 | 28.38 | 28.10 | 1.22 |
| 883 | Ethyl crotonate | 27.18 | 25.94 | 25.96 | 1.22 |
| 884 | s-Butyl vinyl ether | 20.76 | 21.81 | 21.98 | -1.22 |
| 885 | beta-Propylstyrene | 33.23 | 32.02 | 32.01 | 1.22 |
| 886 | Pinacolone | 23.43 | 24.50 | 24.65 | -1.22 |
| 887 | Butyl phenylpropiolate | 36.21 | 37.39 | 37.44 | -1.23 |
| 888 | 1,5-Pentanediol bis(trifluoroacetate) | 24.40 | 23.32 | 23.17 | 1.23 |
| 889 | 1-Butoxy-1-t-butoxyethane | 22.65 | 21.71 | 21.42 | 1.23 |
| 890 | Ethyl 3-propoxypropanoate | 27.33 | 26.13 | 26.10 | 1.23 |
| 891 | n-Butylchloroacetate | 30.22 | 31.45 | 31.45 | -1.23 |
| 892 | Methyl mesaconate | 35.27 | 34.02 | 34.04 | 1.23 |
| 893 | Butyl bromoacetate | 31.87 | 33.08 | 33.10 | -1.23 |
| 894 | Dimethyl hexyl isopropylammonium bis(trifluoromethylsulfonyl)amide | 31.40 | 32.39 | 32.63 | -1.23 |
| 895 | 1-Phenyl-2-pentanone | 34.91 | 36.17 | 36.15 | -1.24 |
| 896 | Diethyl ethylphosphonate | 28.68 | 27.50 | 27.44 | 1.24 |
| 897 | Butylcyclopentane | 25.87 | 27.03 | 27.11 | -1.24 |
| 898 | n-Propylformate | 24.53 | 25.48 | 25.77 | -1.24 |
| 899 | 1,3-Dichlorobenzene | 36.01 | 36.22 | 37.25 | -1.24 |
| 900 | 1-Undecyl-3-methylimidazolium bis(trifluoromethanesulfonyl) amide | 32.30 | 33.53 | 33.55 | -1.25 |
| 901 | Pentyl vinyl ether | 23.44 | 22.34 | 22.19 | 1.25 |
| 902 | 1,6-Hexamethylene glycol bis(2-ethylhexanoate) | 30.20 | 29.08 | 28.95 | 1.25 |
| 903 | Dimethyl suberate | 35.65 | 34.42 | 34.40 | 1.25 |
| 904 | Dipropyl methylmalonate | 29.11 | 27.81 | 27.85 | 1.26 |
| 905 | Benzonitrile | 38.79 | 37.49 | 37.53 | 1.26 |
| 906 | Methylcyclohexylether | 28.21 | 29.44 | 29.47 | -1.26 |
| 907 | Methyl valerate | 25.76 | 27.04 | 27.02 | -1.26 |
| 908 | Dioctyl phosphite | 28.97 | 30.19 | 30.23 | -1.26 |
| 909 | Bis(2-methoxyethyl)phosphite | 37.87 | 36.53 | 36.61 | 1.26 |
| 910 | Butyl 2-thiophenecarboxylate | 33.12 | 34.49 | 34.38 | -1.26 |
| 911 | 1,2,3-Tribromopropane | 44.82 | 43.67 | 43.55 | 1.27 |
| 912 | o-Xylene | 29.76 | 28.42 | 28.49 | 1.27 |
| 913 | 4-Fluoronitrobenzene | 38.70 | 39.72 | 39.97 | -1.27 |
| 914 | Tris(2-hexoxyethyl) phosphite | 29.91 | 31.31 | 31.18 | -1.27 |
| 915 | Trihexyl tetradecyl phosphonium bromide | 30.90 | 31.91 | 32.17 | -1.27 |
| 916 | trans-2-Octene | 21.38 | 22.74 | 22.65 | -1.27 |
| 917 | Diethyl thiosulfate | 30.27 | 28.99 |  | 1.28 |
| 918 | Diisobutyl succinate | 28.45 | 27.08 | 27.17 | 1.28 |
| 919 | Ethyl methyl ketone oxime | 29.85 | 28.82 | 28.57 | 1.28 |
| 920 | n-Butylethylether | 20.65 | 21.89 | 21.93 | -1.28 |
| 921 | 1,1-Bis(2-ethoxyethoxy)ethane | 27.44 | 26.37 | 26.15 | 1.29 |
| 922 | Diisopropyl sulfide | 23.18 | 23.96 | 24.47 | -1.29 |
| 923 | 1-Butyl-3-methylpyridinium tetrafluoroborate | 47.50 | 46.39 | 46.21 | 1.29 |
| 924 | 1-Heptene | 20.30 | 21.59 | 21.59 | -1.29 |
| 925 | Di-n-pentyl malonate | 28.30 | 29.54 | 29.59 | -1.29 |
| 926 | 4,5-Dimethyloctane | 22.54 | 21.40 | 21.25 | 1.29 |
| 927 | Methyl octadecanoate | 30.65 | 29.64 | 29.36 | 1.29 |
| 928 | Diisopropyl phosphonate | 26.40 | 27.53 | 27.69 | -1.29 |
| 929 | 1-Chlorotetradecane | 30.36 | 29.21 | 29.06 | 1.30 |
| 930 | 1-Nitrohexane | 29.54 | 30.71 | 30.84 | -1.30 |
| 931 | Di-n-pentyl adipate | 31.25 | 30.14 | 29.95 | 1.30 |
| 932 | Isobutyl phenylpropiolate | 35.05 | 36.26 | 36.35 | -1.30 |
| 933 | Hexyl dihydrogen phosphate | 28.05 | 29.17 | 29.36 | -1.31 |
| 934 | Ethyl caprylate | 26.47 | 25.10 | 25.16 | 1.31 |
| 935 | 2,5-Lutidine | 32.31 | 31.11 | 31.00 | 1.31 |
| 936 | 1-Heptanethiol | 27.26 | 26.15 | 25.95 | 1.31 |
| 937 | Bis(2-ethylhexyl) sebacate | 31.10 | 29.88 | 29.79 | 1.31 |
| 938 | 1-Iodohexadecane | 32.73 | 33.86 | 34.05 | -1.32 |
| 939 | Dibutyl azodicarboxylate | 31.36 | 32.68 |  | -1.32 |
| 940 | 1,5-Dichloropentane | 35.75 | 34.56 | 34.43 | 1.32 |
| 941 | 1-Chlorohexadecane | 30.98 | 29.61 | 29.65 | 1.33 |
| 942 | t-Butylcyclohexane | 26.66 | 25.39 | 25.33 | 1.33 |
| 943 | 1-Decene | 23.54 | 22.28 | 22.21 | 1.33 |
| 944 | 2-Methylcyclohexanone | 32.01 | 30.59 | 30.68 | 1.33 |
| 945 | 2,2,3,3-Tetrafluoro-1-propanol | 27.60 | 26.22 | 26.27 | 1.33 |
| 946 | 1,8-Dibromooctane | 39.84 | 38.42 | 38.51 | 1.33 |
| 947 | N-Butylpyridinium bis(trifluoromethanesulfonyl) amide | 33.40 | 34.65 | 34.73 | -1.33 |
| 948 | Dibutyl succinate | 30.65 | 29.34 | 29.31 | 1.34 |
| 949 | Propyl cyanoacetate | 33.83 | 32.54 | 32.49 | 1.34 |
| 950 | 4-Hexylpyridine | 31.66 | 32.94 | 33.00 | -1.34 |
| 951 | 1-Ethylimidazolium acetate | 37.80 | 39.14 |  | -1.34 |
| 952 | Cyclohexyl formate | 32.22 | 30.69 | 30.88 | 1.34 |
| 953 | n-Heptaldehyde | 26.84 | 25.78 | 25.49 | 1.35 |
| 954 | Tributyl phosphite | 25.84 | 24.62 | 24.49 | 1.35 |
| 955 | Ethyl lactate | 28.90 | 30.14 | 30.25 | -1.35 |
| 956 | Hexyl bromide | 27.88 | 29.24 | 29.23 | -1.35 |
| 957 | Tris(2-ethoxyethyl) phosphite | 30.62 | 28.91 | 29.27 | 1.35 |
| 958 | trans-1,2-Dimethylcyclohexane | 24.04 | 25.46 | 25.39 | -1.35 |
| 959 | Dipropyl ether | 20.50 | 21.89 | 21.85 | -1.35 |
| 960 | Butyl fumarate | 30.71 | 32.04 | 32.06 | -1.35 |
| 961 | Trimethyl hexylammonium bis(trifluoromethylsulfonyl)amide | 35.88 | 36.80 | 37.23 | -1.35 |
| 962 | N-Ethyl-2-methylpyridinium bis(trifluoromethylsulfonyl)amide | 38.45 | 37.09 |  | 1.36 |
| 963 | n-Hexanoic acid | 27.55 | 26.16 | 26.19 | 1.36 |
| 964 | 3-Ethyl-4-methylhexane | 22.34 | 20.96 | 20.98 | 1.36 |
| 965 | 3-Methyl-3-pentanol | 23.71 | 25.03 | 25.07 | -1.36 |
| 966 | 1-Chlorohexane | 26.24 | 27.61 | 27.60 | -1.36 |
| 967 | s-Butylacetate | 22.56 | 23.97 | 23.93 | -1.37 |
| 968 | Glycerol trinitrate | 50.73 | 50.10 | 49.36 | 1.37 |
| 969 | 4,9-Dichloro-4,9-dipropyldodecane | 31.16 | 32.38 | 32.53 | -1.37 |
| 970 | Methyl cyclohexane-1,1-diacetate | 35.30 | 36.60 | 36.67 | -1.37 |
| 971 | Linalool | 26.62 | 27.83 | 27.99 | -1.37 |
| 972 | 1-Butyl-4-methylpyridinium tetrafluoroborate | 45.40 | 46.39 | 46.77 | -1.37 |
| 973 | Chlorocyclohexane | 31.09 | 30.05 | 29.71 | 1.38 |
| 974 | Methyl 3,3-dipropylglutarate | 30.49 | 31.86 | 31.87 | -1.38 |
| 975 | cis-3-Methylcyclohexanol | 29.20 | 30.51 | 30.58 | -1.38 |
| 976 | Dimethyl pimelate | 35.57 | 34.22 | 34.19 | 1.38 |
| 977 | Tetraethoxysilane | 21.67 | 22.43 | 23.06 | -1.39 |
| 978 | 2-Pentylnaphthalene | 34.58 | 35.82 | 35.97 | -1.39 |
| 979 | 1-Dodecanol | 29.41 | 28.03 | 28.02 | 1.39 |
| 980 | Dibenzylamine | 41.10 | 42.25 | 42.49 | -1.39 |
| 981 | 5-Chloro-5-methyldecane | 27.59 | 26.22 | 26.19 | 1.40 |
| 982 | Ethylenedichloride | 32.57 | 33.96 | 33.97 | -1.40 |
| 983 | Allyl propanoate | 26.35 | 25.02 | 24.94 | 1.41 |
| 984 | 3-Ethyl-3-methylhexane | 22.30 | 21.14 | 20.89 | 1.41 |
| 985 | 2-Ethyl-1-butanol | 24.32 | 25.70 | 25.73 | -1.41 |
| 986 | Allyl alcohol | 25.73 | 26.95 | 27.14 | -1.41 |
| 987 | Diethyl sulphide | 25.12 | 26.38 | 26.53 | -1.41 |
| 988 | Pentanoic acid | 27.13 | 25.96 | 25.72 | 1.41 |
| 989 | Butyl nicotinate | 35.22 | 36.58 | 36.63 | -1.41 |
| 990 | Diethyl sulfite | 29.58 | 28.31 | 28.16 | 1.42 |
| 991 | Heptyl 3-ethoxypropanoate | 28.26 | 26.93 | 26.84 | 1.42 |
| 992 | 9-H-Perfluorononyl 2-ethylhexanoate | 23.10 | 21.94 | 21.68 | 1.42 |
| 993 | 1-Nitropentane | 29.31 | 30.51 | 30.73 | -1.42 |
| 994 | Hexyl glycolate | 29.66 | 31.07 | 31.08 | -1.42 |
| 995 | Cyclohexanol | 32.92 | 31.44 | 31.48 | 1.44 |
| 996 | 3-Methylhexane | 19.79 | 21.21 | 21.23 | -1.44 |
| 997 | Tetrachloroethylene | 31.30 | 29.86 |  | 1.44 |
| 998 | 1-Dodecyl-3-methylimidazolium bis(trifluoromethanesulfonyl) amide | 32.30 | 33.73 | 33.74 | -1.44 |
| 999 | Cyclohexyl iodide | 36.25 | 34.80 |  | 1.45 |
| 1000 | Pyrrolidine | 29.23 | 28.01 | 27.78 | 1.45 |
| 1001 | Butyl allylmalonate | 28.98 | 30.39 | 30.43 | -1.45 |
| 1002 | Di-s-butylsulfide | 25.81 | 24.36 |  | 1.45 |
| 1003 | Diethyl azodicarboxylate | 33.33 | 31.88 |  | 1.45 |
| 1004 | 3-(Ethylamino)propionitrile | 32.83 | 31.51 | 31.37 | 1.46 |
| 1005 | Perfluoro-2-methylpentane | 12.12 | 10.76 | 10.66 | 1.46 |
| 1006 | 1,1-Dimethylcyclohexane | 24.13 | 25.64 | 25.59 | -1.46 |
| 1007 | Ethyl salicylate | 38.82 | 37.45 | 37.36 | 1.46 |
| 1008 | 1-Butylpyridinium nitrate | 51.50 | 51.52 | 50.03 | 1.47 |
| 1009 | Hexa(2-ethyl-1-hexoxy)disiloxane | 26.80 | 27.65 | 28.27 | -1.47 |
| 1010 | Ethyl benzoate | 35.04 | 33.49 | 33.56 | 1.48 |
| 1011 | Butanesulfonyl chloride | 35.40 | 34.29 | 33.92 | 1.48 |
| 1012 | 1-Methyl-1-hexylpyrrolidinium bis(trifluoromethanesulfonyl) amide | 31.70 | 32.98 | 33.18 | -1.48 |
| 1013 | Cyclogeraniolane | 23.50 | 24.95 | 24.98 | -1.48 |
| 1014 | 1,3-Diheptylimidazolium bis(trifluoromethylsulfonyl) amide | 29.30 | 30.70 | 30.78 | -1.48 |
| 1015 | Ethyl 3-methyl-1,1-cyclopentanedicarboxylate | 31.12 | 32.53 | 32.60 | -1.48 |
| 1016 | 2,2,3,3-Tetramethylbutane | 20.22 | 18.62 | 18.73 | 1.49 |
| 1017 | Ethyl 2-cyano-3-propylhexanoate | 30.10 | 31.48 | 31.59 | -1.49 |
| 1018 | 1,2-Dimethoxycyclopentane | 31.90 | 33.28 | 33.39 | -1.49 |
| 1019 | 1,1-Diethoxyethane | 21.40 | 22.71 | 22.89 | -1.49 |
| 1020 | Octadecyl perfluorobutyrate | 25.10 | 23.61 | 23.61 | 1.49 |
| 1021 | Piperidine | 29.48 | 28.21 | 27.98 | 1.50 |
| 1022 | 2-Hydroxybicyclopentyl | 36.18 | 34.92 | 34.68 | 1.50 |
| 1023 | Dimethyl sulfate | 38.93 | 37.43 |  | 1.50 |
| 1024 | 1,9-Dichlorononane | 36.51 | 35.36 | 35.01 | 1.50 |
| 1025 | Butyl crotonate | 27.84 | 26.34 | 26.33 | 1.51 |
| 1026 | 1,2,4-Trimethylbenzene | 29.20 | 27.38 | 27.69 | 1.51 |
| 1027 | Di-n-propylmaleate | 31.96 | 30.58 | 30.45 | 1.51 |
| 1028 | 1-Butyl-3-methylimidazolium methosulfate | 43.30 | 41.68 | 41.79 | 1.51 |
| 1029 | Cyclopentanone | 32.80 | 31.32 | 31.29 | 1.51 |
| 1030 | 1-Butylamine | 24.00 | 25.31 | 25.51 | -1.51 |
| 1031 | Acetylacetone | 30.90 | 32.50 | 32.41 | -1.51 |
| 1032 | Methyl cyclopentane-1,1-diacetate | 34.85 | 36.40 | 36.37 | -1.52 |
| 1033 | Propanenitrile | 26.75 | 28.10 | 28.27 | -1.52 |
| 1034 | Ethyl cyclobutane-1,1-dicarboxylate | 31.94 | 33.26 | 33.46 | -1.52 |
| 1035 | Methylenanthate | 25.99 | 27.44 | 27.52 | -1.53 |
| 1036 | N-Butyl-3-methylpyridinium trifluoromethanesulfonate | 38.60 | 37.43 | 37.07 | 1.53 |
| 1037 | Isopentyl propionate | 25.10 | 23.57 | 23.57 | 1.53 |
| 1038 | n-Heptylamine | 24.36 | 25.91 | 25.89 | -1.53 |
| 1039 | 1-Butyl-3-methylimidazolium bis(trifluoromethanesulfonyl) amide | 33.60 | 32.13 | 32.06 | 1.54 |
| 1040 | 1,2-Diethylbenzene | 30.29 | 28.88 | 28.75 | 1.54 |
| 1041 | 1-Ethylimidazolium bis(trifluoromethanesulfonyl) amide | 34.94 | 33.40 |  | 1.54 |
| 1042 | 4,7-Dichloro-4,7-dipropyldecane | 30.31 | 31.98 | 31.85 | -1.54 |
| 1043 | 1-Phenyl-2-butene | 30.48 | 31.79 | 32.02 | -1.54 |
| 1044 | Ethyl nicotinate | 37.80 | 36.18 | 36.25 | 1.55 |
| 1045 | Ethyl formate | 23.84 | 25.28 | 25.39 | -1.55 |
| 1046 | Bis(9-H-perfluorononyl) 3-methylglutarate | 25.00 | 23.75 | 23.45 | 1.55 |
| 1047 | 1,2,3-Trichloropropane | 37.05 | 38.81 | 38.60 | -1.55 |
| 1048 | Cyclopentyl formate | 31.79 | 30.49 | 30.23 | 1.56 |
| 1049 | Cyclopentyl acetate | 30.62 | 29.11 | 29.05 | 1.57 |
| 1050 | 1-Hexyl-3-methylimidazolium dicyanoamide | 43.00 | 44.70 | 44.57 | -1.57 |
| 1051 | 1-Hexanethiol | 27.50 | 25.95 | 25.93 | 1.57 |
| 1052 | 3-(Trifluoromethyl)benzyl perfluorobutyrate | 24.80 | 26.22 | 26.37 | -1.57 |
| 1053 | Isopropylacetate | 22.30 | 23.77 | 23.87 | -1.57 |
| 1054 | Ethyl cyclobutanecarboxylate | 29.86 | 28.31 | 28.28 | 1.58 |
| 1055 | Butyric acid methylester | 25.19 | 26.84 | 26.77 | -1.58 |
| 1056 | Diethyl bromomalonate | 33.08 | 34.59 | 34.66 | -1.58 |
| 1057 | Bicyclopentyl | 32.74 | 31.28 | 31.15 | 1.59 |
| 1058 | 2-Picoline | 33.62 | 32.18 | 32.03 | 1.59 |
| 1059 | 1,3-Dimethylimidazolium bis(trifluoromethylsulfonyl) amide | 36.30 | 34.76 | 34.71 | 1.59 |
| 1060 | 2-Butanone | 24.52 | 26.18 | 26.11 | -1.59 |
| 1061 | 4-Octanol | 25.43 | 26.90 | 27.02 | -1.59 |
| 1062 | 1-Octanethiol | 27.77 | 26.35 | 26.18 | 1.59 |
| 1063 | 1-Phenyl-3-hexanone | 34.83 | 36.37 | 36.42 | -1.59 |
| 1064 | 2-Propylpyridine | 31.36 | 32.58 | 32.95 | -1.59 |
| 1065 | 1-(2-(2-Methoxyethoxy)ethyl)-3-methylimidazolium bis(trifluoromethylsulfonyl)amide | 36.50 | 37.93 | 38.09 | -1.59 |
| 1066 | 1-(2-Pyridinyl)ethanone | 39.65 | 38.50 | 38.05 | 1.60 |
| 1067 | 2,2-Dimethyl-3-ethylpentane | 21.45 | 20.01 | 19.85 | 1.60 |
| 1068 | 1,1-Diisopropoxyethane | 20.97 | 22.45 | 22.57 | -1.60 |
| 1069 | Isobutylbenzene | 27.47 | 29.02 | 29.07 | -1.60 |
| 1070 | Isovaleronitrile | 25.93 | 27.37 | 27.53 | -1.60 |
| 1071 | 2-Tolunitrile | 37.86 | 36.42 | 36.26 | 1.60 |
| 1072 | Bromobenzene | 35.24 | 36.46 | 36.84 | -1.60 |
| 1073 | Cycloheptanol | 33.17 | 31.64 | 31.56 | 1.61 |
| 1074 | 1,1,1-Trichloroethane | 25.18 | 26.60 | 26.79 | -1.61 |
| 1075 | 3,4-Dichlorotoluene | 36.50 | 35.15 | 34.89 | 1.61 |
| 1076 | 2-Iodobutane | 28.21 | 29.46 | 29.82 | -1.61 |
| 1077 | 3-Methyl-4-(2,2,6-trimethyl-2-cyclohexenyl)-2-butanol acetate | 29.47 | 27.85 | 27.86 | 1.61 |
| 1078 | Propyl crotonate | 27.83 | 26.14 | 26.22 | 1.61 |
| 1079 | 1-Phenyl-1-propanone | 37.37 | 35.77 | 35.76 | 1.61 |
| 1080 | Bis(7-H-perfluoroheptyl) pinate | 26.20 | 27.64 | 27.81 | -1.61 |
| 1081 | 2-Ethyltoluene | 30.20 | 28.65 | 28.58 | 1.62 |
| 1082 | Dibutyl suberate | 31.69 | 30.14 | 30.07 | 1.62 |
| 1083 | Octacosane | 29.71 | 31.58 | 31.33 | -1.62 |
| 1084 | 1,9-Diiodononane | 42.51 | 43.86 | 44.13 | -1.62 |
| 1085 | 1-Pentyl-3-methylimidazolium glycine | 41.90 | 43.32 | 43.52 | -1.62 |
| 1086 | Methylchloroacetate | 35.29 | 33.59 | 33.66 | 1.63 |
| 1087 | Xanthogenic acid ethylester | 33.72 | 32.45 | 32.09 | 1.63 |
| 1088 | 2-Dodecanol | 29.16 | 27.70 | 27.53 | 1.63 |
| 1089 | 1,1-Dichloroacetone | 31.91 | 33.67 | 33.54 | -1.63 |
| 1090 | 2-Isobutyrylthiophene | 37.09 | 35.44 | 35.46 | 1.63 |
| 1091 | 3-Ethoxypropanenitrile | 31.52 | 29.93 | 29.89 | 1.63 |
| 1092 | Dimethyl propylmalonate | 31.33 | 32.89 | 32.96 | -1.63 |
| 1093 | N-Ethylpyridinium bis(trifluoromethylsulfonyl)amide | 35.60 | 34.25 | 33.97 | 1.63 |
| 1094 | Triethylamine | 20.72 | 22.29 | 22.35 | -1.63 |
| 1095 | 1-Iodooctane | 30.68 | 32.26 | 32.31 | -1.63 |
| 1096 | Propylcyclopentane | 24.95 | 26.59 | 26.59 | -1.64 |
| 1097 | Ethyl phenylacetate | 35.36 | 33.69 | 33.72 | 1.64 |
| 1098 | 1-Methoxyhexane | 23.21 | 24.83 | 24.86 | -1.65 |
| 1099 | Trihexyl tetradecyl phosphonium chloride | 30.60 | 31.91 | 32.25 | -1.65 |
| 1100 | Dipropyl 1,1-cyclobutanedicarboxylate | 30.67 | 32.20 | 32.32 | -1.65 |
| 1101 | Butyl dihydrogen phosphate | 27.38 | 28.77 | 29.03 | -1.65 |
| 1102 | Hexa(2-ethyl-1-butoxy)disiloxane | 26.10 | 25.25 | 24.44 | 1.66 |
| 1103 | Heptyl dihydrogen phosphate | 28.04 | 29.37 | 29.70 | -1.66 |
| 1104 | Octamethyltrisiloxane | 17.56 | 16.39 | 15.90 | 1.66 |
| 1105 | 1-Heptylnaphthalene | 34.59 | 36.28 | 36.25 | -1.66 |
| 1106 | 2,3,3-Trimethylhexane | 21.50 | 20.01 | 19.84 | 1.66 |
| 1107 | Ethyl cyclopentane-1,1-diacetate | 32.41 | 33.86 | 34.07 | -1.66 |
| 1108 | Ethyl 2-naphthaleneacetate | 40.67 | 39.01 | 39.01 | 1.66 |
| 1109 | Butyl 2-naphthaleneacetate | 37.75 | 39.41 | 39.41 | -1.66 |
| 1110 | Propyl decanoate | 27.41 | 25.70 | 25.74 | 1.67 |
| 1111 | 2-Ethoxycyclohexanol | 34.70 | 32.94 | 33.03 | 1.67 |
| 1112 | Pentyloxybenzene | 31.72 | 33.42 | 33.39 | -1.67 |
| 1113 | Pentyl fumarate | 30.69 | 32.24 | 32.37 | -1.68 |
| 1114 | Dipropyl oxalate | 30.19 | 28.54 | 28.51 | 1.68 |
| 1115 | Methyl 3-methylbutyrate | 24.24 | 25.91 | 25.92 | -1.68 |
| 1116 | Isopentyl hydrocinnamate | 31.75 | 33.36 | 33.44 | -1.69 |
| 1117 | 4-(1-Ethylpropyl)pyridine | 33.22 | 31.61 | 31.53 | 1.69 |
| 1118 | 1,3-Dibutylimidazolium bis(trifluoromethylsulfonyl) amide | 31.10 | 29.50 | 29.40 | 1.70 |
| 1119 | Dibutyl adipate | 31.37 | 29.74 | 29.67 | 1.70 |
| 1120 | 3-Ethylpyridine | 33.77 | 32.14 | 32.07 | 1.70 |
| 1121 | 2-Methyl-2-pentanol | 23.35 | 25.03 | 25.05 | -1.70 |
| 1122 | Tetraethylmethane | 22.83 | 21.14 | 21.13 | 1.70 |
| 1123 | Isopentyl fumarate | 29.33 | 31.11 | 31.03 | -1.70 |
| 1124 | 3-Hexylpyridine | 31.11 | 32.94 | 32.81 | -1.70 |
| 1125 | 1-Chlorooctadecane | 31.51 | 30.01 | 29.80 | 1.71 |
| 1126 | Bis(1,H,1H-heptafluorobutyl) adipate | 20.40 | 21.96 | 22.11 | -1.71 |
| 1127 | Ethyl campholanate | 27.64 | 26.10 | 25.93 | 1.71 |
| 1128 | 1-Methyl-4-isopropylcyclohexene | 27.16 | 25.52 | 25.45 | 1.71 |
| 1129 | 1-Phenyl-1-propanol | 34.00 | 35.69 | 35.71 | -1.71 |
| 1130 | Styrene | 32.00 | 30.41 | 30.29 | 1.71 |
| 1131 | Crotonaldehyde | 25.66 | 26.82 | 27.37 | -1.71 |
| 1132 | 4-Ethylpyridine | 33.72 | 32.14 | 32.01 | 1.71 |
| 1133 | Propargyl propionate | 31.25 | 29.66 | 29.53 | 1.72 |
| 1134 | Allyl acetate | 26.36 | 24.82 | 24.64 | 1.72 |
| 1135 | (Ethylthio)benzene | 37.04 | 35.43 | 35.32 | 1.72 |
| 1136 | 1-Nonyne | 25.01 | 26.69 | 26.73 | -1.72 |
| 1137 | Perfluoro(propylcyclohexane) | 17.20 | 18.77 | 18.92 | -1.72 |
| 1138 | Tripenyl phosphite | 26.92 | 25.22 | 25.19 | 1.73 |
| 1139 | Isopentyl alcohol | 23.71 | 25.50 | 25.44 | -1.73 |
| 1140 | Cyclopentanol | 33.02 | 31.24 | 31.28 | 1.74 |
| 1141 | 3-Pentanol | 24.60 | 26.30 | 26.34 | -1.74 |
| 1142 | 3-Heptyloxypropanenitrile | 29.38 | 30.93 | 31.12 | -1.74 |
| 1143 | 2-Chloronitrobenzene | 45.77 | 44.03 | 44.02 | 1.75 |
| 1144 | 1-Butyl-1-methylpiperidinium bis(trifluoromethylsulfonyl)amide | 34.20 | 32.78 | 32.45 | 1.75 |
| 1145 | 1-Fluoroheptane | 22.82 | 21.43 | 21.07 | 1.75 |
| 1146 | Isopentyl crotonate | 27.25 | 25.41 | 25.50 | 1.75 |
| 1147 | Dipropyl succinate | 30.68 | 28.94 | 28.93 | 1.75 |
| 1148 | Butylcellosolve | 26.55 | 28.26 | 28.30 | -1.75 |
| 1149 | 1-Ethyl-3-methylimidazolium pentyltrifluoroborate | 33.80 | 35.55 |  | -1.75 |
| 1150 | Pentyl crotonate | 28.27 | 26.54 | 26.51 | 1.76 |
| 1151 | Butyl butylxanthate | 31.89 | 33.25 | 33.65 | -1.76 |
| 1152 | Enanthic acid | 28.15 | 26.36 | 26.39 | 1.76 |
| 1153 | Methylenecyclopentane | 24.35 | 25.94 | 26.11 | -1.76 |
| 1154 | Hemimellitene | 28.83 | 27.38 | 27.07 | 1.76 |
| 1155 | 1-Iodoheptane | 30.38 | 32.06 | 32.14 | -1.76 |
| 1156 | 1,3-Dioctylimidazolium bis(trifluoromethylsulfonyl) amide | 29.20 | 31.10 | 30.96 | -1.76 |
| 1157 | N-Propyl-3-methylpyridinium bis(trifluoromethylsulfonyl)amide | 34.70 | 33.38 | 32.94 | 1.76 |
| 1158 | Acetic acid | 27.10 | 25.36 | 25.33 | 1.77 |
| 1159 | Isohexanoic acid | 26.60 | 25.03 | 24.83 | 1.77 |
| 1160 | 1,4-Bis(hexanoyloxy)-2-butyne | 31.50 | 33.24 | 33.27 | -1.77 |
| 1161 | 2,4-Lutidine | 33.17 | 31.11 | 31.39 | 1.78 |
| 1162 | Oxirane | 24.33 | 26.03 | 26.11 | -1.78 |
| 1163 | Butyl decanoate | 27.66 | 25.90 | 25.88 | 1.78 |
| 1164 | 4-Heptanone oxime | 27.93 | 29.42 | 29.72 | -1.79 |
| 1165 | Dioctyl sulfide | 30.25 | 28.78 | 28.46 | 1.79 |
| 1166 | Cyanoethylene | 27.30 | 28.82 | 29.09 | -1.79 |
| 1167 | Trihexyl phosphite | 27.54 | 25.82 | 25.75 | 1.79 |
| 1168 | Isopentyl bromide | 26.11 | 27.91 | 27.91 | -1.80 |
| 1169 | 2-Butylpyridine | 31.02 | 32.78 | 32.83 | -1.81 |
| 1170 | Methyl isobutyl ketone | 23.64 | 25.45 | 25.45 | -1.81 |
| 1171 | Perfluoro-n-octane | 13.70 | 11.90 | 11.89 | 1.81 |
| 1172 | 2-Propoxycyclohexanol | 34.70 | 33.14 | 32.89 | 1.81 |
| 1173 | trans-3-Methylcyclohexanol | 28.80 | 30.51 | 30.61 | -1.81 |
| 1174 | 2,4-Dimethylpentane | 18.15 | 20.08 | 19.96 | -1.81 |
| 1175 | cis-2-Heptene | 20.81 | 22.51 | 22.62 | -1.81 |
| 1176 | trans-2-Hexahydroindanone | 33.03 | 34.80 | 34.84 | -1.81 |
| 1177 | 2-Hexanol | 24.71 | 26.50 | 26.53 | -1.82 |
| 1178 | 1-Pentanesulfonylchloride | 33.10 | 34.49 | 34.92 | -1.82 |
| 1179 | Diisopropylamine | 19.68 | 20.89 | 21.52 | -1.84 |
| 1180 | Bis(2-pentoxyethyl)phosphite | 30.94 | 32.65 | 32.78 | -1.84 |
| 1181 | 2-Iodopropane | 27.42 | 29.26 |  | -1.84 |
| 1182 | 2,3-Butyleneglycol | 34.06 | 32.14 | 32.21 | 1.85 |
| 1183 | Butyl 1-naphthylketone | 39.31 | 41.49 | 41.16 | -1.85 |
| 1184 | 1-Propyl-3-methylimidazolium tetrafluoroborate | 47.00 | 44.74 | 45.14 | 1.86 |
| 1185 | Ethylnitrate | 28.12 | 29.85 | 29.98 | -1.86 |
| 1186 | Cyclohexylamine | 31.22 | 29.36 | 29.36 | 1.86 |
| 1187 | Heptyl glycolate | 29.40 | 31.27 | 31.26 | -1.86 |
| 1188 | 1-Butyl-1-methylpyrrolidinium thiocyanate | 49.80 | 48.41 | 47.94 | 1.86 |
| 1189 | Fluorobenzene | 27.26 | 28.96 | 29.13 | -1.87 |
| 1190 | 3,4-Dimethylisoxazole | 35.76 | 34.79 | 33.88 | 1.88 |
| 1191 | n-Butyldichloroacetate | 30.49 | 31.99 | 32.37 | -1.88 |
| 1192 | N-Nitrosodipentylamine | 30.24 | 31.83 | 32.12 | -1.88 |
| 1193 | Ethyl decanoate | 27.23 | 25.50 | 25.35 | 1.88 |
| 1194 | n-Octylamine | 27.73 | 26.11 | 25.85 | 1.88 |
| 1195 | Trimethyl phosphate | 37.48 | 35.83 | 35.60 | 1.88 |
| 1196 | Diethyl ethylmalonate | 29.51 | 27.61 | 27.63 | 1.88 |
| 1197 | 2-Methylheptane | 19.79 | 21.65 | 21.67 | -1.88 |
| 1198 | 1-Ethyl-3-methylimidazolium thiocyanate | 49.00 | 47.56 | 47.12 | 1.88 |
| 1199 | 1-Butyl-3-methylimidazolium dicyanoamide | 45.81 | 44.30 | 43.92 | 1.89 |
| 1200 | Perfluorodibutyl ether | 13.40 | 14.75 | 15.29 | -1.89 |
| 1201 | 1-Ethyl-2-methoxycyclohexanol | 36.10 | 34.41 | 34.20 | 1.90 |
| 1202 | 4-Isopropylbenzaldehyde | 34.03 | 32.57 | 32.13 | 1.90 |
| 1203 | Methyl 4-methyl-1,1-cyclohexanedicarboxylate | 33.29 | 35.27 | 35.19 | -1.90 |
| 1204 | Ethyl 4-methylcyclohexane-1,1-diacetate | 31.30 | 33.13 | 33.20 | -1.90 |
| 1205 | 1-Methyl-1-propylpiperidinium bis(trifluoromethylsulfonyl)amide | 34.50 | 32.58 | 32.59 | 1.91 |
| 1206 | 1,6-Hexanediol bis(perfluorooctanoate) | 20.60 | 18.84 | 18.69 | 1.91 |
| 1207 | Bis(perfluorooctyl) 3-methylglutarate | 19.50 | 17.95 | 17.59 | 1.91 |
| 1208 | N-Butylaniline | 33.91 | 35.42 | 35.82 | -1.91 |
| 1209 | 2-Methylpropylamine | 22.30 | 24.18 | 24.21 | -1.91 |
| 1210 | Ethyl 3-methylcyclohexane-1,1-diacetate | 31.26 | 33.13 | 33.17 | -1.91 |
| 1211 | N-Butyl-4-methylpyridinium bis(trifluoromethylsulfonyl)amide | 35.40 | 33.58 | 33.48 | 1.92 |
| 1212 | 6-Chlorododecane | 27.94 | 26.31 | 26.02 | 1.92 |
| 1213 | 1-Pentyl-3-methylimidazolium lactate | 42.40 | 44.31 | 44.33 | -1.93 |
| 1214 | 2-Methylhexane | 19.29 | 21.21 | 21.22 | -1.93 |
| 1215 | Dimethyl cyclobutane-1,1-dicarboxylate | 35.04 | 36.88 | 36.97 | -1.93 |
| 1216 | Butyl 1-naphthaleneacetate | 37.61 | 39.41 | 39.54 | -1.93 |
| 1217 | Ethyl-n-propylether | 19.80 | 21.69 | 21.73 | -1.93 |
| 1218 | 4-(1-Hexylheptyl)pyridine | 31.27 | 33.21 | 33.20 | -1.93 |
| 1219 | Ethyl 3-ethoxypropanoate | 27.84 | 25.93 | 25.90 | 1.94 |
| 1220 | Ethyl thiocyanate | 34.83 | 33.31 | 32.89 | 1.94 |
| 1221 | Bromocyclopentane | 33.31 | 31.45 | 31.36 | 1.95 |
| 1222 | Triheptyl phosphite | 28.15 | 26.42 | 26.20 | 1.95 |
| 1223 | Bis(2-hexoxyethyl)phosphite | 31.18 | 33.05 | 33.13 | -1.95 |
| 1224 | Methyl isobutanoate | 23.73 | 25.71 | 25.69 | -1.96 |
| 1225 | 5-Chlorododecane | 28.08 | 26.31 | 26.11 | 1.97 |
| 1226 | 3-Methyl-2-butanol | 23.20 | 25.17 | 25.17 | -1.97 |
| 1227 | Hexyl perfluorobutyrate | 19.20 | 21.21 | 21.17 | -1.97 |
| 1228 | Methyl trioctylammonium bis(trifluoromethylsulfonyl)amide | 29.06 | 30.84 | 31.04 | -1.98 |
| 1229 | 2,4-Dimethyl-3-ethylpentane | 21.87 | 19.83 | 19.89 | 1.98 |
| 1230 | 3-Fluorotoluene | 29.80 | 27.89 | 27.81 | 1.99 |
| 1231 | 2-Pentylpyridine | 30.98 | 32.98 | 32.97 | -1.99 |
| 1232 | Methyl hexanoate | 25.33 | 27.24 | 27.32 | -1.99 |
| 1233 | 4-Chlorododecane | 28.01 | 26.31 | 26.02 | 1.99 |
| 1234 | Ethyl acetoacetate | 32.40 | 30.42 | 30.40 | 2.00 |
| 1235 | Dibutylsulfate | 31.15 | 33.15 |  | -2.00 |
| 1236 | Methyl 3-methyl-1,1-cyclohexanedicarboxylate | 33.36 | 35.27 | 35.36 | -2.00 |
| 1237 | 2,2-Dimethylpentane | 18.03 | 20.26 | 20.03 | -2.00 |
| 1238 | Butyl isonicotinate | 34.77 | 36.58 | 36.77 | -2.00 |
| 1239 | 1,5-Cyclooctadiene | 31.46 | 29.32 | 29.45 | 2.01 |
| 1240 | Isobutyl fumarate | 28.93 | 30.91 | 30.94 | -2.01 |
| 1241 | 1-Iodohexane | 29.93 | 31.86 | 31.94 | -2.01 |
| 1242 | s-Butyl nicotinate | 34.42 | 36.25 | 36.44 | -2.02 |
| 1243 | 1,1-Dipentyloxyethane | 25.67 | 23.91 | 23.65 | 2.02 |
| 1244 | 2-Hexylnaphthalene | 33.95 | 36.05 | 35.97 | -2.02 |
| 1245 | Dipentyl disulfide | 29.61 | 31.34 | 31.63 | -2.02 |
| 1246 | Diethyl acetylenedicarboxylate | 33.31 | 31.64 | 31.29 | 2.02 |
| 1247 | 3-Hexanol | 24.51 | 26.50 | 26.53 | -2.02 |
| 1248 | Diisopentylamine | 23.81 | 22.01 | 21.78 | 2.03 |
| 1249 | Bis(2-chloroethyl) ether | 37.96 | 35.79 | 35.93 | 2.03 |
| 1250 | 2-Propanethiol | 21.91 | 23.94 |  | -2.03 |
| 1251 | Dimethyl adipate | 35.86 | 34.02 | 33.83 | 2.03 |
| 1252 | 1-Iodopropane | 29.28 | 31.26 | 31.31 | -2.03 |
| 1253 | Ethyl 2-O-benzoyllactate | 35.61 | 37.60 | 37.65 | -2.04 |
| 1254 | 2-(Bromomethyl)tetrahydrofuran | 37.11 | 35.08 | 35.07 | 2.04 |
| 1255 | Heptane | 20.28 | 22.34 | 22.32 | -2.04 |
| 1256 | 1-Allylglycerol | 33.30 | 35.02 | 35.34 | -2.04 |
| 1257 | 3-Fluoronitrobenzene | 37.88 | 39.72 | 39.93 | -2.05 |
| 1258 | 2,3,4-Trimethylhexane | 21.87 | 19.83 | 19.80 | 2.07 |
| 1259 | Perfluoro-1,2-dimethylcyclohexane | 15.50 | 17.24 | 17.57 | -2.07 |
| 1260 | Triethyl phosphate | 29.95 | 28.21 | 27.88 | 2.07 |
| 1261 | Butanoic anhydride | 28.44 | 29.84 | 30.52 | -2.08 |
| 1262 | 1-Iodopentane | 29.38 | 31.66 | 31.46 | -2.08 |
| 1263 | N-Ethylaniline | 36.86 | 35.02 | 34.77 | 2.09 |
| 1264 | Dipropyl suberate | 31.87 | 29.74 | 29.78 | 2.09 |
| 1265 | 4-(2,2,6-Trimethylcyclohexyl)-2-butanol | 30.57 | 28.50 | 28.48 | 2.09 |
| 1266 | 2-Methyl-2-butanol | 22.68 | 24.83 | 24.77 | -2.09 |
| 1267 | Methyl 3-methylglutarate | 33.70 | 31.81 | 31.61 | 2.09 |
| 1268 | 1-Propyl-3-methylimidazolium tris(pentafluoroethyl)trifluorophosphate | 34.10 | 32.23 | 32.01 | 2.09 |
| 1269 | 2-Ethylnaphthalene | 37.10 | 35.13 | 35.00 | 2.10 |
| 1270 | n-Amyl ether | 24.80 | 22.69 | 22.70 | 2.10 |
| 1271 | 3-Heptylpyridine | 31.25 | 33.14 | 33.35 | -2.10 |
| 1272 | 2-Nitrotoluene | 41.46 | 40.01 | 39.35 | 2.11 |
| 1273 | 1-Ethyl-3-methylimidazolium tricyanomethide | 47.90 | 45.77 |  | 2.13 |
| 1274 | Methyl phenylacetate | 38.32 | 36.23 | 36.19 | 2.13 |
| 1275 | 3,3'-Bitolyl | 39.00 | 37.12 | 36.87 | 2.13 |
| 1276 | 1,3-Dinonylimidazolium bis(trifluoromethylsulfonyl) amide | 29.50 | 31.50 | 31.64 | -2.14 |
| 1277 | Butoxybenzene | 31.45 | 33.22 | 33.59 | -2.14 |
| 1278 | Methyl cis-cinnamate | 40.17 | 38.07 | 38.02 | 2.15 |
| 1279 | 1,7-Dibromoheptane | 40.28 | 38.22 | 38.13 | 2.15 |
| 1280 | Diamylamine | 26.15 | 24.27 | 24.00 | 2.15 |
| 1281 | Bis(cyclohexyl)amine | 33.74 | 31.97 | 31.59 | 2.15 |
| 1282 | Isopentyliodide | 28.54 | 30.53 | 30.69 | -2.15 |
| 1283 | 3-Methylthiophene | 32.33 | 30.82 | 30.17 | 2.16 |
| 1284 | 11-Decyldocosane | 30.20 | 32.21 | 32.36 | -2.16 |
| 1285 | Ethyl 1-naphthaleneacetate | 41.09 | 39.01 | 38.92 | 2.17 |
| 1286 | Carvone | 34.70 | 32.83 | 32.53 | 2.17 |
| 1287 | Dimethyl decyl isopropylammonium bis(trifluoromethylsulfonyl)amide | 31.30 | 33.19 | 33.47 | -2.17 |
| 1288 | 2-Hexanoylthiophene | 34.83 | 36.97 | 37.00 | -2.17 |
| 1289 | 3-Methylcyclopentanol | 28.24 | 30.31 | 30.41 | -2.17 |
| 1290 | 2-Methoxycyclohexanol | 37.70 | 35.48 | 35.52 | 2.18 |
| 1291 | Diethyl benzylmalonate | 35.04 | 37.20 | 37.22 | -2.18 |
| 1292 | Isobutyronitrile | 24.93 | 27.17 | 27.11 | -2.18 |
| 1293 | Trioctyl borate | 28.18 | 26.44 | 26.00 | 2.18 |
| 1294 | Cyclohexyl acetate | 31.27 | 29.31 | 29.09 | 2.18 |
| 1295 | 3-Chloro-3-methylheptane | 23.53 | 25.62 | 25.71 | -2.18 |
| 1296 | Pelargonic acid | 28.90 | 26.76 | 26.72 | 2.18 |
| 1297 | Dipropyl sebacate | 32.38 | 30.14 | 30.19 | 2.19 |
| 1298 | 1-Pentyl-3-methylimidazolium L-alanine | 44.40 | 42.23 | 42.21 | 2.19 |
| 1299 | Tetraethyleneglycol hexyl ether | 32.10 | 34.15 | 34.29 | -2.19 |
| 1300 | Hexyleneglycol | 33.10 | 31.07 | 30.91 | 2.19 |
| 1301 | Iodocyclopentane | 36.19 | 34.60 | 34.00 | 2.19 |
| 1302 | Trimethyl butylammonium bis(trifluoromethylsulfonyl)amide | 38.05 | 36.40 | 35.86 | 2.19 |
| 1303 | Pentyl 2-thiophenecarboxylate | 32.52 | 34.69 | 34.71 | -2.19 |
| 1304 | Diethyl O-butyrylmalate | 30.77 | 32.85 | 32.97 | -2.20 |
| 1305 | Methyl dipropylmalonate | 29.34 | 31.46 | 31.54 | -2.20 |
| 1306 | Methyl 2-naphthaleneacetate | 43.85 | 41.55 | 41.65 | 2.20 |
| 1307 | 2-Ethoxycyclopentanol | 35.00 | 32.74 | 32.80 | 2.20 |
| 1308 | Methyl citraconate | 36.34 | 34.02 | 34.13 | 2.21 |
| 1309 | alpha-Ethyl-beta-methylstyrene | 33.87 | 31.66 | 31.66 | 2.21 |
| 1310 | 2-Bromopropane | 23.84 | 26.11 | 26.05 | -2.21 |
| 1311 | Cyclooctane | 29.84 | 27.72 | 27.63 | 2.21 |
| 1312 | 2-Methoxy-1-methylcyclohexanol | 36.40 | 34.21 | 34.17 | 2.23 |
| 1313 | Diisopentyl adipate | 30.10 | 27.88 | 27.87 | 2.23 |
| 1314 | Isopropylphenylether | 30.81 | 32.69 | 33.04 | -2.23 |
| 1315 | 4-Methyl-2-pentanol | 23.03 | 25.37 | 25.26 | -2.23 |
| 1316 | 2-Pentanol | 23.95 | 26.30 | 26.19 | -2.24 |
| 1317 | Ethyl 3-methylcyclopentane-1,1-diacetate | 30.68 | 32.93 | 32.92 | -2.24 |
| 1318 | Bromocyclohexane | 33.90 | 31.65 | 31.65 | 2.25 |
| 1319 | 2,3-Lutidine | 33.24 | 31.11 | 30.99 | 2.25 |
| 1320 | o-Cresol | 35.39 | 33.21 | 33.14 | 2.25 |
| 1321 | Diisopropyl sulfite | 26.14 | 28.05 | 28.39 | -2.25 |
| 1322 | beta-Ethyl-alpha-propylstyrene | 34.20 | 32.12 | 31.94 | 2.26 |
| 1323 | 3-(Dibutylamino)propionitrile | 29.19 | 31.53 | 31.45 | -2.26 |
| 1324 | Butylnitrate | 28.10 | 30.25 | 30.36 | -2.26 |
| 1325 | N,N-Dimethylaniline | 36.04 | 38.07 | 38.30 | -2.26 |
| 1326 | 1-Undecene | 24.86 | 22.51 | 22.59 | 2.27 |
| 1327 | Ethyl ethanesulfonate | 36.04 | 38.31 |  | -2.27 |
| 1328 | Isobutyl ricinoleate | 31.54 | 34.05 | 33.81 | -2.27 |
| 1329 | Pentyl phenyl sulfide | 34.16 | 36.03 | 36.44 | -2.28 |
| 1330 | 1-Butyl-3-methylimidazolium hydrosulfate | 43.60 | 45.88 |  | -2.28 |
| 1331 | Lactonitrile | 36.39 | 34.14 | 34.10 | 2.29 |
| 1332 | 1-Tetradecyl-1,8-diazabicyclo(5,4,0)undec-7-enium dicyanamide | 30.25 | 32.04 | 32.54 | -2.29 |
| 1333 | 1-Bromopentane | 26.80 | 29.04 | 29.09 | -2.29 |
| 1334 | Hexyl nitrite | 23.86 | 26.15 |  | -2.29 |
| 1335 | Phenylacetone | 38.00 | 35.77 | 35.70 | 2.30 |
| 1336 | Methyl isonicotinate | 40.83 | 38.72 | 38.53 | 2.30 |
| 1337 | Ethylcyclopentane | 23.88 | 26.15 | 26.18 | -2.30 |
| 1338 | Bis(2-hydroxyethyl)methylamine | 40.15 | 38.06 | 37.84 | 2.31 |
| 1339 | 1-Methyl-1-decylpyrrolidinium bis(trifluoromethanesulfonyl) amide | 31.40 | 33.78 | 33.71 | -2.31 |
| 1340 | Cyclohexane | 24.65 | 26.84 | 26.96 | -2.31 |
| 1341 | 2,3-Dimethylbutane | 17.38 | 19.64 | 19.69 | -2.31 |
| 1342 | Mustard gas | 42.82 | 40.68 | 40.51 | 2.31 |
| 1343 | Isopropyl nicotinate | 33.82 | 36.05 | 36.13 | -2.31 |
| 1344 | Tri-n-pentylamine | 26.24 | 24.09 | 23.92 | 2.32 |
| 1345 | N-Nitrosodimethylamine | 38.36 | 36.69 | 36.04 | 2.32 |
| 1346 | 1,1-Di-p-tolylethane | 34.50 | 36.45 | 36.83 | -2.33 |
| 1347 | 1-Undecanol | 25.46 | 27.83 | 27.79 | -2.33 |
| 1348 | Methylcyclopentadecane | 32.33 | 30.11 | 29.99 | 2.34 |
| 1349 | 2-Hydroxyacetophenone | 41.94 | 39.53 | 39.60 | 2.34 |
| 1350 | Pentyl 2-naphthoate | 37.20 | 39.41 | 39.54 | -2.34 |
| 1351 | Diisopentyl sebacate | 31.11 | 28.68 | 28.77 | 2.34 |
| 1352 | trans-(1-Methyl-1-propenyl)benzene | 33.61 | 31.43 | 31.27 | 2.34 |
| 1353 | Ethyl trans-cinnamate | 37.90 | 35.53 | 35.55 | 2.35 |
| 1354 | 1-Methoxynaphthalene | 42.84 | 40.68 | 40.49 | 2.35 |
| 1355 | Allyl bromide | 26.94 | 29.36 | 29.29 | -2.35 |
| 1356 | Methyl acetate | 24.08 | 26.44 | 26.43 | -2.35 |
| 1357 | Isobutyl iodide | 27.97 | 30.33 | 30.32 | -2.35 |
| 1358 | Benzene | 28.22 | 30.50 | 30.57 | -2.35 |
| 1359 | Dimethyl glutarate | 36.21 | 33.82 | 33.86 | 2.35 |
| 1360 | Di-s-butylamine | 22.70 | 21.29 | 20.34 | 2.36 |
| 1361 | Hexyl 2-thiophenecarboxylate | 32.55 | 34.89 | 34.91 | -2.36 |
| 1362 | 1-Butyl-3-methylimidazolium tetracyanoborate | 44.40 | 42.50 | 42.03 | 2.37 |
| 1363 | Ethyl 3-phenylpropiolate | 39.18 | 36.99 | 36.80 | 2.38 |
| 1364 | Methyl 3-methyl-1,1-cyclopentanedicarboxylate | 32.56 | 35.07 | 34.94 | -2.38 |
| 1365 | 1-Naphthoic acid ethylester | 41.37 | 38.81 | 38.99 | 2.38 |
| 1366 | Methylcyclohexane | 23.85 | 26.15 | 26.23 | -2.38 |
| 1367 | 2-Chloro-2-methylpentane | 22.93 | 25.22 | 25.31 | -2.38 |
| 1368 | 1-Decyl-1,8-diazabicyclo(5,4,0)undec-7-enium thiocyanate | 32.94 | 34.90 | 35.33 | -2.39 |
| 1369 | alpha-Methylstyrene | 32.56 | 30.28 | 30.17 | 2.39 |
| 1370 | Dimethyl carbonate | 29.25 | 31.36 | 31.64 | -2.39 |
| 1371 | 1-Dodecene | 25.15 | 22.74 | 22.75 | 2.40 |
| 1372 | 2,2,3,4-Tetramethylpentane | 21.12 | 18.88 | 18.72 | 2.40 |
| 1373 | Pentyl 1-naphthoate | 37.20 | 39.41 | 39.60 | -2.40 |
| 1374 | 1,3-Dimethylimidazolium dimethylphosphate | 46.98 | 44.97 | 44.58 | 2.40 |
| 1375 | 2,2,4,6,6-Pentamethylheptane | 21.40 | 19.25 | 18.99 | 2.41 |
| 1376 | trans-1,4-Dimethylcyclohexane | 23.02 | 25.46 | 25.43 | -2.41 |
| 1377 | 2-Ethoxyethyl dihydrogen phosphate | 32.20 | 30.20 | 29.79 | 2.41 |
| 1378 | 3-Iodonitrobenzene | 47.40 | 49.81 |  | -2.41 |
| 1379 | Nonyl heptanoate | 28.63 | 26.30 | 26.21 | 2.42 |
| 1380 | 1,4-Di-s-butylbenzene | 29.98 | 27.54 | 27.55 | 2.43 |
| 1381 | Dibutyl 1,1-cyclobutanedicarboxylate | 30.28 | 32.60 | 32.71 | -2.43 |
| 1382 | 1,3-Didecylimidazolium bis(trifluoromethylsulfonyl) amide | 29.60 | 31.90 | 32.03 | -2.43 |
| 1383 | 1,3-Diethylimidazolium diethylphosphate | 35.50 | 33.83 | 33.06 | 2.44 |
| 1384 | Diethyl maleate | 32.59 | 30.18 | 30.15 | 2.44 |
| 1385 | alpha-Pinene | 26.10 | 28.38 | 28.54 | -2.44 |
| 1386 | Ethyl dodecanoate | 28.32 | 25.90 | 25.88 | 2.44 |
| 1387 | 2-Methyl-1-propanol | 22.98 | 25.30 | 25.42 | -2.44 |
| 1388 | Pentyl nicotinate | 34.23 | 36.78 | 36.67 | -2.44 |
| 1389 | Benzyl ether | 38.20 | 40.67 | 40.65 | -2.45 |
| 1390 | Triisobutylamine | 22.30 | 20.10 | 19.85 | 2.45 |
| 1391 | Butyl dodecanoate | 28.73 | 26.30 | 26.28 | 2.45 |
| 1392 | Tridecyl borate | 29.38 | 27.64 | 26.93 | 2.45 |
| 1393 | 1-Chloropentane | 24.94 | 27.41 | 27.39 | -2.45 |
| 1394 | 3,3,4-Trimethylhexane | 22.31 | 20.01 | 19.85 | 2.46 |
| 1395 | 3-Butenoic acid | 28.82 | 26.48 | 26.36 | 2.46 |
| 1396 | 2-Heptylnaphthalene | 33.85 | 36.28 | 36.31 | -2.46 |
| 1397 | 4-Benzyl-2-chlorophenol | 44.20 | 45.95 | 46.66 | -2.46 |
| 1398 | Dimethylamine | 26.79 | 29.13 | 29.26 | -2.47 |
| 1399 | 1-Butyl-3-ethylimidazolium diethylphosphate | 32.20 | 34.23 | 34.67 | -2.47 |
| 1400 | Muscone | 34.59 | 32.39 | 32.12 | 2.47 |
| 1401 | Nitroethane | 32.13 | 29.91 | 29.65 | 2.48 |
| 1402 | Diethyleneglycol diethyl ether | 27.39 | 25.15 | 24.91 | 2.48 |
| 1403 | 3-(Dipropylamino)propionitrile | 28.99 | 31.13 | 31.47 | -2.48 |
| 1404 | Thioanisole | 40.33 | 37.68 | 37.84 | 2.49 |
| 1405 | 1-Octylnaphthalene | 34.23 | 36.51 | 36.72 | -2.49 |
| 1406 | Dipropyl adipate | 31.83 | 29.34 | 29.33 | 2.50 |
| 1407 | Heptyl nonanoate | 28.57 | 26.30 | 26.07 | 2.50 |
| 1408 | Hexyl decanoate | 28.75 | 26.30 | 26.25 | 2.50 |
| 1409 | Bis(2-heptoxyethyl)phosphite | 30.95 | 33.45 | 33.45 | -2.50 |
| 1410 | Tetraethylene glycol octyl ether | 32.00 | 34.55 | 34.51 | -2.51 |
| 1411 | Dicumenylmethane | 33.50 | 36.01 | 36.01 | -2.51 |
| 1412 | Pentyl dihydrogen phosphate | 26.87 | 28.97 | 29.38 | -2.51 |
| 1413 | Tributylmethylammonium bis(trifluoromethylsulfonyl)amide | 30.60 | 28.44 | 28.09 | 2.51 |
| 1414 | 1-Butyl-4-methylpyridinium thiocyanate | 47.70 | 49.41 | 50.21 | -2.51 |
| 1415 | 2-Hexylpyridine | 30.62 | 33.18 | 33.13 | -2.51 |
| 1416 | Triacontane | 30.19 | 32.46 | 32.71 | -2.52 |
| 1417 | trans-2-Heptene | 20.10 | 22.51 | 22.62 | -2.52 |
| 1418 | Trihexyl tetradecyl phosphonium dicyanamide | 34.85 | 33.13 | 32.33 | 2.52 |
| 1419 | trans-1-Propenylbenzene | 34.12 | 31.56 | 31.59 | 2.53 |
| 1420 | 2-Chlorododecane | 28.62 | 26.31 | 26.09 | 2.53 |
| 1421 | 1-Propanol | 23.71 | 26.23 | 26.25 | -2.54 |
| 1422 | 3-Chlorododecane | 28.58 | 26.31 | 26.04 | 2.54 |
| 1423 | Pentyl undecanoate | 28.62 | 26.30 | 26.07 | 2.55 |
| 1424 | Ethyl 2-cyano-3,3-dipropylacrylate | 32.43 | 34.66 | 34.98 | -2.55 |
| 1425 | Diisopentyl succinate | 29.92 | 27.48 | 27.35 | 2.57 |
| 1426 | 2-Chloro-2-methylbutane | 22.47 | 25.02 | 25.04 | -2.57 |
| 1427 | 1-Octyne | 23.86 | 26.46 | 26.43 | -2.57 |
| 1428 | Diethyl malate | 37.14 | 34.58 | 34.57 | 2.57 |
| 1429 | Diethyl methylmalonate | 29.95 | 27.41 | 27.38 | 2.57 |
| 1430 | 3-(Hexylamino)propionitrile | 29.93 | 32.31 | 32.51 | -2.58 |
| 1431 | Benzalchloride | 39.19 | 36.94 | 36.60 | 2.59 |
| 1432 | 1,8-Octanediol dinitrate | 39.00 | 41.24 | 41.59 | -2.59 |
| 1433 | N-Nitrosodihexylamine | 30.07 | 32.23 | 32.66 | -2.59 |
| 1434 | Pentyl 2-naphthaleneacetate | 37.04 | 39.61 | 39.64 | -2.60 |
| 1435 | 1,1-Diisopentyloxyethane | 23.98 | 21.65 | 21.37 | 2.61 |
| 1436 | Ethyl undecanoate | 28.34 | 25.70 | 25.72 | 2.62 |
| 1437 | 1,4-Bis(heptanoyloxy)-2-butyne | 31.23 | 33.64 | 33.85 | -2.62 |
| 1438 | Diisoamyl ether | 23.02 | 20.43 | 20.39 | 2.63 |
| 1439 | 3-Methylpentane | 18.14 | 20.77 | 20.77 | -2.63 |
| 1440 | Glyceryl tributanoate | 30.85 | 33.45 | 33.48 | -2.63 |
| 1441 | Decyl hexanoate | 29.06 | 26.30 | 26.42 | 2.64 |
| 1442 | 4-Isopropylpyridine | 33.69 | 31.21 | 31.05 | 2.64 |
| 1443 | Cyclopentyl methyl ether | 26.43 | 29.24 | 29.07 | -2.64 |
| 1444 | 4-(2-Chlorobenzyl)-phenol | 43.63 | 45.95 | 46.27 | -2.64 |
| 1445 | Undecyl valerate | 28.86 | 26.30 | 26.21 | 2.65 |
| 1446 | 1-Chloronaphthalene | 41.04 | 38.59 | 38.39 | 2.65 |
| 1447 | trans-4-Methylcyclohexanol | 27.69 | 30.51 | 30.34 | -2.65 |
| 1448 | 1-Pentyl-3-methylimidazolium tetrafluoroborate | 42.90 | 45.14 | 45.55 | -2.65 |
| 1449 | t-Butylmercaptan | 20.51 | 22.61 | 23.17 | -2.66 |
| 1450 | 2-Pentyl 2-bromobutyrate | 28.35 | 30.82 | 31.02 | -2.67 |
| 1451 | N,N-Diethylbenzylamine | 29.79 | 31.88 | 32.46 | -2.67 |
| 1452 | 1-(2-Methoxyethyl)-1-methylpyrrolidinium tris(pentafluoroethyl)trifluorophosphate | 34.42 | 36.85 | 37.09 | -2.67 |
| 1453 | 2-Chlorophenol | 39.70 | 37.23 | 37.02 | 2.68 |
| 1454 | 1,2-Dibromoethane | 39.55 | 37.22 | 36.87 | 2.68 |
| 1455 | Propyl dodecanoate | 28.81 | 26.10 | 26.10 | 2.71 |
| 1456 | Diethylamine | 20.42 | 23.07 | 23.13 | -2.71 |
| 1457 | 2,3,3,4-Tetramethylpentane | 21.55 | 18.88 | 18.84 | 2.71 |
| 1458 | Bis(2-ethoxyethyl)phosphite | 33.96 | 31.45 | 31.24 | 2.72 |
| 1459 | 1-Propylamine | 22.37 | 25.11 | 25.09 | -2.72 |
| 1460 | 1,5-Pentanediol dinitrate | 43.05 | 40.64 | 40.33 | 2.72 |
| 1461 | 1-Hexyl-1,8-diazabicyclo(5,4,0)undec-7-enium dicyanamide | 32.57 | 30.44 | 29.84 | 2.73 |
| 1462 | Butyl iodoacetate | 33.09 | 35.70 | 35.82 | -2.73 |
| 1463 | 1-Propionaphthone | 43.49 | 41.09 | 40.76 | 2.73 |
| 1464 | Methyl-n-pentylether | 21.92 | 24.63 | 24.65 | -2.73 |
| 1465 | 1,6-Dibromohexane | 40.33 | 38.02 | 37.59 | 2.74 |
| 1466 | 2,4-Dichlorotoluene | 37.94 | 35.15 | 35.20 | 2.74 |
| 1467 | Methyl 3-methylcyclohexane-1,1-diacetate | 32.94 | 35.67 | 35.68 | -2.74 |
| 1468 | Bromocycloheptane | 34.42 | 31.85 | 31.68 | 2.74 |
| 1469 | Nitromethane | 36.53 | 34.29 | 33.79 | 2.74 |
| 1470 | 1-Hexyl-3-methylimidazolium glycine | 40.60 | 43.52 | 43.34 | -2.74 |
| 1471 | 2-Heptanoylthiophene | 34.36 | 37.17 | 37.11 | -2.75 |
| 1472 | Thiolane | 33.82 | 31.32 | 31.07 | 2.75 |
| 1473 | Di-n-propylsulfoxide | 32.60 | 35.35 |  | -2.75 |
| 1474 | Perfluoro-1,3,5-trimethylcyclohexane | 17.20 | 14.93 | 14.44 | 2.76 |
| 1475 | 1-Bromopropane | 25.86 | 28.64 | 28.62 | -2.76 |
| 1476 | cis-2,4,6-Trimethyl-1,3,5-trioxane | 26.16 | 27.86 | 28.92 | -2.76 |
| 1477 | Ethyl iodide | 28.46 | 31.06 | 31.22 | -2.76 |
| 1478 | 1,5-Diiodopentane | 45.54 | 43.06 | 42.77 | 2.77 |
| 1479 | Methyl 1-naphthoate | 44.09 | 41.35 | 41.32 | 2.77 |
| 1480 | 1,5-Dibromopentane | 40.56 | 37.82 | 37.79 | 2.77 |
| 1481 | N-Pentylpyridinium bis(trifluoromethanesulfonyl) amide | 32.50 | 34.85 | 35.27 | -2.77 |
| 1482 | Hexyloxybenzene | 31.23 | 33.62 | 34.01 | -2.78 |
| 1483 | s-Butylamine | 21.64 | 24.02 | 24.42 | -2.78 |
| 1484 | 1-Iodonaphthalene | 47.15 | 44.37 |  | 2.78 |
| 1485 | 3-(1-Methyl-2-pyrrolidinyl)pyridine | 38.85 | 41.45 | 41.63 | -2.78 |
| 1486 | Benzyl benzoate | 45.95 | 43.08 | 43.16 | 2.79 |
| 1487 | Allyl succinate | 33.70 | 30.92 | 30.91 | 2.79 |
| 1488 | Pentyl 2-picolinate | 34.62 | 37.02 | 37.41 | -2.79 |
| 1489 | Methyl 2-thiophenecarboxylate | 39.33 | 36.63 | 36.53 | 2.80 |
| 1490 | Aniline | 42.12 | 40.00 | 39.32 | 2.80 |
| 1491 | Perfluoro-1,2,4-trimethylcyclohexane | 17.30 | 14.93 | 14.50 | 2.80 |
| 1492 | 1,9-Nonanediol dinitrate | 38.80 | 41.44 | 41.61 | -2.81 |
| 1493 | Diethyl tartrate | 37.97 | 40.62 | 40.78 | -2.81 |
| 1494 | Tris(2-methoxyethyl) phosphite | 33.94 | 36.53 | 36.76 | -2.82 |
| 1495 | 3-(Pentylamino)propionitrile | 29.51 | 32.11 | 32.33 | -2.82 |
| 1496 | 1-Propyl-3-methylimidazolium aminoacetate | 45.60 | 42.92 | 42.78 | 2.82 |
| 1497 | Dimethyl pentylmalonate | 30.50 | 33.29 | 33.32 | -2.82 |
| 1498 | Methyl propanoate | 23.81 | 26.64 | 26.64 | -2.83 |
| 1499 | 1-Tridecene | 25.80 | 22.97 | 22.97 | 2.83 |
| 1500 | 2-Heptylpyridine | 30.84 | 33.38 | 33.67 | -2.83 |
| 1501 | Methyl-n-propylketone | 23.59 | 26.38 | 26.42 | -2.83 |
| 1502 | Ethyl 2-naphthoate | 41.64 | 38.81 | 38.80 | 2.84 |
| 1503 | cis-1,3-Dimethylcyclohexane | 22.63 | 25.46 | 25.47 | -2.84 |
| 1504 | 1-Ethyl-3-methylimidazolium dimethylphosphate | 44.30 | 41.94 | 41.46 | 2.84 |
| 1505 | Perfluorononane | 14.40 | 11.51 | 11.56 | 2.84 |
| 1506 | Butyl 10-undecenoate | 29.61 | 26.82 | 26.76 | 2.85 |
| 1507 | Dihexylamine | 27.45 | 24.67 | 24.60 | 2.85 |
| 1508 | Ethyl 10-undecenoate | 29.24 | 26.42 | 26.39 | 2.85 |
| 1509 | 1-Ethyl-3-methylimidazolium propyltrifluoroborate | 38.00 | 35.15 |  | 2.85 |
| 1510 | 1-(3-Aminopropyl)-3-methylimidazolium tetrafluoroborate | 47.10 | 49.99 | 49.97 | -2.87 |
| 1511 | 1-Ethyl-3-methylimidazolium tris(pentafluoroethyl)trifluorophosphate | 34.80 | 32.03 | 31.93 | 2.87 |
| 1512 | (9Z)-Octadecenoic acid | 32.80 | 30.20 | 29.92 | 2.88 |
| 1513 | Methyl 4-methylcyclohexane-1,1-diacetate | 32.89 | 35.67 | 35.77 | -2.88 |
| 1514 | Tris(2-ethylhexyl) tricarballylate | 29.60 | 32.26 | 32.48 | -2.88 |
| 1515 | 1-Hexyl-3-methylimidazolium chloride | 41.80 | 43.48 | 44.69 | -2.89 |
| 1516 | 2,5-Dimethylthiophene | 30.45 | 28.72 | 27.56 | 2.89 |
| 1517 | 1-Iodobutane | 28.76 | 31.46 | 31.65 | -2.89 |
| 1518 | m-Cresol | 35.69 | 33.21 | 32.80 | 2.89 |
| 1519 | Propenal | 23.14 | 25.70 | 26.04 | -2.90 |
| 1520 | 2,3-Dimethyl-3-ethylpentane | 22.94 | 20.01 | 20.04 | 2.90 |
| 1521 | Isopentyl chloride | 23.36 | 26.28 | 26.26 | -2.90 |
| 1522 | Isobutyl bromide | 24.84 | 27.71 | 27.75 | -2.91 |
| 1523 | 1-Bromobutane | 25.90 | 28.84 | 28.82 | -2.92 |
| 1524 | 1-Propyl-3-methylimidazolium bis(trifluoromethanesulfonyl) amide | 34.87 | 31.93 | 31.94 | 2.93 |
| 1525 | 1,2-Dichloropropane | 28.94 | 31.66 | 31.87 | -2.93 |
| 1526 | Suberone | 34.66 | 31.72 | 31.72 | 2.94 |
| 1527 | Dimethyl maleate | 38.29 | 35.26 | 35.35 | 2.94 |
| 1528 | Propyl 10-undecenoate | 29.49 | 26.62 | 26.54 | 2.95 |
| 1529 | Methyl formate | 25.15 | 27.82 | 28.10 | -2.95 |
| 1530 | Hexyl 2-naphthoate | 36.79 | 39.61 | 39.74 | -2.95 |
| 1531 | n-Propylnitrate | 27.20 | 30.05 | 30.16 | -2.96 |
| 1532 | Perfluorotripropylamine | 15.20 | 18.18 |  | -2.98 |
| 1533 | Ethyl thiophene-2-carboxylate | 36.97 | 34.09 | 33.98 | 2.99 |
| 1534 | Vinylidenechloride | 21.66 | 24.66 |  | -3.00 |
| 1535 | Propyl tridecanoate | 29.30 | 26.30 | 26.29 | 3.01 |
| 1536 | Isopropyl formate | 22.27 | 25.15 | 25.28 | -3.01 |
| 1537 | 1-Hexyl-3-methylimidazolium tricyanomethanide | 43.55 | 46.57 |  | -3.02 |
| 1538 | Dimethyl succinate | 36.62 | 33.62 | 33.59 | 3.03 |
| 1539 | 3,8-Diethyldecane | 26.10 | 23.16 | 23.07 | 3.03 |
| 1540 | 2-Chlorobenzyl phenyl ether | 42.31 | 45.36 | 45.34 | -3.03 |
| 1541 | Pentaerythritol tetra(perfluorobutyrate) | 18.50 | 21.18 | 21.54 | -3.04 |
| 1542 | Pentyl cyanoacetate | 29.77 | 32.94 | 32.81 | -3.04 |
| 1543 | DMSO | 42.50 | 39.45 |  | 3.05 |
| 1544 | Dichloroacetic acid | 35.90 | 33.05 | 32.85 | 3.05 |
| 1545 | N-Nitrosodiethylamine | 33.07 | 30.63 | 30.01 | 3.06 |
| 1546 | 1,1-Dichloroethane | 24.66 | 27.35 | 27.72 | -3.06 |
| 1547 | 2-Octylnaphthalene | 33.68 | 36.51 | 36.75 | -3.07 |
| 1548 | 3,5-Lutidine | 33.82 | 30.87 | 30.75 | 3.07 |
| 1549 | Pentyl isonicotinate | 33.92 | 36.78 | 36.99 | -3.07 |
| 1550 | Trimethyl decylammonium bis(trifluoromethylsulfonyl)amide | 35.42 | 37.60 | 38.49 | -3.07 |
| 1551 | Cyclohexanone | 34.57 | 31.52 | 31.49 | 3.08 |
| 1552 | 1-(2-Methoxyethyl)-1-methylpiperidinium tris(pentafluoroethyl)trifluorophosphate | 34.63 | 37.05 | 37.71 | -3.08 |
| 1553 | 1-Fluorooctane | 24.03 | 21.63 | 20.94 | 3.09 |
| 1554 | 2-Methoxycyclopentanol | 38.10 | 35.28 | 35.00 | 3.10 |
| 1555 | Epichlorohydrin | 36.04 | 33.05 | 32.94 | 3.10 |
| 1556 | cis-2-Hexene | 19.10 | 22.28 | 22.21 | -3.11 |
| 1557 | 1-Hexene | 18.52 | 21.36 | 21.64 | -3.12 |
| 1558 | 3,4-Xylenol | 28.92 | 32.14 | 32.05 | -3.13 |
| 1559 | 1-Butyl-3-methylimidazolium threoninate | 51.10 | 48.27 | 47.97 | 3.13 |
| 1560 | Dimethylpropylisopropylammonium bis(trifluoromethylsulfonyl)amide | 34.30 | 31.79 | 31.16 | 3.14 |
| 1561 | Bis(9-H-perfluorononyl) 3-t-butyladipate | 24.90 | 22.47 | 21.74 | 3.16 |
| 1562 | n-Butylmethylsulfide | 26.23 | 29.03 | 29.39 | -3.16 |
| 1563 | Methyl 3-methylcyclopentane-1,1-diacetate | 32.12 | 35.47 | 35.29 | -3.17 |
| 1564 | Diethyl sebacate | 32.76 | 29.74 | 29.59 | 3.17 |
| 1565 | 1,2-Dicyclohexyloxycyclohexane | 36.50 | 39.22 | 39.67 | -3.17 |
| 1566 | Methanesulfonic acid | 50.50 | 47.30 |  | 3.20 |
| 1567 | 1-Butyl-3-methylimidazolium ethosulfate | 36.38 | 39.14 | 39.58 | -3.20 |
| 1568 | Pentyl nitrite | 22.75 | 25.95 |  | -3.20 |
| 1569 | 4-Methyl-2-thiapentane | 25.07 | 27.90 | 28.27 | -3.20 |
| 1570 | 3-Methylpyridine | 35.04 | 31.94 | 31.84 | 3.20 |
| 1571 | N-Butyl-3-methyl-pyridinium dicyanoamide | 43.40 | 45.75 | 46.60 | -3.20 |
| 1572 | 4-t-Butylpyridine | 33.58 | 30.46 | 30.37 | 3.21 |
| 1573 | Diethyl suberate | 32.60 | 29.34 | 29.39 | 3.21 |
| 1574 | Perfluoropentane | 9.89 | 13.07 | 13.11 | -3.22 |
| 1575 | 1-Methylnaphthalene | 38.09 | 34.90 | 34.87 | 3.22 |
| 1576 | Hexyl 1-naphthoate | 36.58 | 39.61 | 39.80 | -3.22 |
| 1577 | Ethyl trans-decalin-2,2-diacetate | 34.39 | 37.54 | 37.62 | -3.23 |
| 1578 | 3-Chloronitrobenzene | 46.87 | 44.03 | 43.63 | 3.24 |
| 1579 | 2-Propionylthiophene | 39.55 | 36.37 | 36.31 | 3.24 |
| 1580 | Ethyl vinyl ether | 19.00 | 21.74 | 22.24 | -3.24 |
| 1581 | Dodecyl butyrate | 29.32 | 26.30 | 26.07 | 3.25 |
| 1582 | 1-Ethylnaphthalene | 38.47 | 35.13 | 35.21 | 3.26 |
| 1583 | N,N-Diethylaniline | 34.51 | 32.01 | 31.25 | 3.26 |
| 1584 | Pentyl 1-naphthaleneacetate | 36.34 | 39.61 | 39.60 | -3.26 |
| 1585 | Diethyl O-valerylmalate | 29.81 | 33.05 | 33.08 | -3.27 |
| 1586 | Diethyl phosphite | 30.96 | 27.79 | 27.69 | 3.27 |
| 1587 | Pentadecyl formate | 30.89 | 27.88 | 27.62 | 3.27 |
| 1588 | 1-Octyl-3-methylimidazolium hexafluorophosphate | 36.50 | 39.19 | 39.77 | -3.27 |
| 1589 | 2-Methylpentane | 17.38 | 20.77 | 20.66 | -3.28 |
| 1590 | Diethyl O-hexanoylmalate | 29.85 | 33.25 | 33.13 | -3.28 |
| 1591 | Heptyl isonicotinate | 33.81 | 37.18 | 37.11 | -3.30 |
| 1592 | 1,4-Dibromobutane | 40.86 | 37.62 | 37.55 | 3.31 |
| 1593 | Acetone O-methyloxime | 22.85 | 25.93 | 26.16 | -3.31 |
| 1594 | 1-Propyl-2,3-dimethylimidazolium bis(trifluoromethanesulfonyl) amide | 41.00 | 37.68 |  | 3.32 |
| 1595 | 1-Octyl-1,8-diazabicyclo(5,4,0)undec-7-enium thiocyanate | 31.85 | 34.50 | 35.17 | -3.32 |
| 1596 | Pentyl 1-naphthylketone | 38.56 | 41.69 | 41.88 | -3.32 |
| 1597 | Methyl acrylate | 24.23 | 27.36 | 27.56 | -3.33 |
| 1598 | Methylthiocyanate | 38.05 | 35.56 | 34.70 | 3.35 |
| 1599 | Diethyl succinate | 31.89 | 28.54 | 28.53 | 3.36 |
| 1600 | Isobutyl propanoate | 26.64 | 23.37 | 23.28 | 3.36 |
| 1601 | Ethyl 2-picolinate | 39.72 | 36.42 | 36.36 | 3.36 |
| 1602 | 1-Cyanonaphthalene | 46.40 | 42.81 | 43.04 | 3.36 |
| 1603 | 4-s-Butylpyridine | 34.71 | 31.41 | 31.33 | 3.38 |
| 1604 | Propargyl acetate | 32.81 | 29.46 | 29.42 | 3.39 |
| 1605 | 1-Pentyl-3-methylimidazolium hexafluorophosphate | 41.24 | 38.59 | 37.84 | 3.40 |
| 1606 | Benzenesulfonylchloride | 43.25 | 43.36 | 39.84 | 3.41 |
| 1607 | Diethyl O-nonanoylmalate | 30.41 | 33.85 | 33.82 | -3.41 |
| 1608 | 2,2,3,3,4,4,5,5-Octafluoro-1,6-hexanediol dibutyrate | 23.90 | 27.38 | 27.31 | -3.41 |
| 1609 | 1-Bromonaphthalene | 44.19 | 41.78 | 40.77 | 3.42 |
| 1610 | Acetophenone | 39.04 | 35.57 | 35.62 | 3.42 |
| 1611 | Hexyl nicotinate | 33.71 | 36.98 | 37.15 | -3.44 |
| 1612 | Pristane | 26.24 | 23.10 | 22.80 | 3.44 |
| 1613 | Diethyl malonate | 31.71 | 28.34 | 28.27 | 3.44 |
| 1614 | Methylcyclopentane | 22.30 | 25.71 | 25.75 | -3.45 |
| 1615 | Benzyl 2-chlorophenyl ether | 42.16 | 45.36 | 45.62 | -3.46 |
| 1616 | Hexyl isonicotinate | 33.46 | 36.98 | 36.92 | -3.46 |
| 1617 | p-Toluidine | 36.06 | 38.93 | 39.52 | -3.46 |
| 1618 | Hexane | 18.40 | 21.90 | 21.87 | -3.47 |
| 1619 | 3-Methylcyclopentene | 22.68 | 26.09 | 26.16 | -3.48 |
| 1620 | 1-Octyl-3-methylimidazolium tris(pentafluoroethyl)trifluorophosphate | 30.30 | 33.23 | 33.78 | -3.48 |
| 1621 | Hexyl 2-picolinate | 34.12 | 37.22 | 37.61 | -3.49 |
| 1622 | 1,1-Dimethylcyclopentane | 21.75 | 25.20 | 25.24 | -3.49 |
| 1623 | Diheptyl ether | 26.99 | 23.49 | 23.49 | 3.50 |
| 1624 | Ethyl myristate | 29.78 | 26.30 | 26.28 | 3.50 |
| 1625 | 1-Butyl-3-methylimidazolium hexafluorophosphate | 40.90 | 38.39 | 37.40 | 3.50 |
| 1626 | 2-Chlorobutane | 21.51 | 24.71 | 25.01 | -3.50 |
| 1627 | Diethyl adipate | 32.38 | 28.94 | 28.87 | 3.51 |
| 1628 | 1,2-Diethoxycyclopentane | 31.90 | 28.20 | 28.39 | 3.51 |
| 1629 | Acetaldehyde | 21.18 | 24.78 | 24.69 | -3.51 |
| 1630 | 3-Methoxypropionitrile | 35.88 | 32.47 | 32.37 | 3.51 |
| 1631 | Tetramethylsilane | 12.85 | 13.83 | 16.37 | -3.52 |
| 1632 | 2,2,3,3-Tetramethylpentane | 22.49 | 19.06 | 18.97 | 3.52 |
| 1633 | Neohexane | 16.31 | 19.82 | 19.84 | -3.53 |
| 1634 | Methyl t-butyl sulfide | 23.48 | 26.09 | 27.02 | -3.54 |
| 1635 | Methyl trans-decalin-2,2-diacetate | 36.41 | 40.08 | 39.95 | -3.54 |
| 1636 | 1,3-Dipropylimidazolium bis(trifluoromethylsulfonyl) amide | 32.40 | 29.10 | 28.85 | 3.55 |
| 1637 | Perfluoro-1-methyl-4-isopropylcyclohexane | 17.50 | 14.54 | 13.95 | 3.55 |
| 1638 | 2-Butanol | 22.54 | 26.10 | 26.09 | -3.55 |
| 1639 | 3-Methoxyphenol | 42.20 | 39.32 | 38.65 | 3.55 |
| 1640 | 1-Ethyl-3-methylimidazolium bis(trifluoromethanesulfonyl) amide | 35.10 | 31.73 | 31.53 | 3.57 |
| 1641 | Heptyl 2-thiophenecarboxylate | 31.72 | 35.09 | 35.29 | -3.57 |
| 1642 | Diisopropyl ether | 17.80 | 21.23 | 21.37 | -3.57 |
| 1643 | 4-Methylpyridine | 35.43 | 31.94 | 31.85 | 3.58 |
| 1644 | 1-Heptyne | 22.68 | 26.23 | 26.26 | -3.58 |
| 1645 | Nitrobenzene | 44.02 | 41.08 | 40.44 | 3.58 |
| 1646 | 1,6-Dimethylnaphthalene | 37.42 | 33.86 | 33.83 | 3.59 |
| 1647 | 1-Chlorobutane | 23.74 | 27.21 | 27.33 | -3.59 |
| 1648 | Methyl 1-naphthaleneacetate | 45.14 | 41.55 | 41.54 | 3.60 |
| 1649 | Diethyl glutarate | 32.32 | 28.74 | 28.71 | 3.61 |
| 1650 | 2-Chloroethanol | 36.55 | 33.18 | 32.93 | 3.62 |
| 1651 | 1-Butyl-2,3-dimethylimidazolium bis(trifluoromethanesulfonyl) amide | 34.26 | 37.88 |  | -3.62 |
| 1652 | Tridecyl propionate | 29.84 | 26.30 | 26.21 | 3.63 |
| 1653 | Perfluorotrihexylamine | 18.30 | 14.67 |  | 3.63 |
| 1654 | Hexyl 2-naphthaleneacetate | 36.22 | 39.81 | 39.85 | -3.63 |
| 1655 | 1-Butyl-3-methylimidazolium iodide | 46.40 | 43.08 | 42.76 | 3.64 |
| 1656 | Diethyl O-heptanoylmalate | 29.84 | 33.45 | 33.48 | -3.64 |
| 1657 | Ethanol | 22.39 | 26.03 | 26.05 | -3.66 |
| 1658 | Phenylacetonitrile | 41.36 | 37.69 | 37.66 | 3.70 |
| 1659 | Ethyl trans-hexahydroindane-2,2-diacetate | 33.91 | 37.34 | 37.61 | -3.70 |
| 1660 | Methyl 3-phenylhydracrylate | 38.91 | 42.47 | 42.61 | -3.70 |
| 1661 | 1,10-Decanediol dinitrate | 38.25 | 41.64 | 41.97 | -3.72 |
| 1662 | 3-(Dipentylamino)propionitrile | 28.73 | 31.93 | 32.45 | -3.72 |
| 1663 | Diisopropoxymethane | 20.97 | 23.53 | 24.70 | -3.73 |
| 1664 | 1-Tetradecene | 26.75 | 23.20 | 23.02 | 3.73 |
| 1665 | 1,5-Hexadiene | 18.87 | 22.08 | 22.61 | -3.74 |
| 1666 | 1-Heptyl-3-methylimidazolium hexafluorophosphate | 35.89 | 38.99 | 39.63 | -3.74 |
| 1667 | Glyme | 24.61 | 28.40 | 28.40 | -3.79 |
| 1668 | 2-(2-Hydroxyethyl)-thiophene | 40.30 | 36.42 | 36.49 | 3.81 |
| 1669 | Diethyl perfluoroadipate | 22.70 | 26.58 | 26.53 | -3.83 |
| 1670 | 1,4-Butanediol dinitrate | 43.80 | 40.44 | 39.96 | 3.84 |
| 1671 | 1-Pentadecene | 27.31 | 23.43 | 23.47 | 3.84 |
| 1672 | trans-1,3-Butadienylbenzene | 36.21 | 32.51 | 32.37 | 3.84 |
| 1673 | Tetraethylene glycol dodecyl ether | 31.70 | 35.35 | 35.55 | -3.85 |
| 1674 | Tetradecyl acetate | 30.28 | 26.30 | 26.42 | 3.86 |
| 1675 | Cyclobutanecarboxylic acid | 33.62 | 29.77 | 29.76 | 3.86 |
| 1676 | 1-Fluorobutane | 17.72 | 20.83 | 21.59 | -3.87 |
| 1677 | 3-Methyl-4-(2,2,6-trimethylcyclohexyl)-2-butanol | 31.26 | 27.57 | 27.38 | 3.88 |
| 1678 | 1,2-Dibutoxycyclohexane | 33.10 | 29.20 | 29.22 | 3.88 |
| 1679 | Trihexyl tetradecyl phosphonium methylsulfonate | 31.00 | 31.70 | 34.88 | -3.88 |
| 1680 | N-Propylpyridinium tetrafluoroborate | 50.97 | 47.26 | 47.08 | 3.89 |
| 1681 | Phenol | 38.20 | 34.28 | 34.30 | 3.90 |
| 1682 | Diethyl oxalate | 32.08 | 28.14 | 28.17 | 3.91 |
| 1683 | 2-Methylpropanal | 20.31 | 24.05 | 24.22 | -3.91 |
| 1684 | Cyclopentane | 22.61 | 26.40 | 26.52 | -3.91 |
| 1685 | Dimethyl malonate | 37.37 | 33.42 | 33.45 | 3.92 |
| 1686 | Acetic anhydride | 31.93 | 29.04 | 28.00 | 3.93 |
| 1687 | Heptyl 1-naphthoate | 35.87 | 39.81 | 39.80 | -3.93 |
| 1688 | 1-(Chloromethyl)naphthalene | 45.46 | 41.72 | 41.50 | 3.96 |
| 1689 | Heptyl nicotinate | 33.28 | 37.18 | 37.25 | -3.97 |
| 1690 | Isobutyl chloride | 22.20 | 26.08 | 26.20 | -4.00 |
| 1691 | Di-n-octylether | 27.72 | 23.89 | 23.72 | 4.00 |
| 1692 | 2-(2-Methoxyethoxy)ethanol | 28.49 | 32.23 | 32.49 | -4.00 |
| 1693 | Hexyl 1-naphthaleneacetate | 35.79 | 39.81 | 39.80 | -4.01 |
| 1694 | Benzaldehyde | 38.00 | 34.37 | 33.98 | 4.02 |
| 1695 | Triisoamylamine | 24.34 | 20.70 | 20.32 | 4.02 |
| 1696 | Ethyl methyl sulfide | 25.06 | 28.63 | 29.09 | -4.03 |
| 1697 | Perfluoromethylcyclohexane | 15.70 | 19.55 | 19.73 | -4.03 |
| 1698 | Glyceryltriacetate | 36.26 | 32.25 | 32.22 | 4.04 |
| 1699 | Dibutyl phthalate | 33.40 | 37.46 | 37.45 | -4.05 |
| 1700 | 1-Ethyl-3-methylimidazolium ethosulfate | 42.50 | 38.74 | 38.44 | 4.06 |
| 1701 | Vinyl acetate | 23.95 | 26.88 | 28.02 | -4.07 |
| 1702 | Ethyl isothiocyanate | 36.04 | 33.28 | 31.96 | 4.08 |
| 1703 | Diethyl O-octanoylmalate | 29.70 | 33.65 | 33.78 | -4.08 |
| 1704 | Cyclopentene | 22.95 | 26.99 | 27.05 | -4.10 |
| 1705 | Trimethylphosphite | 27.18 | 31.04 | 31.28 | -4.10 |
| 1706 | 2-Methyl-1-penten-4-one | 23.00 | 26.94 | 27.11 | -4.11 |
| 1707 | 2-Methyloctanal | 21.44 | 25.05 | 25.55 | -4.11 |
| 1708 | Methyl 2-methylacetoacetate | 36.03 | 32.03 | 31.90 | 4.13 |
| 1709 | 1-(2-Aminoethyl)-3-methylimidazolium tetrafluoroborate | 53.50 | 49.79 | 49.36 | 4.14 |
| 1710 | 1-Ethyl-3-methylimidazolium methylsulfate | 45.10 | 41.28 | 40.95 | 4.15 |
| 1711 | trans-2-Hexene | 18.08 | 22.28 | 22.24 | -4.16 |
| 1712 | trans-2-Butene-1,4-diol | 38.58 | 34.44 | 34.41 | 4.17 |
| 1713 | Diethyl O-decanoylmalate | 29.91 | 34.05 | 34.09 | -4.18 |
| 1714 | Tetrahydrofurfuryl alcohol | 37.00 | 32.67 | 32.81 | 4.19 |
| 1715 | Isopentene | 16.51 | 20.77 | 20.70 | -4.19 |
| 1716 | Octyl vinyl ether | 26.32 | 22.94 | 22.09 | 4.23 |
| 1717 | 1-(2-Hydroxyethyl)-3-methylimidazolium bis(trifluoromethanesulfonyl) amide | 34.00 | 38.10 | 38.24 | -4.24 |
| 1718 | Triisopropyl borate | 19.02 | 22.45 | 23.27 | -4.25 |
| 1719 | Trimethylethylene | 17.64 | 21.69 | 21.89 | -4.25 |
| 1720 | 1-Pentyl-3-methylimidazolium acetate | 34.10 | 38.07 | 38.35 | -4.25 |
| 1721 | Methyl trans-hexahydroindane-2,2-diacetate | 35.67 | 39.88 | 39.95 | -4.28 |
| 1722 | Cetene | 27.75 | 23.66 | 23.46 | 4.29 |
| 1723 | Bromoethane | 24.20 | 28.44 | 28.50 | -4.30 |
| 1724 | 2-Methyl-2-propanol | 20.41 | 24.63 | 24.71 | -4.30 |
| 1725 | 3,5-Xylenol | 28.04 | 32.14 | 32.34 | -4.30 |
| 1726 | Pyridine | 37.21 | 33.01 | 32.90 | 4.31 |
| 1727 | 1-Heptadecene | 28.14 | 23.89 | 23.81 | 4.33 |
| 1728 | Tris(5-H-perfluoropentyl) tricarballylate | 27.20 | 30.64 | 31.54 | -4.34 |
| 1729 | Triethanolamine | 45.24 | 41.40 | 40.87 | 4.37 |
| 1730 | Allyl chloride | 23.61 | 27.73 | 28.02 | -4.41 |
| 1731 | 2-Methylacrylonitrile | 24.40 | 28.66 | 28.82 | -4.42 |
| 1732 | cis-3-Hexene | 17.93 | 22.28 | 22.35 | -4.42 |
| 1733 | Methylcyanoacetate | 39.17 | 34.88 | 34.74 | 4.43 |
| 1734 | 1-Butyl-3-methylimidazolium L-alanine | 46.10 | 42.03 | 41.66 | 4.44 |
| 1735 | 2-Hydroxybenzaldehyde | 42.90 | 38.33 | 38.46 | 4.44 |
| 1736 | Ethyl ether | 17.11 | 21.49 | 21.55 | -4.44 |
| 1737 | 1,6-Bis(7-H-perfluoroheptoxy)hexane | 25.30 | 21.62 | 20.85 | 4.45 |
| 1738 | Heptyl 2-picolinate | 33.28 | 37.42 | 37.73 | -4.45 |
| 1739 | 1,4-Bis(propanoyloxy)-2-butyne | 36.16 | 32.04 | 31.69 | 4.47 |
| 1740 | 1,2-Propanediol | 36.51 | 32.27 | 32.04 | 4.47 |
| 1741 | Ethyl cyanoacetate | 36.62 | 32.34 | 32.13 | 4.49 |
| 1742 | n-Butyl methyl ether | 20.05 | 24.43 | 24.54 | -4.49 |
| 1743 | 1,2-Bis(4-tolyl)ethane | 33.60 | 37.58 | 38.09 | -4.49 |
| 1744 | Heptyl 2-naphthaleneacetate | 35.69 | 40.01 | 40.19 | -4.50 |
| 1745 | 2-Propyn-1-formate | 35.00 | 30.84 | 30.50 | 4.50 |
| 1746 | 1-Propyl-3-methylimidazolium tetracyanoborate | 46.00 | 42.30 | 41.49 | 4.51 |
| 1747 | 1,2-Dipropoxycyclohexane | 33.50 | 28.80 | 28.97 | 4.53 |
| 1748 | Pentaethylene glycol octyl ether | 32.17 | 36.38 | 36.70 | -4.53 |
| 1749 | 1,4-Diiodobutane | 47.08 | 42.86 | 42.53 | 4.55 |
| 1750 | 1-Octadecene | 28.45 | 24.12 | 23.87 | 4.58 |
| 1751 | 2-Propanol | 21.35 | 25.90 | 25.93 | -4.58 |
| 1752 | Dimethyl ethylphosphonate | 36.63 | 32.58 | 32.05 | 4.58 |
| 1753 | 2-Propyne-1-ol | 36.05 | 31.59 | 31.45 | 4.60 |
| 1754 | cis-2-Pentene | 17.39 | 22.05 | 21.99 | -4.60 |
| 1755 | Formaldehyde diethylacetal | 20.29 | 23.79 | 24.90 | -4.61 |
| 1756 | Isopropylamine | 19.53 | 23.82 | 24.15 | -4.62 |
| 1757 | Thiane | 36.11 | 31.52 | 31.44 | 4.67 |
| 1758 | Glycerol tricaproate | 29.93 | 34.65 | 34.62 | -4.69 |
| 1759 | 2-Methoxyethyl dihydrogen phosphate | 36.61 | 32.74 | 31.92 | 4.69 |
| 1760 | Butyl thiocyanate | 30.42 | 33.71 | 35.12 | -4.70 |
| 1761 | Methyl picolinate | 43.48 | 38.96 | 38.78 | 4.70 |
| 1762 | 2-Pyridinecarboxaldehyde | 41.53 | 37.30 | 36.83 | 4.70 |
| 1763 | 1-Fluoronaphthalene | 38.21 | 34.28 | 33.50 | 4.71 |
| 1764 | Heptaethylene glycol | 48.39 | 43.38 | 43.67 | 4.72 |
| 1765 | trans-3-Hexene | 17.64 | 22.28 | 22.37 | -4.73 |
| 1766 | 1-Ethyl-3-methylimidazolium trifluoromethylsulfonate | 39.20 | 35.58 | 34.46 | 4.74 |
| 1767 | Butylisothiocyanate | 30.42 | 33.68 | 35.16 | -4.74 |
| 1768 | 1-Hexanesulfonylchloride | 31.10 | 34.69 | 35.85 | -4.75 |
| 1769 | 1-Hexyl-3-methylimidazolium tetrafluoroborate | 41.00 | 45.34 | 45.77 | -4.77 |
| 1770 | Heptyl 1-naphthaleneacetate | 35.18 | 40.01 | 39.96 | -4.78 |
| 1771 | Campholanic acid | 32.21 | 27.56 | 27.35 | 4.86 |
| 1772 | 1-Ethyl-3-propylimidazolium bis(trifluoromethanesulfonyl) amide | 33.41 | 28.90 | 28.53 | 4.88 |
| 1773 | Ethanediol diacetate | 33.01 | 28.14 | 28.11 | 4.90 |
| 1774 | Dimethyl phosphite | 37.58 | 32.87 | 32.59 | 4.99 |
| 1775 | trans-2-Pentene | 17.14 | 22.05 | 22.16 | -5.02 |
| 1776 | Benzylamine | 39.07 | 34.50 | 34.04 | 5.03 |
| 1777 | 1-Hexyl-1,8-diazabicyclo(5,4,0)undec-7-enium thiocyanate | 37.98 | 34.10 | 32.87 | 5.11 |
| 1778 | 1-Chloropropane | 21.92 | 27.01 | 27.05 | -5.13 |
| 1779 | Pentaethylene glycol dodecyl ether | 32.00 | 37.18 | 37.14 | -5.14 |
| 1780 | Cyclopropanecarboxylic acid | 34.48 | 29.57 | 29.33 | 5.15 |
| 1781 | 3-Ethyl-4-methylpyridine | 36.02 | 31.07 | 30.86 | 5.16 |
| 1782 | 1-Butyl-3-methylimidazolium dimethylphosphate | 38.00 | 42.34 | 43.17 | -5.17 |
| 1783 | 1-Pentene | 16.00 | 21.13 | 21.17 | -5.17 |
| 1784 | Octyl octanoate | 31.43 | 26.30 | 26.25 | 5.18 |
| 1785 | 1-Propanesulfonylchloride | 38.00 | 34.09 | 32.81 | 5.19 |
| 1786 | Dibutyl perfluoroadipate | 22.20 | 27.38 | 27.39 | -5.19 |
| 1787 | Tributyl phosphate | 25.14 | 29.41 | 30.34 | -5.20 |
| 1788 | 2-Chloropropane | 19.69 | 24.51 | 24.89 | -5.20 |
| 1789 | 1,3-Dioxolane | 32.61 | 28.33 | 27.40 | 5.21 |
| 1790 | Trichlorotoluene | 40.84 | 36.19 | 35.60 | 5.24 |
| 1791 | Ethylamine | 19.89 | 24.91 | 25.13 | -5.24 |
| 1792 | 1-Hexyne | 20.98 | 26.00 | 26.25 | -5.27 |
| 1793 | Isopentane | 14.99 | 20.33 | 20.28 | -5.29 |
| 1794 | n-Butylstearate | 32.70 | 27.50 | 27.40 | 5.30 |
| 1795 | Campholenic acid | 35.12 | 29.97 | 29.82 | 5.30 |
| 1796 | 1,3-Butyleneglycol | 37.80 | 32.47 | 32.47 | 5.33 |
| 1797 | 1,2-Dimethylnaphthalene | 39.20 | 33.86 | 33.83 | 5.37 |
| 1798 | 1-Hexyl-3-methylimidazolium trifluoromethylsulfonate | 32.58 | 36.38 | 37.96 | -5.38 |
| 1799 | 2-(2-Chloroethoxy)ethyl-2-(2-hydroxyethoxy)ethyl ether | 43.62 | 38.67 | 38.21 | 5.41 |
| 1800 | 1-Ethyl-3-methylimidazolium lactate | 48.80 | 43.71 | 43.38 | 5.42 |
| 1801 | Aziridine | 32.80 | 27.61 | 27.38 | 5.42 |
| 1802 | n-Butylnitrite | 31.21 | 25.75 |  | 5.46 |
| 1803 | Heptyl 1-naphthylketone | 36.77 | 42.09 | 42.23 | -5.46 |
| 1804 | 1-Hexyl-3-methylimidazolium acetate | 33.00 | 38.27 | 38.47 | -5.47 |
| 1805 | Pentane | 16.05 | 21.46 | 21.52 | -5.47 |
| 1806 | 1-Ethyl-3-methylimidazolium L-proline | 39.60 | 44.73 | 45.09 | -5.49 |
| 1807 | Diethyl bromomethylmalonate | 30.77 | 36.19 | 36.27 | -5.50 |
| 1808 | 1-Ethyl-3-methylimidazolium aminoacetate | 48.10 | 42.72 | 42.54 | 5.56 |
| 1809 | Hexaethylene glycol octyl ether | 32.85 | 38.21 | 38.41 | -5.56 |
| 1810 | Azelaonitrile | 42.83 | 37.54 | 37.23 | 5.60 |
| 1811 | 1-Acetonaphthone | 46.16 | 40.89 | 40.56 | 5.60 |
| 1812 | Hexyl 1-naphthylketone | 36.47 | 41.89 | 42.08 | -5.61 |
| 1813 | Perfluoro-2-methyldecalin | 19.20 | 23.33 | 24.91 | -5.71 |
| 1814 | 1,2-Diethoxycyclohexane | 33.90 | 28.40 | 28.17 | 5.73 |
| 1815 | 2,4-Dichloronitrobenzene | 42.77 | 46.98 | 48.51 | -5.74 |
| 1816 | 1,4-Dioxane | 33.45 | 27.86 | 27.69 | 5.76 |
| 1817 | 1-Butyl-1-methylpyrrolidinium tris(pentafluoroethyl)trifluorophosphate | 38.00 | 32.88 | 32.21 | 5.79 |
| 1818 | 1,3-Diiodopropane | 47.87 | 42.66 | 42.08 | 5.79 |
| 1819 | 3-Methyl-1-butene | 14.36 | 20.00 | 20.20 | -5.84 |
| 1820 | Benzylbromide | 32.33 | 38.03 | 38.17 | -5.84 |
| 1821 | 4-Acetylpyridine | 44.01 | 38.26 | 38.16 | 5.85 |
| 1822 | DEHP | 31.20 | 36.80 | 37.05 | -5.85 |
| 1823 | 1-Octyl-3-methylimidazolium tetracyanoborate | 38.60 | 43.30 | 44.48 | -5.88 |
| 1824 | 1,3-Propanediol dinitrate | 45.60 | 40.24 | 39.69 | 5.91 |
| 1825 | Isobutyl isobutyrate | 28.38 | 22.44 | 22.46 | 5.92 |
| 1826 | 1,2-Diisopropoxycyclohexane | 33.40 | 28.14 | 27.45 | 5.95 |
| 1827 | 2,2,4,4,6,8,8-Heptamethylnonane | 24.32 | 18.93 | 18.32 | 6.00 |
| 1828 | 1-Butyl-3-methylimidazolium chloride | 48.20 | 43.08 | 42.16 | 6.04 |
| 1829 | 1-Ethyl-3-(6-hydroxyhexyl)-imidazolium chloride | 42.30 | 46.82 | 48.37 | -6.07 |
| 1830 | Methanol | 22.50 | 28.57 | 28.60 | -6.10 |
| 1831 | 2-Ethoxyethylacetate | 31.80 | 25.73 | 25.66 | 6.14 |
| 1832 | 1-Naphthaleneacetonitrile | 48.95 | 43.01 | 42.80 | 6.15 |
| 1833 | 1-Ethyl-3-methylimidazolium hexylsulfate | 34.77 | 39.54 | 40.95 | -6.18 |
| 1834 | Chloroethane | 20.64 | 26.81 | 26.93 | -6.29 |
| 1835 | Di-t-butyldisulfide | 27.51 | 25.06 | 21.21 | 6.30 |
