# Supplementary material for: Calculation of the Surface Tension of Ordinary Organic and Ionic Liquids by Means of a Generally Applicable Computer Algorithm Based on the Group&mdash;Additivity Method
Source: Preprints.org preprint supplement (doi:10.20944/preprints201804.0210.v1), 2018-04-16
Supplement: Supplementary file 3 [file S3. Compounds List of Surface-Tension Outliers.xls]

## Sheet: Tabelle1
Surface-tension Outliers (dyn/cm)
Compound	exp	calc	Difference
Hydrazine	67.6	24.45	43.15
1,3-Dioxolan-2-one	63.28	30.78	32.5
Glycerol	63.3	38.55	24.75
Glycerol 1,2-diacetate 3-oleate	21.88	45.43	-23.55
Triolein	34.63	55.35	-20.72
Diphenylether	26.36	46.78	-20.42
Diphenylsulfide	24.25	44.21	-19.96
Cellulose acetate	42.9	61.76	-18.86
Glycerol 1,3-dioleate 2-palmitate	26.49	44.91	-18.42
Trimethylamine	13.41	31.16	-17.75
Ethanolamine	48.32	31.04	17.28
4-(2-Chlorobenzyl)-phenyl benzoate	42.88	59.53	-16.65
Ethyleneglycol	47.99	32.33	15.66
Thiodiethanol	54	39.28	14.72
Dimethylether	11.8	26.51	-14.71
2-Thiophenecarboxaldehyde	49.13	35	14.13
3-Amino-1-propanol	44.7	31.24	13.46
1,3-Propyleneglycol	45.62	32.53	13.09
Pentafluoroethane	4.32	17.01	-12.69
2-(Isopropylamino)ethanol	40.7	28.35	12.35
Ethylene-1,2-diamine	41.97	29.75	12.22
Glycerol trinonanoate	24.25	36.39	-12.14
Glutaronitrile	48.11	36.19	11.92
1,4-Butanediol	44.6	32.73	11.87
4-Pyridinecarboxaldehyde	48.66	37.13	11.53
1,1,1-Trifluoroethane	5.22	16.62	-11.4
Nicotinyl alcohol	49.73	38.33	11.4
Perfluorocyclopentane	11.12	22.28	-11.16
2,6-Dibenzyl-3-cresol	39.57	50.68	-11.11
1,1,1,2-Tetrachloroethane	22.73	33.76	-11.03
Glycerol triformate	47.41	36.45	10.96
Diethanolamine	46.93	35.97	10.96
Diethyleneglycol	45.21	34.27	10.94
3-Hydroxypropanenitrile	44.97	34.16	10.81
1,2,6-Hexanetriol	49.9	39.15	10.75
1,5-Pentanediol	43.4	32.93	10.47
Formic acid	37.13	26.67	10.46
Tetrahydrothiophene 1-oxide	49.49	39.34	10.15
2,6-Dibenzyl-4-cresol	40.89	50.68	-9.79
1,2-Dichlorobenzene	26.84	36.57	-9.73
1,4-Dicyanobutane	45.93	36.39	9.54
iso-Butane	10.3	19.76	-9.46
Nicotinaldehyde	46.54	37.13	9.41
Triethyleneglycol	45.57	36.21	9.36
1,4-Oxathiane	42.42	33.12	9.3
1,1-Difluoroethane	10.63	19.88	-9.25
Trifluoroacetic acid	13.53	22.38	-8.85
1,1,1,2-Tetrafluoroethane	8.74	17.52	-8.78
2-Hydroxymethylpyridine	47.28	38.54	8.74
2-Thiophenecarbonitrile	46.44	37.83	8.61
Perfluoro-trans-decahydronaphthalene	18.3	26.77	-8.47
Furfural	43.76	35.34	8.42
Butane	12.46	20.85	-8.39
1-Butene	12.54	20.87	-8.33
trans-2-Butene	13.53	21.81	-8.28
2-Methylpropene	12.27	20.48	-8.21
Heptanedinitrile	44.75	36.59	8.16
Pentaerythritol tetracaproate	30.4	38.54	-8.14
Ethylmethylether	15.93	23.97	-8.04
Isoquinoline	46.2	38.16	8.04
4,6-Dibenzyl-2-cresol	42.71	50.68	-7.97
Hexyl phenyl sulfide	44.07	36.17	7.9
4-Chloroanisole	46.3	38.45	7.85
Morpholine	37.63	29.81	7.82
Methylal	21.12	28.84	-7.72
Methylamine	19.89	27.59	-7.7
Bis(5-H-perfluoropentyl) phthalate	28	35.61	-7.61
1,2-Dimethoxybenzene	32.8	40.33	-7.53
Furan	23.38	30.9	-7.52
Octamethylcyclotetrasiloxane	18.57	25.95	-7.38
6-Benzyl-2-phenylphenol	44.12	51.47	-7.35
4-Benzyl-2-phenylphenol	44.13	51.47	-7.34
Neopentane	12.05	19.34	-7.29
Ethanesulfonylchloride	41.1	33.85	7.25
Dipentyl malate	28.63	35.71	-7.08
Trichloroacetaldehyde	25.27	32.32	-7.05
3-Acetylpyridine	44.66	37.62	7.04
Octanedinitrile	43.81	36.79	7.02
1,1-Dimethoxyethane	21.58	28.41	-6.83
Dipentyl phthalate	31.08	37.87	-6.79
1,3-Dimethoxybenzene	33.9	40.64	-6.74
1,2,3-Propanetriol trioctanoate	29.21	35.79	-6.58
t-Butylchloride	18.3	24.88	-6.58
1-(2-Thienyl)ethanone	42.7	36.14	6.56
Formamide	57.03	not evaluable
Methylacetamide	33.67	not evaluable
N-Methylpyrrolidone	40.7	not evaluable
n-Butylnitrite	31.21	not evaluable
1-Octyl-3-methylimidazolium prolinate	29.28	45.66	-16.38
1-Octylpyridinium nitrate	35.76	51.35	-15.59
1-Octyl-3-methylimidazolium nitrate	33.3	48.56	-15.26
1-Propyl-3-methylimidazolium iodide	56.85	42.18	14.67
1-Butyl-3-(6-hydroxyhexyl)-imidazolium chloride	32.1	46.63	-14.53
1-Octyl-3-methylimidazolium serinate	34.29	48.63	-14.34
1,3-Dimethylimidazolium methosulfate	59.32	45.15	14.17
1-Octyl-3-methylimidazolium alaninate	28.24	42.21	-13.97
1-Octyl-3-cyanopyridinium bis(trifluoromethylsulfonyl)amide	28.65	42.6	-13.95
1-Decyl-3-methylimidazolium methylsulfate	57.6	43.78	13.82
1-Octyl-3-methylimidazolium tetrafluoroborate	32.3	45.66	-13.36
1-Ethyl-1,8-diazabicyclo(5,4,0)undec-7-enium dicyanamide	42.9	29.58	13.32
Triethylpentylammonium bis(trifluoromethylsulfonyl) amide	35.7	22.71	12.99
1-Octyl-3-methylimidazolium methylsulfate	30.41	43.38	-12.97
1-Hexyl-3-cyanopyridinium bis(trifluoromethylsulfonyl)amide	29.37	42.2	-12.83
1,3-Dimethylimidazolium dicyanamide	61.6	48.9	12.7
Imidazolium octanoate	32.8	45.37	-12.57
1-Octyl-3-methylimidazolium ethosulfate	28.67	40.84	-12.17
1-(2-Aminoethyl)-3-methylimidazolium hexafluorophosphate	55.42	43.73	11.69
1-Ethyl-3-methylimidazolium L-alanine	52.7	41.01	11.69
1-Hexyl-4-cyanopyridinium bis(trifluoromethylsulfonyl)amide	30.6	42.2	-11.6
1-Octyl-3-methylimidazolium bromide	31.6	43.18	-11.58
Tri(butyl) ethylphosphonium diethylphosphate	33.6	22.18	11.42
Triethylhexylammonium bis(trifluoromethylsulfonyl) amide	34.1	22.91	11.19
1-Octyl-3-methylpyridinium tetrafluoroborate	36.51	47.46	-10.95
1-Methyl-3-octylimidazolium iodide	32.7	43.18	-10.48
1-Ethyl-3-methylimidazolium dicyanoamide	56.4	45.93	10.47
1-Hexyl-3-methylimidazolium L-proline	34.8	45.26	-10.46
1-Butyl-1,8-diazabicyclo(5,4,0)undec-7-enium dicyanamide	40.09	29.98	10.11
1-Butyl-3-cyanopyridinium bis(trifluoromethylsulfonyl)amide	32	41.8	-9.8
Triethyloctylammonium bis(trifluoromethylsulfonyl) amide	33.1	23.31	9.79
1-Butyl-1-methylpyrrolidinium dicyanamide	56.2	46.49	9.71
Trihexyl tetradecyl phosphonium bis(trifluoromethylsulfonyl)amide	30.13	20.5	9.63
1-Ethyl-3-methylimidazolium octylsulfate	31.29	40.84	-9.55
1-Hexyl-3-methylimidazolium methosulfate	33.59	42.98	-9.39
1-Methyl-3-octylimidazolium chloride	33.8	43.18	-9.38
1-Pentyl-3-methylimidazolium L-proline	35.7	45.06	-9.36
1-Propyl-3-methylimidazolium hexafluorophosphate	47.99	38.8	9.19
1-Heptyl-3-methylimidazolium hydrogensulfate	37.5	46.63	-9.13
1-Ethyl-4-methylpyridinium bis(trifluoromethylsulfonyl)amide	24.3	33.35	-9.05
1-Decyl-3-methylimidazolium tetracyanoborate	34.74	43.67	-8.93
Triethyldecylammonium bis(trifluoromethylsulfonyl) amide	32.4	23.71	8.69
1-Hexyl-3-methylimidazolium ethosulfate	31.77	40.44	-8.67
1-Butyl-3-methylimidazolium dibutylphosphate	29.4	38.03	-8.63
1-Ethyl-3-methylimidazolium methanesulfonate	50.9	42.67	8.23
1-Octyl-3-methylimidazolium trifluoromethylsulfonate	28.5	36.64	-8.14
1-Octyl-3-methylimidazolium glycinate	35.37	43.41	-8.04
1-Octyl-3-methylimidazolium tricyanomethanide	39.03	46.96	-7.93
1-Butyl-3-methylimidazolium L-proline	37	44.86	-7.86
Triethyldodecylammonium bis(trifluoromethylsulfonyl) amide	31.8	24.11	7.69
1-Ethyl-3-methylimidazolium ethyltrifluoroborate	42.5	34.93	7.57
1-Ethyl-3-methylimidazolium threoninate	54.8	47.23	7.57
1-Nonyl-3-methylimidazolium hexafluorophosphate	32.7	40	-7.3
1-Propyl-3-methylimidazolium L-alanine	48.5	41.21	7.29
1,3-Diethylimidazolium bis(trifluoromethylsulfonyl) amide	35.6	28.58	7.02
N-Methyl-N-(2,3-dihydroxypropyl)pyrrolidinium bis(trifluoromethanesulfonyl) amide	38	44.97	-6.97
1-(3-Aminopropyl)-3-methylimidazolium hexafluorophosphate	50.84	43.93	6.91
1-Ethyl-3-methylimidazolium tetracyanoborate	48.72	42.07	6.65
1-Propyl-3-methylimidazolium L-proline	38.4	44.98	-6.58
1-Octyl-3-methylimidazolium asparaginate	34.32	not evaluable
1-(N-Butylacetamido)-3-ethylimidazolium bis(trifluoromethanesulfonyl) amide	31.8	not evaluable
