# Supplementary material for: Calculation of the Surface Tension of Ordinary Organic and Ionic Liquids by Means of a Generally Applicable Computer Algorithm Based on the Group&mdash;Additivity Method
Source: Preprints.org preprint supplement (doi:10.20944/preprints201804.0210.v1), 2018-04-16
Supplement: Supplementary file 5 [file Table 1.doc]

| **No** | **Atom Type** | **Neighbours** | **Meaning** | **Example** |
| --- | --- | --- | --- | --- |
| 1 | B(-) | C4 |  | B- in tetracyanoborate |
| 2 | B(-) | CF3 | C**B**F3- | alkyltrifluoroborate |
| 3 | B(-) | F4 | **B**F4- | tetrafluoroborate |
| 4 | C sp3 | H3B(-) | H3**C**B- | C in methyltrifluoroborate |
| 5 | C(-) sp3 | C3 |  | central C- in tricyanocarbeniate |
| 6 | C aromatic | H:C:N(+) | C:**C**H:N+ | C2 in pyridinium |
| 7 | C(+) aromatic | C:N2 | N:**C**+(C):N | C2 in 2-alkylimidazolium |
| 8 | C sp | C#N(-) | C-(**C**#N) | cyano-C in tricyanocarbeniate |
| 9 | C sp | N#N(-) | N-(**C**#N) | C in dicyanoamide |
| 10 | C sp | B#N(-) | B-(**C**#N) | C in tetracyanoborate |
| 11 | C sp | =N=S(-) | N=**C**=S- | thiocyanate |
| 12 | N(+) sp3 | C4 | **N**+C4 | tetraalkylammonium |
| 13 | N(+) sp2 | O2=O(-) | **N**O3- | nitrate |
| 14 | N aromatic | C2:C(+) | C-**N**(C):C+ | N1 in 1-alkylimidazolium |
| 15 | N(+) aromatic | C:C2 | C:**N**+(C):C | N in 1-alkylpyridinium |
| 16 | N(-) | C2 | C-**N**--C | N- in dicyanoamide |
| 17 | N(-) | S2 | S-**N**--S | bis(trifluoromethanesulfonyl)amide |
| 18 | P4 | CO2=O(-) | C**P**O3- | alkylphosphonate |
| 19 | P4 | O3=O(-) | O=**P**O3- | dialkylphosphate |
| 20 | P(+) | C4 | **P**C4+ | tetraalkylphosphonium |
| 21 | P(-) | C3F3 | F3**P**-C3 | tris(pentafluoroethyl)trifluorophosphate |
| 22 | P(-) | F6 | **P**F6- | hexafluorophosphate |
| 23 | S4 | CO=O2(-) | C-**S**O3- | alkylsulfonate |
| 24 | S4 | O2=O2(-) | **S**O4- | alkylsulfate |
