# Supplementary material for: Calculation of the Surface Tension of Ordinary Organic and Ionic Liquids by Means of a Generally Applicable Computer Algorithm Based on the Group&mdash;Additivity Method
Source: Preprints.org preprint supplement (doi:10.20944/preprints201804.0210.v1), 2018-04-16
Supplement: Supplementary file 7 [file Table 2.doc]

| **Entry** | **Atom Type** | **Neighbours** | **Contribution** | **Occurrences** | **Molecules** |
| --- | --- | --- | --- | --- | --- |
| 1 | Const |  | 24.2 | 1895 | 1895 |
| 2 | B | C3 | -4.36 | 1 | 1 |
| 3 | B | O3 | 0.74 | 6 | 6 |
| 4 | B(-) | C4 | 17.66 | 5 | 5 |
| 5 | B(-) | CF3 | 1.41 | 5 | 5 |
| 6 | B(-) | F4 | 1.86 | 10 | 10 |
| 7 | C sp3 | H3B(-) | 1.11 | 1 | 1 |
| 8 | C sp3 | H3C | -2.27 | 3054 | 1530 |
| 9 | C sp3 | H3C(+) | 29.59 | 3 | 3 |
| 10 | C sp3 | H3N | 7.19 | 111 | 104 |
| 11 | C sp3 | H3N(+) | 8.28 | 34 | 23 |
| 12 | C sp3 | H3O | 3.27 | 192 | 154 |
| 13 | C sp3 | H3S | 4.63 | 13 | 11 |
| 14 | C sp3 | H3S(+) | 4.71 | 1 | 1 |
| 15 | C sp3 | H3P | 5.48 | 2 | 2 |
| 16 | C sp3 | H3Si | -0.63 | 113 | 18 |
| 17 | C sp3 | H2BC | 2.27 | 3 | 1 |
| 18 | C sp3 | H2BC(-) | -6.87 | 3 | 3 |
| 19 | C sp3 | H2C2 | 0.2 | 6359 | 1366 |
| 20 | C sp3 | H2C2(+) | 2 | 7 | 7 |
| 21 | C sp3 | H2CN | 6.43 | 271 | 175 |
| 22 | C sp3 | H2CN(+) | 6.17 | 74 | 46 |
| 23 | C sp3 | H2CO | 3 | 1277 | 673 |
| 24 | C sp3 | H2CP | 7.06 | 16 | 15 |
| 25 | C sp3 | H2CP(+) | 2.93 | 24 | 6 |
| 26 | C sp3 | H2CS | 4.65 | 76 | 55 |
| 27 | C sp3 | H2CS(+) | 6.68 | 5 | 2 |
| 28 | C sp3 | H2CSi | 3.93 | 12 | 5 |
| 29 | C sp3 | H2CF | -1.5 | 5 | 5 |
| 30 | C sp3 | H2CCl | 4.88 | 52 | 40 |
| 31 | C sp3 | H2CBr | 6.51 | 41 | 33 |
| 32 | C sp3 | H2CJ | 9.13 | 28 | 21 |
| 33 | C sp3 | H2O2 | 6.47 | 7 | 7 |
| 34 | C sp3 | HC3 | 1.54 | 428 | 304 |
| 35 | C sp3 | HC2N | 7.61 | 15 | 12 |
| 36 | C sp3 | HC2N(+) | 8.41 | 6 | 6 |
| 37 | C sp3 | HC2O | 5.14 | 150 | 116 |
| 38 | C sp3 | HC2S | 5.71 | 8 | 5 |
| 39 | C sp3 | HC2Cl | 4.85 | 12 | 12 |
| 40 | C sp3 | HC2Br | 6.45 | 10 | 10 |
| 41 | C sp3 | HC2J | 9.6 | 4 | 4 |
| 42 | C sp3 | HCO2 | 7.66 | 14 | 12 |
| 43 | C sp3 | HCF2 | -1.69 | 29 | 17 |
| 44 | C sp3 | HCCl2 | 5.42 | 12 | 11 |
| 45 | C sp3 | HCBr2 | 12.13 | 3 | 2 |
| 46 | C sp3 | HO3 | 10.22 | 3 | 3 |
| 47 | C sp3 | C4 | 3.06 | 111 | 104 |
| 48 | C sp3 | C3N | 4.58 | 2 | 2 |
| 49 | C sp3 | C3O | 6.14 | 36 | 36 |
| 50 | C sp3 | C3S | 6.65 | 5 | 4 |
| 51 | C sp3 | C3F | 2.28 | 21 | 11 |
| 52 | C sp3 | C3Cl | 7.43 | 42 | 33 |
| 53 | C sp3 | C3Br | 3.85 | 1 | 1 |
| 54 | C sp3 | C2F2 | -0.39 | 333 | 57 |
| 55 | C sp3 | C2Cl2 | 0.22 | 2 | 2 |
| 56 | C sp3 | CNF2 | 8.16 | 9 | 3 |
| 57 | C sp3 | COF2 | 3.12 | 34 | 18 |
| 58 | C sp3 | CF3 | -4.98 | 111 | 49 |
| 59 | C sp3 | CSF2 | 0.12 | 2 | 1 |
| 60 | C sp3 | CF2Cl | -0.81 | 2 | 1 |
| 61 | C sp3 | CPF2(-) | 2.73 | 33 | 11 |
| 62 | C sp3 | CFCl2 | -0.68 | 1 | 1 |
| 63 | C sp3 | CCl3 | 4.67 | 10 | 9 |
| 64 | C sp3 | N3F(+) | -4.49 | 1 | 1 |
| 65 | C sp3 | SF3 | -2.26 | 110 | 57 |
| 66 | C(-) sp3 | C3 | 9.36 | 3 | 3 |
| 67 | C sp2 | H2=C | -2.37 | 78 | 77 |
| 68 | C sp2 | HB=C(-) | 2.59 | 1 | 1 |
| 69 | C sp2 | HC=C | 1.02 | 266 | 174 |
| 70 | C sp2 | HC=O | 2.85 | 13 | 13 |
| 71 | C sp2 | H=CN | 2.66 | 216 | 108 |
| 72 | C sp2 | H=CO | 0.2 | 9 | 9 |
| 73 | C sp2 | H=CS | 4.14 | 32 | 30 |
| 74 | C sp2 | H=CCl | 0.86 | 5 | 3 |
| 75 | C sp2 | H=CBr | -1.78 | 1 | 1 |
| 76 | C sp2 | HN=O | 10.42 | 2 | 2 |
| 77 | C sp2 | HO=O | 1.37 | 13 | 13 |
| 78 | C sp2 | C2=C | 3.13 | 67 | 56 |
| 79 | C sp2 | C2=N | 5.62 | 35 | 29 |
| 80 | C sp2 | C2=O | 6.32 | 73 | 72 |
| 81 | C sp2 | C=CO | 1.43 | 3 | 3 |
| 82 | C sp2 | C=CS | 5.28 | 25 | 24 |
| 83 | C sp2 | C=CCl | 3.27 | 9 | 5 |
| 84 | C sp2 | C=CBr | 7.43 | 3 | 3 |
| 85 | C sp2 | CN=O | 7.28 | 2 | 2 |
| 86 | C sp2 | CO=O | 2.26 | 737 | 528 |
| 87 | C sp2 | CO=O(-) | -2.94 | 23 | 23 |
| 88 | C sp2 | =COS | 7.32 | 2 | 2 |
| 89 | C sp2 | C=OCl | 7.64 | 1 | 1 |
| 90 | C sp2 | C=OBr | 11.53 | 1 | 1 |
| 91 | C sp2 | =CSCl | 7.52 | 3 | 2 |
| 92 | C sp2 | =CSBr | 10.45 | 3 | 2 |
| 93 | C sp2 | =CSJ | 15.79 | 1 | 1 |
| 94 | C sp2 | =CCl2 | 2.83 | 6 | 4 |
| 95 | C sp2 | NO=O | 6.04 | 7 | 4 |
| 96 | C sp2 | O2=O | 2.66 | 12 | 12 |
| 97 | C sp2 | OS=S | 9.16 | 5 | 5 |
| 98 | C aromatic | H:C2 | 1.02 | 1619 | 345 |
| 99 | C aromatic | H:C:N | 4.06 | 106 | 63 |
| 100 | C aromatic | H:C:N(+) | 8.25 | 33 | 18 |
| 101 | C aromatic | H:N2 | 2.22 | 1 | 1 |
| 102 | C aromatic | :C3 | 1.64 | 119 | 60 |
| 103 | C aromatic | C:C2 | 2.22 | 313 | 254 |
| 104 | C aromatic | C:C:N | 5.5 | 21 | 20 |
| 105 | C aromatic | C:C:N(+) | 13.36 | 3 | 3 |
| 106 | C aromatic | :C2N | 6.25 | 19 | 19 |
| 107 | C aromatic | :C2N(+) | 9.97 | 10 | 10 |
| 108 | C aromatic | :C2:N | 9.46 | 1 | 1 |
| 109 | C aromatic | :C2O | 3.81 | 33 | 30 |
| 110 | C aromatic | :C2S | 6.75 | 9 | 9 |
| 111 | C aromatic | :C2Si | 3.94 | 4 | 3 |
| 112 | C aromatic | :C2F | -0.34 | 9 | 8 |
| 113 | C aromatic | :C2Cl | 3.97 | 21 | 17 |
| 114 | C aromatic | :C2Br | 7.16 | 4 | 4 |
| 115 | C aromatic | :C2J | 9.75 | 3 | 3 |
| 116 | C(+) aromatic | H:N2 | 0.95 | 104 | 104 |
| 117 | C(+) aromatic | C:N2 | -22.89 | 10 | 10 |
| 118 | C sp | H#C | 1.54 | 24 | 24 |
| 119 | C sp | B#N(-) | -4.56 | 20 | 5 |
| 120 | C sp | C#C | 1.75 | 56 | 40 |
| 121 | C sp | C#N | 5.97 | 63 | 62 |
| 122 | C sp | C#N(-) | -2.09 | 9 | 3 |
| 123 | C sp | N#N(-) | 0.78 | 16 | 8 |
| 124 | C sp | #NS | 9.73 | 4 | 4 |
| 125 | C sp | =N=S | 4.92 | 4 | 4 |
| 126 | C sp | =N=S(-) | 4.88 | 7 | 7 |
| 127 | N sp3 | H2C | -3.45 | 28 | 28 |
| 128 | N sp3 | H2C(pi) | 4.45 | 6 | 6 |
| 129 | N sp3 | H2N | 0.58 | 5 | 5 |
| 130 | N sp3 | HC2 | -9.45 | 20 | 20 |
| 131 | N sp3 | HC2(pi) | -4.69 | 7 | 7 |
| 132 | N sp3 | HC2(2pi) | 6.06 | 1 | 1 |
| 133 | N sp3 | HCN(pi) | 9.44 | 2 | 2 |
| 134 | N sp3 | HSi2 | -2.27 | 1 | 1 |
| 135 | N sp3 | C3 | -14.39 | 18 | 18 |
| 136 | N sp3 | C3(pi) | -11.86 | 7 | 7 |
| 137 | N sp3 | C2N | -7.89 | 4 | 4 |
| 138 | N sp3 | C2N(pi) | 0.57 | 6 | 6 |
| 139 | N sp3 | C2N(2pi) | 4.39 | 2 | 2 |
| 140 | N(+) sp3 | HC3 | -5.94 | 1 | 1 |
| 141 | N(+) sp3 | C4 | -5.99 | 21 | 21 |
| 142 | N aromatic | HC:C(+) | 9.29 | 3 | 3 |
| 143 | N aromatic | :C2 | -2.37 | 64 | 63 |
| 144 | N aromatic | C2:C(+) | 0.43 | 225 | 114 |
| 145 | N aromatic | :C:N | 7.05 | 2 | 1 |
| 146 | N(+) aromatic | C:C2 | -2.46 | 18 | 18 |
| 147 | N sp2 | C=C | 0 | 4 | 4 |
| 148 | N sp2 | =CN | -0.22 | 12 | 6 |
| 149 | N sp2 | C=N | -1.91 | 6 | 3 |
| 150 | N sp2 | =CO | 0.11 | 23 | 23 |
| 151 | N sp2 | N=O | -2.46 | 9 | 9 |
| 152 | N sp2 | O=O | 3.15 | 3 | 3 |
| 153 | N(+) sp2 | CO=O(-) | 1.81 | 22 | 20 |
| 154 | N(+) sp2 | O2=O(-) | 5.92 | 23 | 13 |
| 155 | N(-) | C2 | -0.34 | 8 | 8 |
| 156 | N(-) | S2 | -6.57 | 54 | 54 |
| 157 | O | HC | 1.1 | 161 | 150 |
| 158 | O | HC(pi) | 1.17 | 91 | 91 |
| 159 | O | HN(pi) | 3.23 | 6 | 6 |
| 160 | O | HO | 25.84 | 2 | 1 |
| 161 | O | HP | 0.37 | 13 | 7 |
| 162 | O | HS | 9.13 | 3 | 3 |
| 163 | O | BC | -1.43 | 18 | 6 |
| 164 | O | C2 | -4.17 | 286 | 180 |
| 165 | O | C2(pi) | -1.02 | 725 | 561 |
| 166 | O | C2(2pi) | 4.86 | 5 | 5 |
| 167 | O | CN(pi) | -2.73 | 16 | 16 |
| 168 | O | CN(+)(pi) | -1 | 22 | 12 |
| 169 | O | CN(2pi) | 6.07 | 4 | 4 |
| 170 | O | CP | -0.44 | 168 | 75 |
| 171 | O | CP(pi) | -3.32 | 3 | 1 |
| 172 | O | CS | 1.66 | 35 | 23 |
| 173 | O | CSi | -3.18 | 23 | 5 |
| 174 | O | Si2 | 1.67 | 30 | 9 |
| 175 | P3 | O3 | -1.65 | 20 | 20 |
| 176 | P4 | HO2=O | 3.01 | 16 | 16 |
| 177 | P4 | C2O=O(-) | -9.14 | 1 | 1 |
| 178 | P4 | CO2=O | -2.07 | 15 | 15 |
| 179 | P4 | CO2=O(-) | 0.48 | 1 | 1 |
| 180 | P4 | O3=O | 3.14 | 13 | 13 |
| 181 | P4 | O3=O(-) | -6.4 | 6 | 6 |
| 182 | P4 | O2=OF | 0.56 | 2 | 2 |
| 183 | P4 | O2=OCl | 5.51 | 2 | 2 |
| 184 | P4 | O=OCl2 | 8.09 | 2 | 2 |
| 185 | P(-) | C3F3 | -3.9 | 11 | 11 |
| 186 | P(-) | F6 | -4.69 | 6 | 6 |
| 187 | P(+) | C4 | 0.27 | 6 | 6 |
| 188 | S2 | HC | -1.43 | 11 | 11 |
| 189 | S2 | HC(pi) | 2.96 | 1 | 1 |
| 190 | S2 | C2 | -2.58 | 20 | 20 |
| 191 | S2 | C2(pi) | -3 | 15 | 15 |
| 192 | S2 | C2(2pi) | -3.54 | 33 | 33 |
| 193 | S2 | CS | 0.59 | 22 | 13 |
| 194 | S4 | C2=O | 5.99 | 3 | 3 |
| 195 | S4 | CN=O2(-) | 0.07 | 108 | 54 |
| 196 | S4 | CO=O2 | 9.34 | 3 | 3 |
| 197 | S4 | CO=O2(-) | -4.84 | 5 | 5 |
| 198 | S4 | C=O2F | 1.59 | 1 | 1 |
| 199 | S4 | C=O2Cl | 7.31 | 5 | 5 |
| 200 | S4 | O2=O | -0.67 | 8 | 8 |
| 201 | S4 | O2=O2 | 3.37 | 4 | 4 |
| 202 | S4 | O2=O2(-) | -6.33 | 7 | 7 |
| 203 | S4 | O=O2S | -0.57 | 4 | 4 |
| 204 | S(+) | C3 | 8.73 | 2 | 2 |
| 205 | Si | HC3 | -8.45 | 1 | 1 |
| 206 | Si | HC2Cl | -5.21 | 1 | 1 |
| 207 | Si | HCCl2 | -4.15 | 1 | 1 |
| 208 | Si | HO3 | 4.42 | 1 | 1 |
| 209 | Si | C4 | -7.85 | 4 | 4 |
| 210 | Si | C3N | 0 | 2 | 1 |
| 211 | Si | C3O | -3.01 | 14 | 7 |
| 212 | Si | C3Cl | -4.56 | 1 | 1 |
| 213 | Si | C3Br | -2.73 | 3 | 3 |
| 214 | Si | C2O2 | -0.09 | 21 | 6 |
| 215 | Si | C2Cl2 | -2.84 | 1 | 1 |
| 216 | Si | C2Br2 | 2.08 | 1 | 1 |
| 217 | Si | CCl3 | -3.27 | 1 | 1 |
| 218 | Si | O4 | 8.03 | 6 | 4 |
| 219 | Alkane | No of C atoms | 0.24 | 1263 | 125 |
| 220 | Unsaturated HC | No of C atoms | 0.03 | 1314 | 125 |
| A | Based on | Valid groups | 164 |  | 1895 |
| B | Goodness of fit | R2 | 0.9023 |  | 1835 |
| C | Deviation | Average | 1.55 |  | 1835 |
| D | Deviation | Standard | 2.01 |  | 1835 |
| E | K-fold cv | K | 10 |  | 1769 |
| F | Goodness of fit | Q2 | 0.8821 |  | 1769 |
| G | Deviation | Average (cv) | 1.67 |  | 1769 |
| H | Deviation | Standard (cv) | 2.16 |  | 1769 |
