# Supplementary material for: Calculation of the Surface Tension of Ordinary Organic and Ionic Liquids by Means of a Generally Applicable Computer Algorithm Based on the Group&mdash;Additivity Method
Source: Preprints.org preprint supplement (doi:10.20944/preprints201804.0210.v1), 2018-04-16
Supplement: Supplementary file 9 [file Table 3.doc]

| 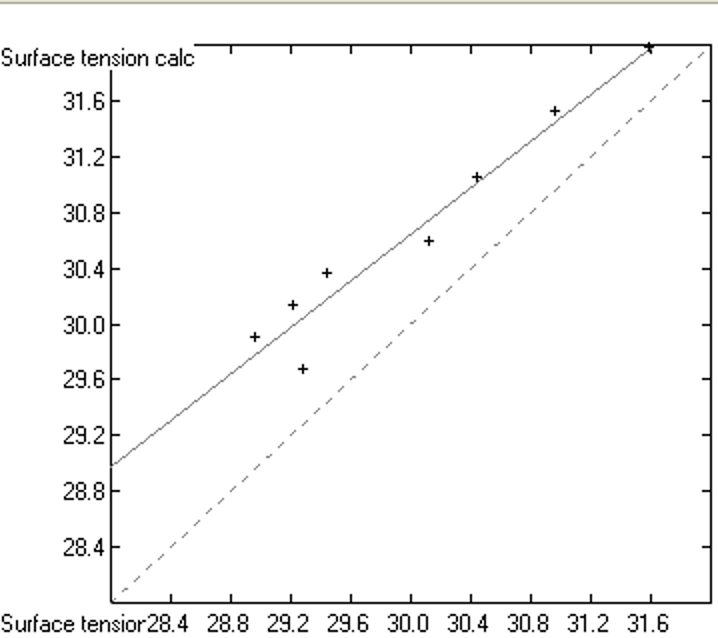  **Fig. 4a**:Alkylbenzenes  (CH3(CH2)nPh, n=3–11) | 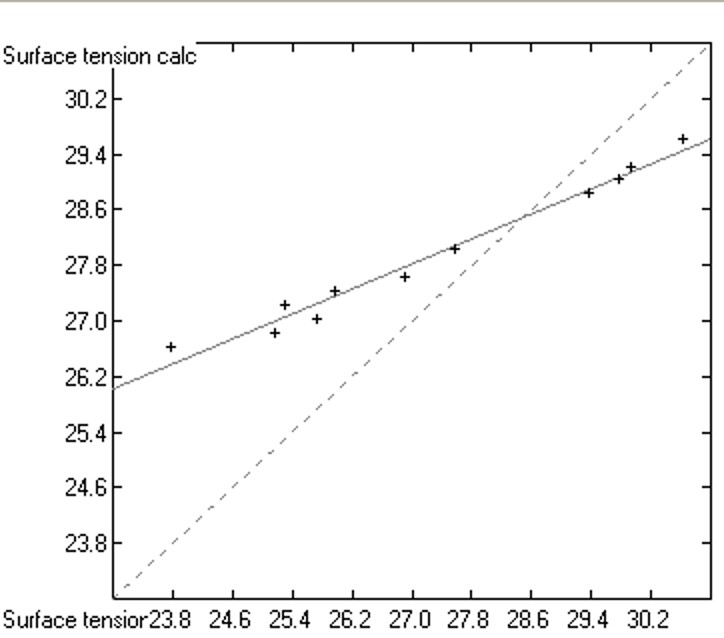  **Fig. 4b**:Methylesters  (CH3(CH2)nCOOCH3, n=1–16) |
| --- | --- |
| 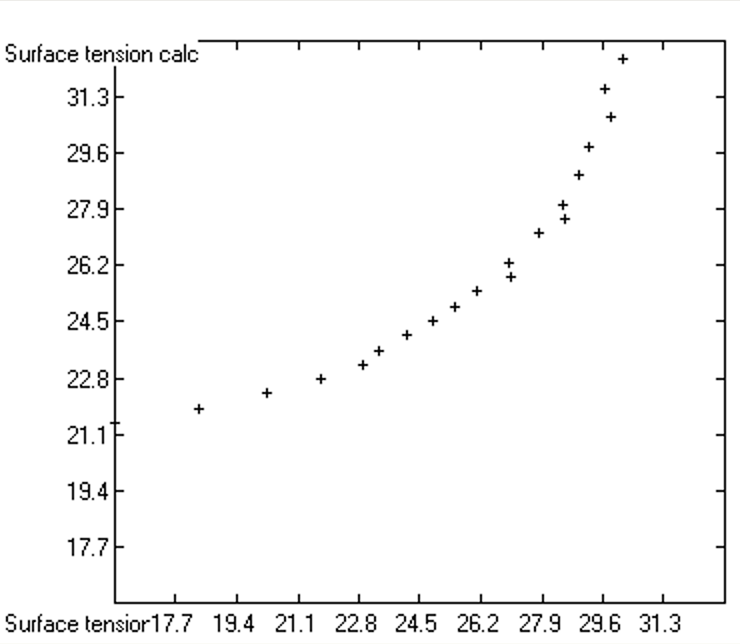  **Fig. 4c**: n-Alkanes  (CH3(CH2)nCH3, n=3-28) | 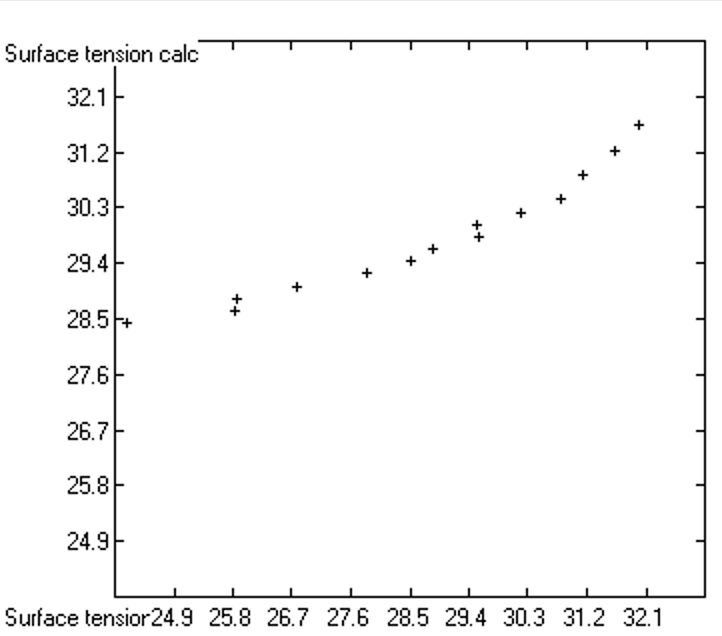  **Fig. 4d**: 1-Bromo-n-alkanes  (Br(CH2)nCH3, n=1-17) |
| 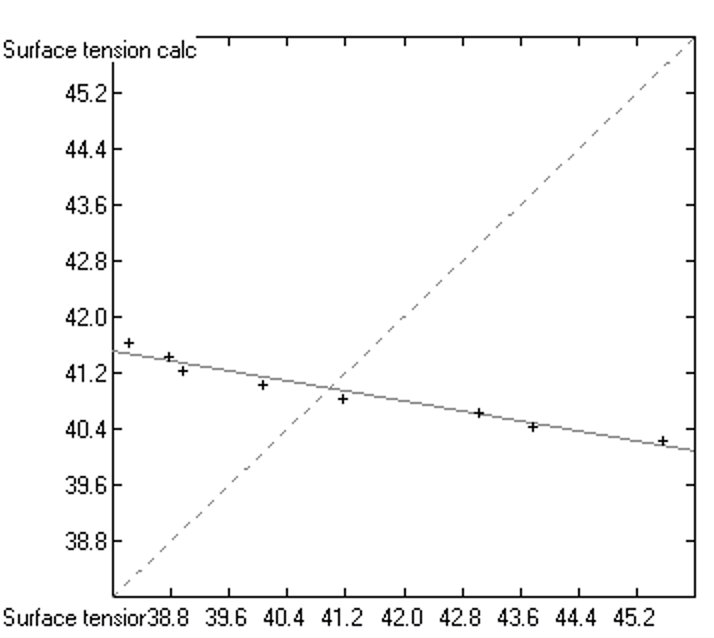  **Fig. 4e**: n-Alkyl -dinitrate  (O2NO(CH2)nONO2, n=3-10) | 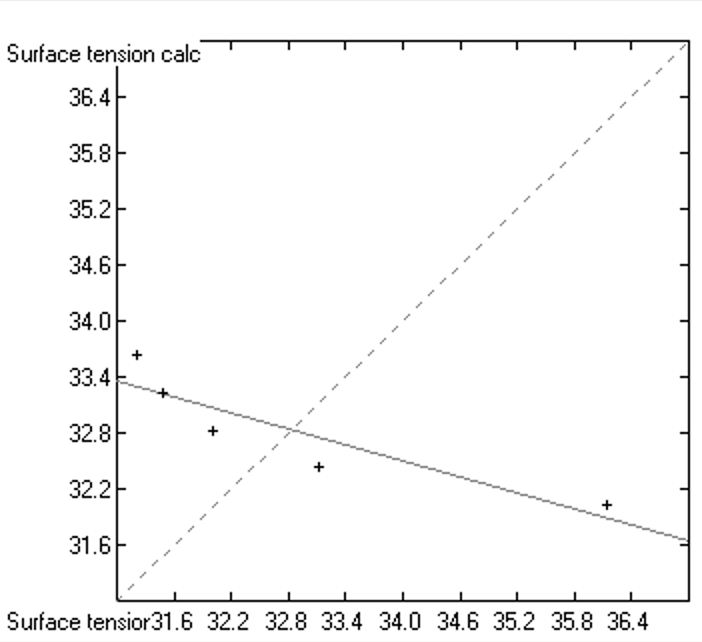  **Fig. 4f**: 1,4-Bis(CH3(CH2)nCOO)-2-butyne, n=1-5 |
| 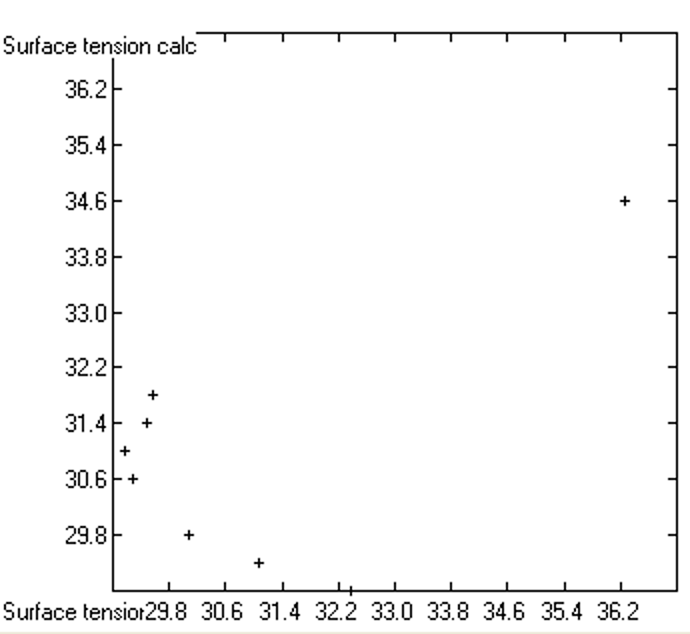  **Fig. 4g**: 1,3-Bis(CH3(CH2)n)imidazolium bis(trifluoromethylsulfonyl)amide, n=0-9 | 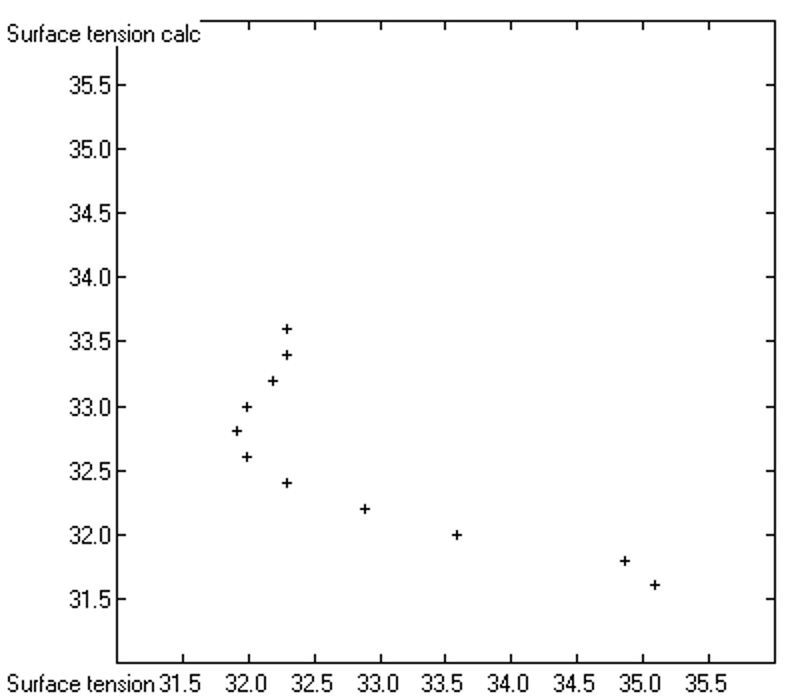  **Fig. 4h**:1-(CH3(CH2)n)-3-methylimidazolium bis(trifluoromethanesulfonyl) amide, n=1-11 |
